# Supplementary material for: Stereoselective peptide catalysis in complex environments – from river water to cell lysates
Source: Royal Society of Chemistry journal article supplement (doi:10.1039/d2sc02044k), 2022-01-01
Supplement: d2sc02044k1.pdf [file d2sc02044k1.pdf]

# **Stereoselective Peptide Catalysis in Complex Environments – From River Water to Cell Lysates**

Tobias Schnitzer, Jonas W. Rackl, and Helma Wennemers\*

ETH Zürich, Laboratory of Organic Chemistry  
Department of Chemistry and Applied Biosciences  
Vladimir-Prelog-Weg 3, CH-8093 Zürich (Switzerland)  
E-mail: Helma.Wennemers@org.chem.ethz.ch

## **Supporting Information**

### **Contents**

|                                                                                         |            |
|-----------------------------------------------------------------------------------------|------------|
| <b>1. General Aspects and Materials.....</b>                                            | <b>2</b>   |
| <b>2. Synthesis and Analytical Data of the Peptides .....</b>                           | <b>3</b>   |
| <b>3. ROESY spectrum of 2a .....</b>                                                    | <b>9</b>   |
| <b>4. Crystal Structure of H-DPro-MePro-Glu-NH<sub>2</sub> (2a) .....</b>               | <b>10</b>  |
| <b>5. Conjugate Addition Reaction with Peptides 1a and 2a in Organic Solvents .....</b> | <b>11</b>  |
| <b>6. Conjugate Addition Reaction in the Presence of Additives .....</b>                | <b>14</b>  |
| <b>7. Conjugate Addition Reaction in Complex Mixtures .....</b>                         | <b>43</b>  |
| <b>8. Conjugate Addition Reaction in Cell Lysate: .....</b>                             | <b>106</b> |
| <b>9. References.....</b>                                                               | <b>112</b> |

## 1. General Aspects and Materials

Reagents and materials were of the highest commercially available grade and used without further purification. Reactions were monitored by thin layer chromatography using Merck silica gel 60 F254 aluminium sheets. Visualization of the compounds was achieved by UV-Vis or  $\text{KMnO}_4$ . Flash chromatography and plug filtrations were performed using silica gel 60 (particle size 0.040 – 0.063 mm, 200 – 400 mesh) manufactured by Fluka.  $^1\text{H}$  and  $^{13}\text{C}$  NMR spectra were recorded on a Bruker DRX 400, a Bruker AV III 400 (400 MHz/100 MHz) or a Bruker AV III 600 (600 MHz/150 MHz). All spectra were recorded at 25 °C, unless stated otherwise. Chemical shifts ( $\delta$ ) are reported in parts per million (ppm) relative to the signal of tetramethylsilane (TMS) using the residual solvent signals. SFC analyses were performed on an analytical SFC with a diode array detector ACQUITY-UPLC-PDA from Waters using chiral stationary phase columns (Trefoil, AS, AD, IA, Whelk, IC, OD, OJ) (150 mm x 30 mm) from Daicel or Waters under the reported conditions. HPLC analyses were performed on an analytical Ultimate 3000 HPLC system from Dionex with a diode array detector and chiral stationary phase columns (Daicel AD-H, Daicel AS-H, AY-H, OD-H or Daicel OJ-H). High-resolution electron ionization (HR-EI) mass spectra were measured on a Waters Micromass AutoSpec Ultima spectrometer. High-resolution MALDI spectra were acquired on a Bruker solariX 94 (ESI/MALDI-FT-ICR) and a Bruker Ultra-Flex II (MALDI-TOF) spectrometer.

## 2. Synthesis and Analytical Data of the Peptides

### Peptide Synthesis

Peptides **1** and **2** were prepared by solution peptide synthesis, peptide **1a** and **2b** by solid phase peptide synthesis. The syntheses of **1**<sup>1</sup> and **1a**<sup>2</sup> have been previously described.

**Procedure for the synthesis of H-Glu(O<sup>t</sup>Bu)-NHC<sub>12</sub>H<sub>25</sub>:** Z-Glu(O<sup>t</sup>Bu)-OH (5.0 g, 14.8 mmol,

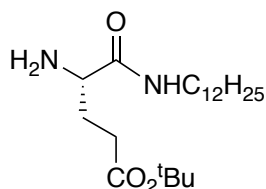

1 equiv.), dodecylamine (2.75 g, 14.82 mmol, 1.0 equiv.) and EDC•HCl (3.4 g, 17.8 mmol, 1.2 equiv.) were suspended in EtOAc (75 mL) and stirred at room temperature overnight. The mixture was diluted with EtOAc (350 mL) and washed with 0.1 M HCl (3x 100 mL), aq. 5% w/w Na<sub>2</sub>CO<sub>3</sub> (2x 100 mL) and brine (150 mL). The organic layer was dried over MgSO<sub>4</sub> and the solvent was removed under reduced pressure. The

resulting colorless solid was purified by flash column chromatography on silica gel eluting with 1-5% MeOH in CH<sub>2</sub>Cl<sub>2</sub>. The colorless solid was then dissolved in MeOH (20 mL). Pd/C (10 % w/w) was added and the mixture was stirred under a hydrogen atmosphere (balloon) at room temperature overnight. The reaction mixture was filtered over a pad of celite, which was washed with MeOH (3x 10 mL). Removal of all volatiles yielded the desired product as colorless solid (3.95 g, 72%). <sup>1</sup>H NMR (400 MHz, CDCl<sub>3</sub>) δ = 7.17 (s, *J* = 3.1 Hz, 1H), 3.37 (dd, *J* = 7.5, 5.0 Hz, 1H), 3.23 (td, *J* = 7.2, 5.9 Hz, 2H), 2.36 (m, 1H), 2.08 (dtd, *J* = 14.1, 7.5, 5.0 Hz, 1H), (dtd, *J* = 14.3, 7.7, 6.8 Hz, 1H), 1.55 – 1.45 (m, 2H), 1.43 (s, 9H), 1.36 – 1.17 (m, 20H), 0.86 (t, *J* = 6.8 Hz, 3H). <sup>13</sup>C NMR (126 MHz, CDCl<sub>3</sub>) δ = 174.3, 173.0, 80.7, 54.8, 39.3, 32.2, 32.05, 30.55, 29.9, 29.8, 29.73, 29.69, 29.5, 29.4, 28.2, 27.1, 22.8, 14.2. The spectroscopic data are in agreement with published data.<sup>1</sup>

**Procedure for the synthesis of Boc-DPro-MePro-OH:** Boc-DPro-OH (9.5 g, 44.1 mmol, 1.0 equiv.) and EDC•HCl (10.2 g, 53.0 mmol, 1.2 equiv.) were dissolved in EtOAc (110 mL). <sup>i</sup>Pr<sub>2</sub>NEt (15.0 mL 88.3 mmol, 2.2 equiv.) was added

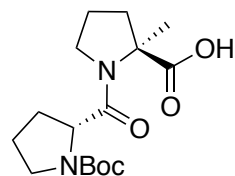

and the mixture was stirred for 5 min before addition of H-MePro-OMe•HCl (6.3 g, 44.1 mmol, 1.0 equiv.). The reaction mixture was stirred at room temperature overnight. The reaction mixture was diluted with EtOAc and subsequently washed with 1 M aq. HCl (100 mL), H<sub>2</sub>O (100

mL), sat. aq. NaHCO<sub>3</sub> solution (100 mL) and brine (100 mL). The combined aqueous layers were then reextracted with EtOAc (10x). The combined organic layers were dried over MgSO<sub>4</sub> and the solvent removed under reduced pressure. The crude product (colorless solid, 5.7 g) was purified by flash column chromatography on silica gel eluting with 1-5% MeOH in CH<sub>2</sub>Cl<sub>2</sub>. The resulting colorless solid was dissolved in THF/MeOH 1:1 (20 mL) and NaOH (1.33 g, 2 equiv.) and water (1 mL) was added. The reaction mixture was stirred for 1.5-2 h, acidified with concentrated HCl (pH ≈ 2) and extracted with CH<sub>2</sub>Cl<sub>2</sub> (3x). The combined organic layers were dried over MgSO<sub>4</sub>. Removal of all volatiles yielded the desired product as colorless solid (5.20 g, 37%). <sup>1</sup>H NMR (400 MHz, CDCl<sub>3</sub>) δ = 4.44 (m, 1H), 4.05 – 3.77 (m, 1H), 3.67 – 3.39 (m, 3H), 2.85 – 2.58 (m, 1H), 2.32 – 1.78 (m, 3H), 1.67 and 1.65 (2 s, 3H), 1.44 and 1.40 (2 s, 9H). <sup>13</sup>C NMR (126 MHz, CDCl<sub>3</sub>) δ = 176.6, 174.3, 173.8, 173.4, 80.8, 80.6, 69.9, 68.9, 58.5, 58.0, 49.6, 49.4, 47.1, 46.9, 38.2, 37.6, 30.6, 29.5, 28.6, 28.3, 24.8, 23.9, 23.7, 23.5, 22.4, 22.2. [M + H]<sup>+</sup> C<sub>16</sub>H<sub>27</sub>N<sub>2</sub>O<sub>5</sub><sup>+</sup>: 327.1923; found: 327.1830.

**Procedure for solution peptide synthesis of H-dPro-MePro-Glu-NHC<sub>12</sub>H<sub>25</sub> 2:**

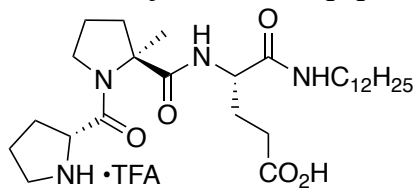

Boc-dPro-MePro-OH (0.88 g, 2.40 mmol, 1.0 equiv) and EDC•HCl (0.57 g, 2.96 mmol, 1.2 equiv.) were suspended in EtOAc (30 mL) and <sup>i</sup>Pr<sub>2</sub>NEt (0.92 mL, 2.2 equiv.). After stirring for 5 min at room temperature H-Glu-NHC<sub>12</sub>H<sub>25</sub> (1.00 g, 2.70 mmol, 1.0 equiv.) was added and the suspension was stirred at room temperature overnight. The reaction mixture was diluted with EtOAc (20 mL), washed with 0.1 M HCl (2x 5 mL), 5% w/w aq. Na<sub>2</sub>CO<sub>3</sub> (5 mL) and brine (5 mL). The solution was dried over MgSO<sub>4</sub> and the solvent was removed under reduced pressure to give a yellowish oil which was purified by flash column chromatography on silica gel eluting with 1-5% MeOH in CH<sub>2</sub>Cl<sub>2</sub>. The protected peptide was dissolved in TFA/CH<sub>2</sub>Cl<sub>2</sub> 2:1 (14 mL) and the mixture was stirred at room temperature for 30 min. Removal of all volatiles and precipitation from cold Et<sub>2</sub>O yielded the desired product as a colorless solid (0.91 mg, 56 %). <sup>1</sup>H NMR (400 MHz, CDCl<sub>3</sub>) δ = 8.84 (d, *J* = 7.1 Hz, 1H), 6.82 (t, *J* = 5.6 Hz, 1H), 4.80 – 4.71 (m, 1H), 4.44 – 4.35 (m, 1H), 3.95 – 3.85 (m, 1H), 3.81 – 3.70 (m, 1H), 3.65 – 3.54 (m, 1H), 3.42 – 3.31 (m, 1H), 3.30 – 3.14 (m, 1H), 2.64 – 2.21 (m, 6H), 2.15 – 1.86 (m, 4H), 1.83 – 1.72 (m, 1H), 1.64 (s, 3H), 1.53 – 1.42 (m, 2H), 1.33 – 1.19 (brs, 20H), 0.87 (td, *J* = 7.0, 2.3 Hz, 3H) (Mixture of *trans/cis* conformers in a ratio of > 30:1). <sup>13</sup>C NMR (101 MHz, CDCl<sub>3</sub>) δ = 179.9, 171.2, 170.1, 168.7, 77.5, 77.2, 76.8, 69.7, 59.8, 53.6, 49.1, 47.0, 39.7, 39.6, 32.1, 30.2, 30.1, 29.8, 29.8, 29.8, 29.6, 29.5, 29.1, 27.1, 25.7, 25.0, 23.6, 22.8, 21.9, 14.3. HRMS (ESI): *m/z* calcd. for [M + H]<sup>+</sup> C<sub>28</sub>H<sub>51</sub>N<sub>4</sub>O<sub>5</sub><sup>+</sup>: 523.3854; found: 523.3850.

Peptide **2a** was prepared on solid phase using Rink Amide resin. The general protocol for Fmoc/*t*Bu peptide synthesis was followed according to the general procedures below:

**General procedure for peptide couplings:** <sup>i</sup>Pr<sub>2</sub>NEt (6 equiv.) was added to a solution of Fmoc-Xaa-OH (3 equiv.) and HATU (3 equiv.) in DMF. The solution of the activated amino acid (≈ 100 mM) was added to the amino-functionalized resin (preswollen in CH<sub>2</sub>Cl<sub>2</sub>) and the mixture was agitated for 1 h before washing with DMF (3x) and CH<sub>2</sub>Cl<sub>2</sub> (3x).

**General procedure for Fmoc-deprotections:** A solution of 20% piperidine in DMF was added to the resin (preswollen in CH<sub>2</sub>Cl<sub>2</sub>) and the reaction mixture was agitated for 10 min, drained and the piperidine treatment was repeated for 10 min. Finally, the resin was washed with DMF (3x) and CH<sub>2</sub>Cl<sub>2</sub> (3x).

**General procedure for side chain deprotection and cleavage of the peptides from the solid support:** The peptides were side-chain deprotected and cleaved from the resin by shaking in a mixture of TFA/TIS/H<sub>2</sub>O (95:2.5:2.5) for 1 h and a second time for 30 min. Pooling of the filtrates and removal of all volatiles under reduced pressure followed by precipitation and thorough washing with Et<sub>2</sub>O afforded the peptides as their TFA-salts. The peptides were redissolved in MeCN/H<sub>2</sub>O 1:1, dried by lyophilisation and used without further purification.



***H*-dPro-MePro-Glu-NH<sub>2</sub>•TFA (2a):** Only the signals of the *trans* isomer are reported.

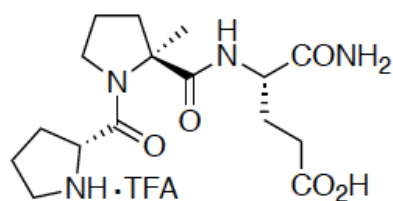

<sup>1</sup>H NMR (400 MHz, CDCl<sub>3</sub>/CD<sub>3</sub>OH 9:1)  $\delta$  = 8.83 (d, *J* = 7.0 Hz, 1H), 7.14 (s, 1H), 6.28 (s, 1H), 4.71 (dd, *J* = 8.9, 6.7 Hz, 1H), 4.35 (td, *J* = 7.2, 2.8 Hz, 1H), 3.92 (dt, *J* = 10.2, 6.2 Hz, 1H), 3.60 (dt, *J* = 10.0, 7.2 Hz, 1H), 3.54 (dt, *J* = 11.2, 6.8 Hz, 1H), 3.41 – 3.32 (m, 1H), 2.68 – 2.44 (m, 3H), 2.30 (q, *J* = 5.8 Hz, 1H), 2.24 – 2.14 (m, 2H), 2.13 – 1.82 (m, 6H), 1.59 (s, 3H). <sup>13</sup>C NMR (101 MHz, CDCl<sub>3</sub>/CD<sub>3</sub>OH 9:1)  $\delta$  = 178.7, 174.8, 173.0, 168.5, 68.8, 59.4, 53.6, 48.7, 46.8, 39.4, 30.2, 29.1, 25.0, 24.8, 23.7, 21.2. HRMS (MALDI): *m/z* calcd. for [M + H]<sup>+</sup> C<sub>16</sub>H<sub>27</sub>N<sub>4</sub>O<sub>5</sub><sup>+</sup>: 355.1976; found: 355.1976.

## <sup>1</sup>H and <sup>13</sup>C NMR Spectra

<sup>1</sup>H NMR Spectrum (400 MHz) of H-Glu(O<sup>t</sup>Bu)-NHC<sub>12</sub>H<sub>25</sub> recorded in CDCl<sub>3</sub>:

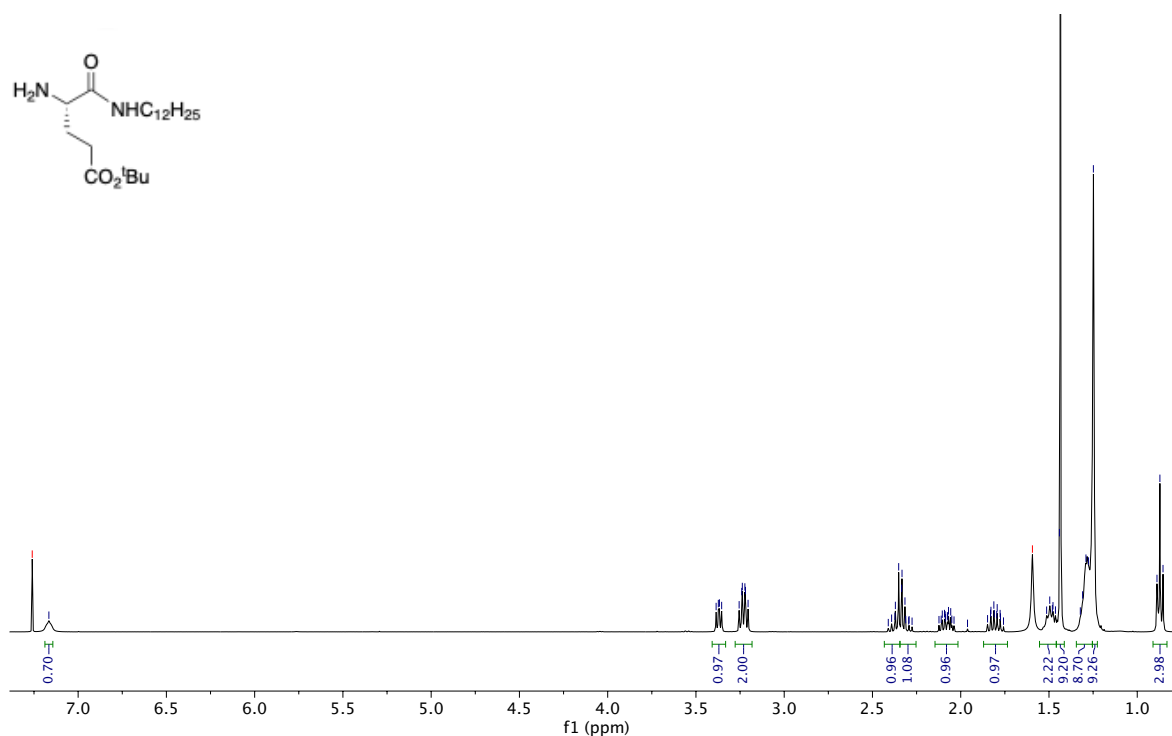

$^1\text{H}$  NMR Spectrum (400 MHz) of Boc-DPro-MePro-OH recorded in  $\text{CDCl}_3$ :

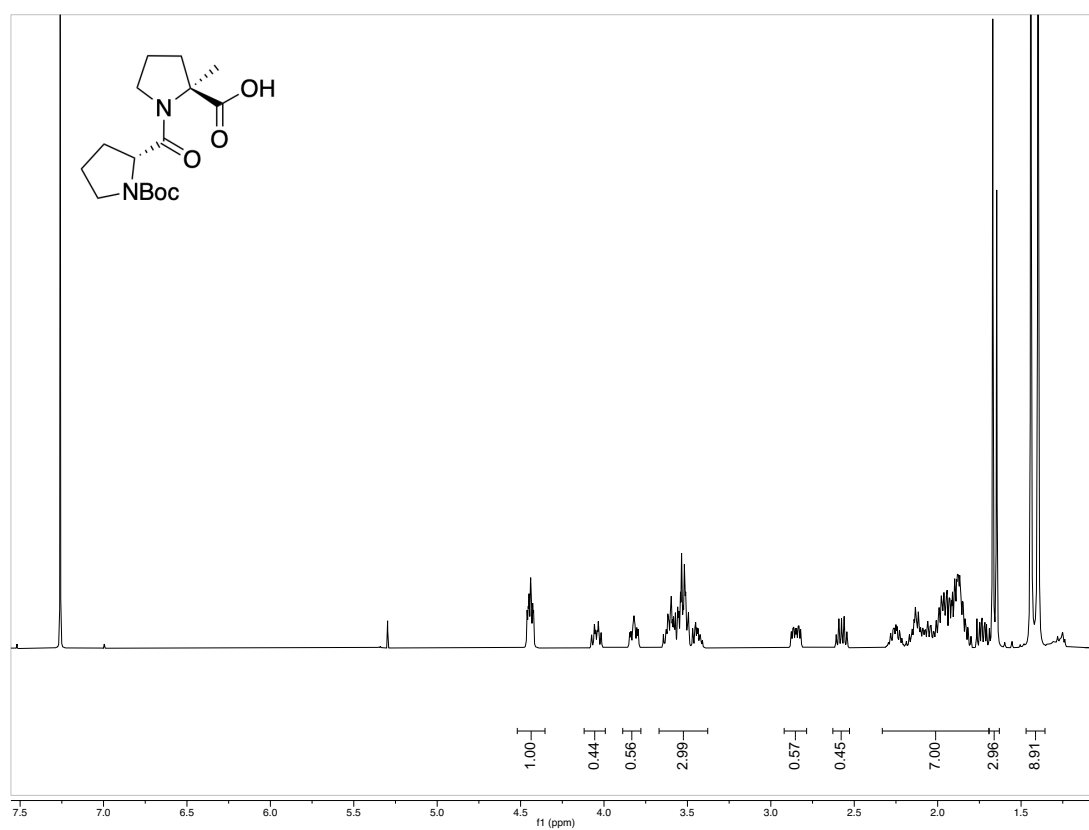

$^{13}\text{C}$  NMR Spectrum (126 MHz) of Boc-DPro-MePro-OH recorded in  $\text{CDCl}_3$ :

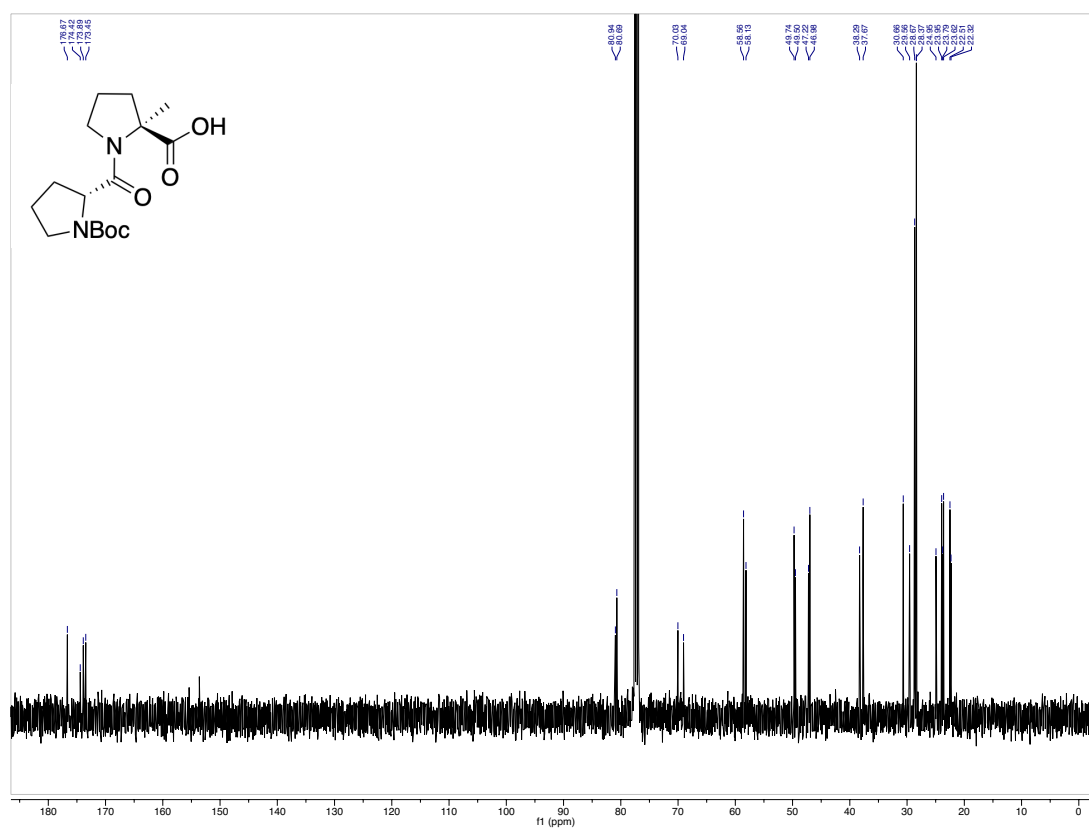

$^1\text{H}$  NMR Spectrum (400 MHz) of H-DPro-MePro-Glu-NHC<sub>12</sub>H<sub>25</sub> **2** in CDCl<sub>3</sub>:

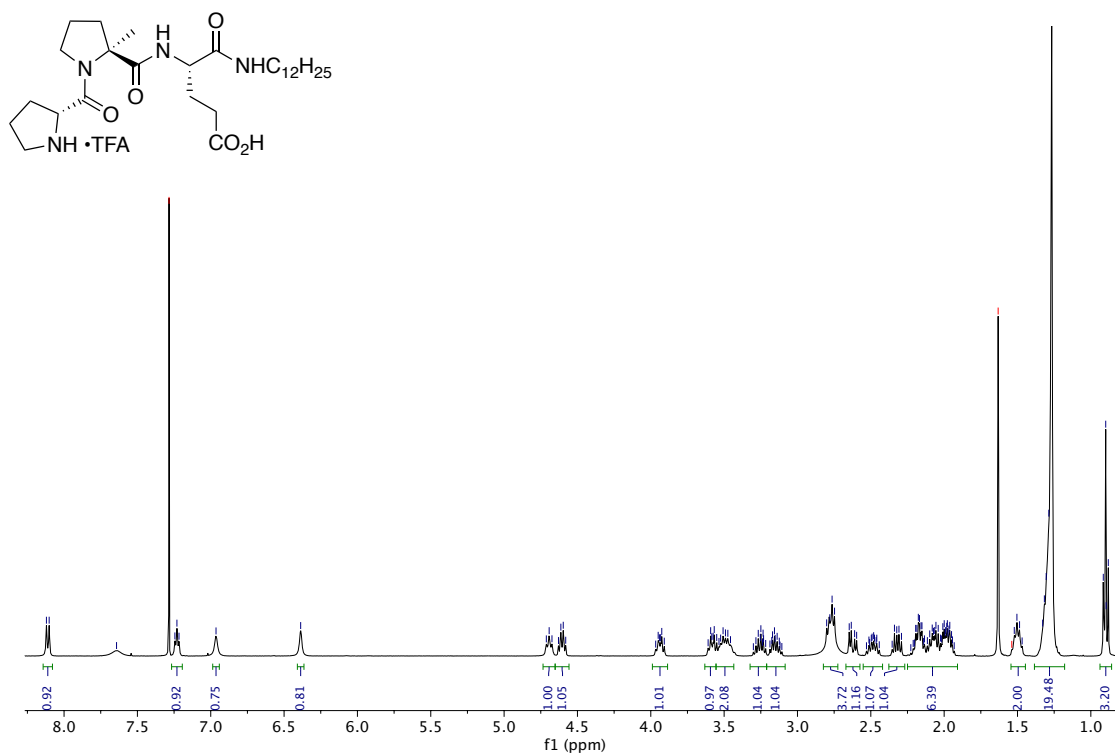

$^{13}\text{C}$  NMR Spectrum (125 MHz) of H-DPro-MePro-Glu-NHC<sub>12</sub>H<sub>25</sub> **2** in CDCl<sub>3</sub>:

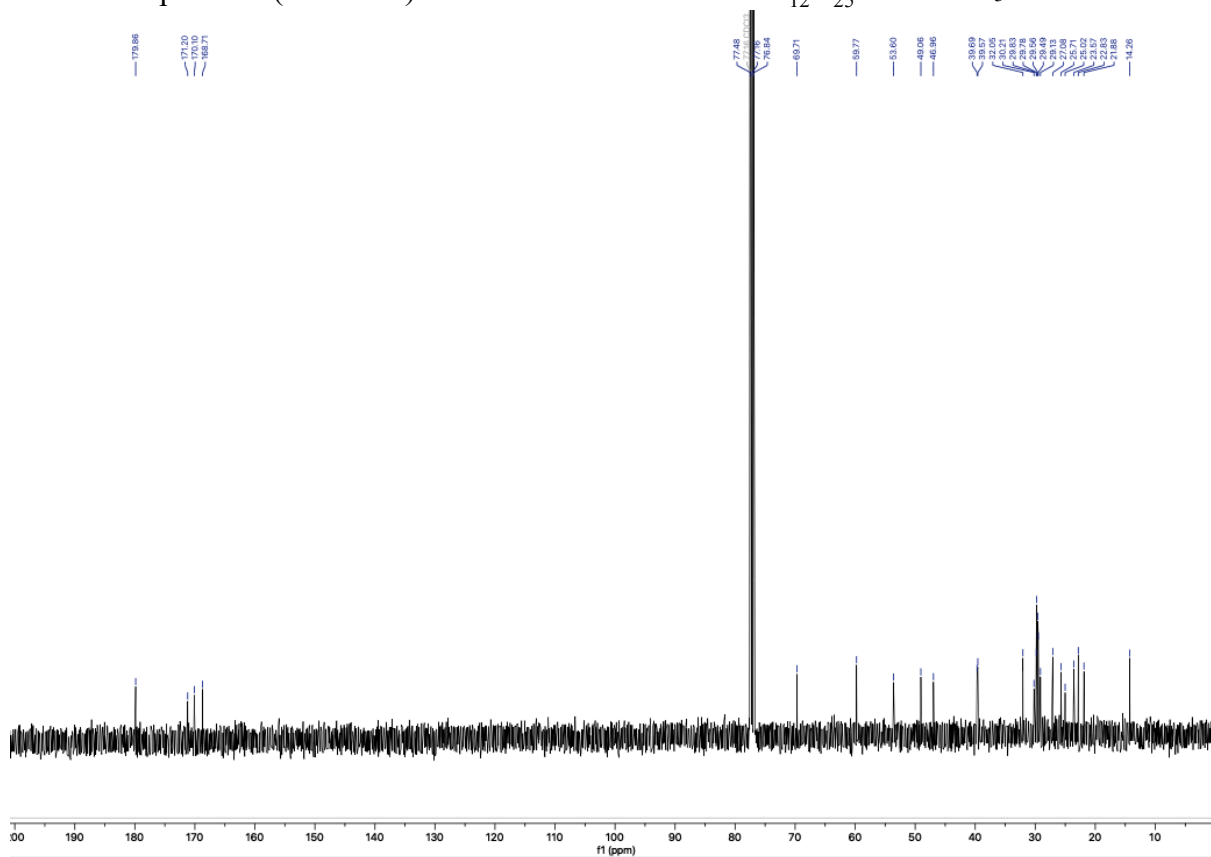

$^1\text{H}$  NMR Spectrum (400 MHz) of H-DPro-MePro-Glu-NH<sub>2</sub> recorded in CDCl<sub>3</sub>/CD<sub>3</sub>OH 9:1:  
(the peak of CD<sub>3</sub>OH was suppressed)

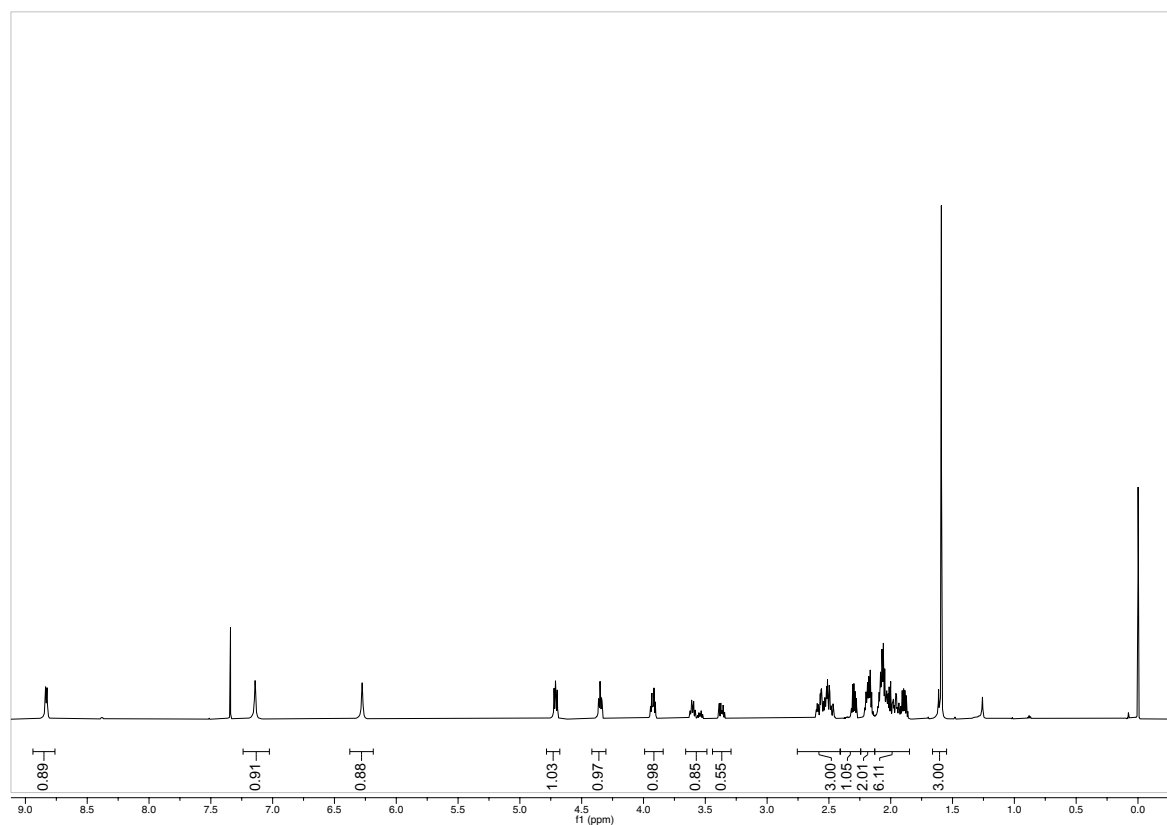

$^{13}\text{C}$  NMR Spectrum (150 MHz) of H-DPro-MePro-Glu-NH<sub>2</sub> recorded in CDCl<sub>3</sub>/CD<sub>3</sub>OH 9:1:

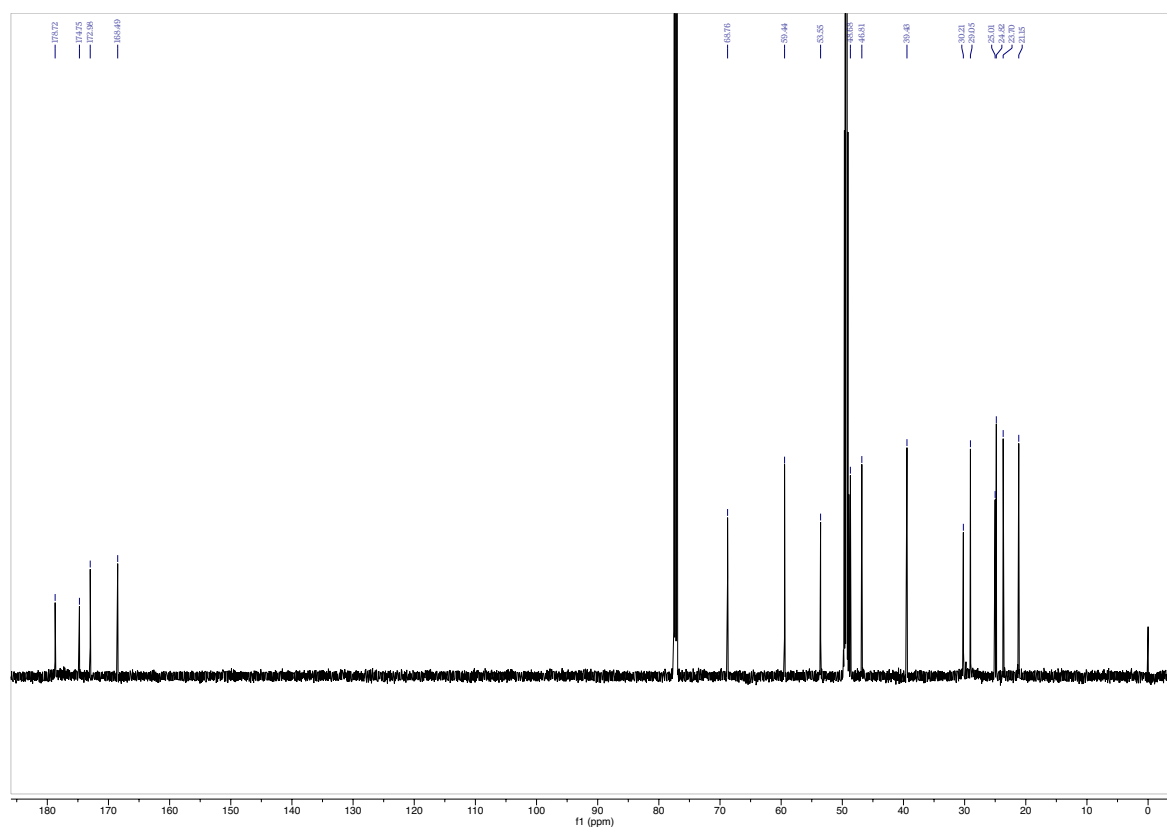

### 3. ROESY spectrum of **2a**

The ROESY NMR spectrum of peptide **2a** was recorded in CDCl<sub>3</sub>/CD<sub>3</sub>OH 9:1, a solvent in which the population of the minor (*cis*) conformer is low and in which only the characteristic cross peaks for the major (*trans*) conformer are clearly visible. Note, **1a** has been intensively studied in this solvent mixture,<sup>3</sup> allowing for comparison of the conformation of **1a** and **2a**.

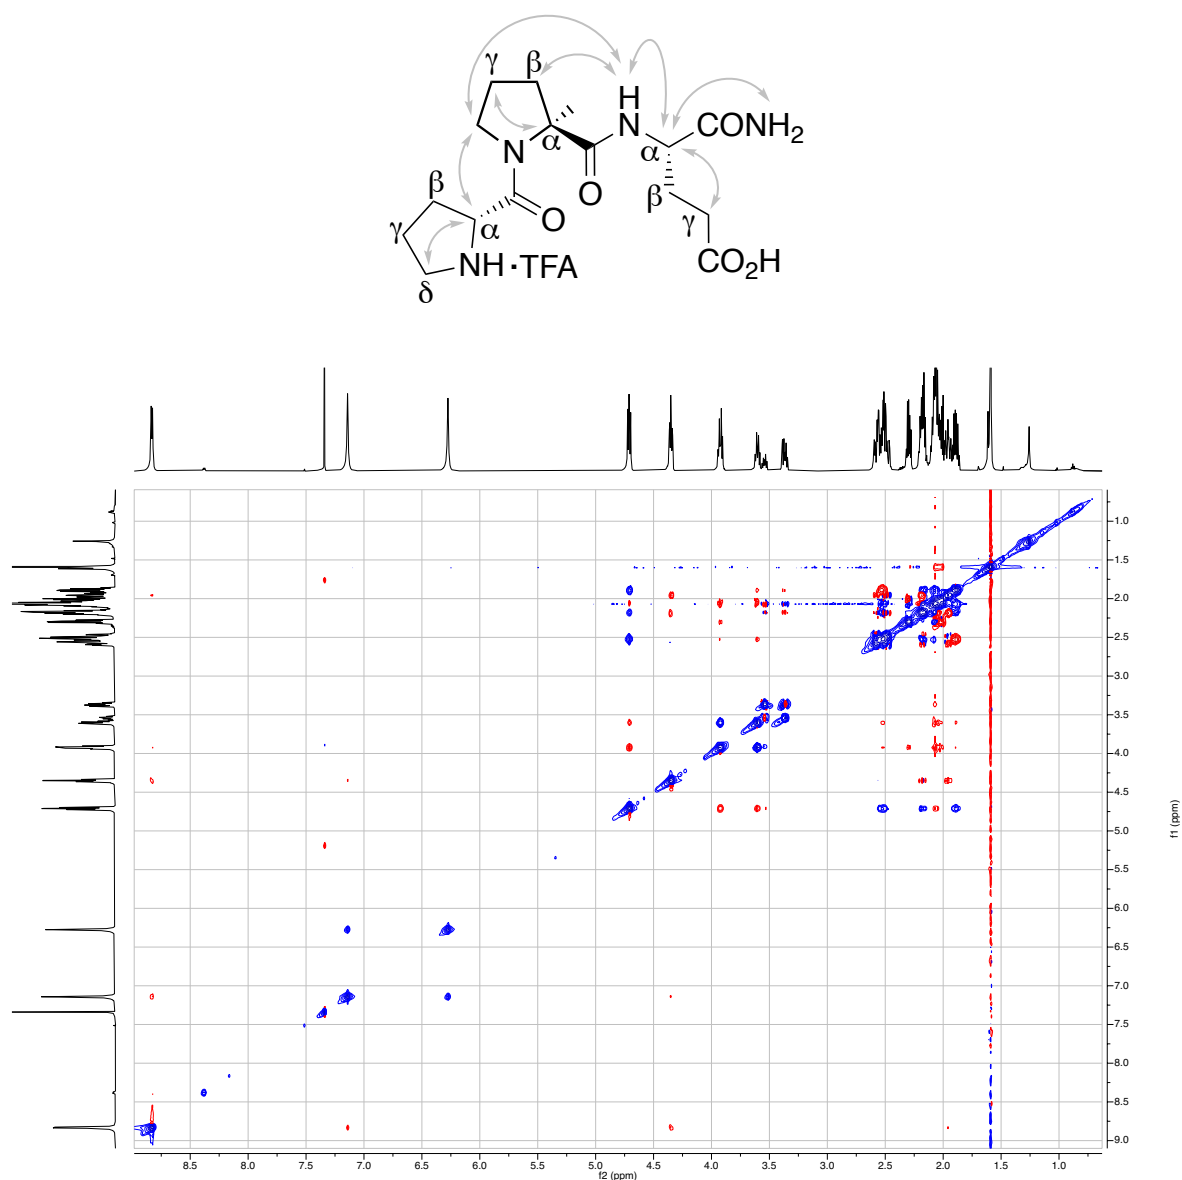

#### 4. Crystal Structure of H-DPro-MePro-Glu-NH<sub>2</sub> (2a)

Single crystals of **2a** were obtained by vapor diffusion with MeOH as the solvent and THF as the antisolvent. A suitable crystal was selected and measured on a Bruker/Nonius ApexII diffractometer. The crystal was kept at 100.0(2) K during data collection. Using Olex2,<sup>4</sup> the structure was solved with the XT<sup>5</sup> structure solution program using Charge Flipping and refined with the XL<sup>6</sup> refinement package using Least Squares minimization.

Deposit number in CCSD: 2152664.

Left: ORTEP representation of the crystal structure of **2a**. Right: Overlay of the crystal structures of **1a**<sup>7</sup> and **2a**.

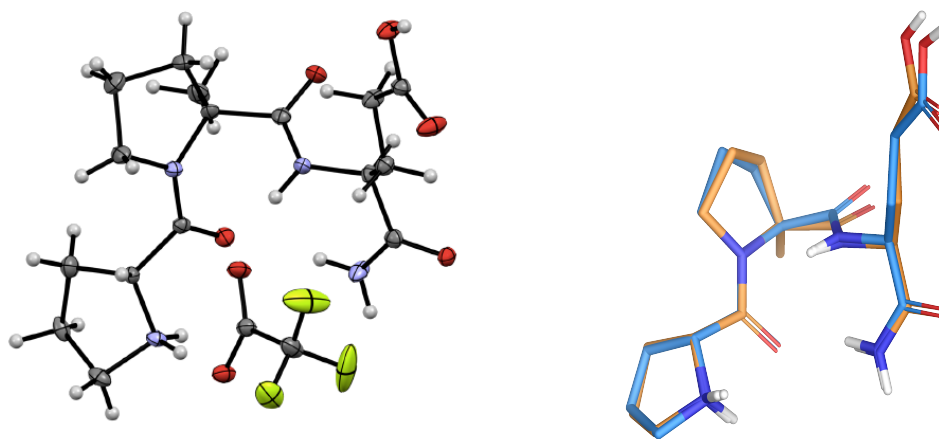

Identification code w021016\_2\_1  
Empirical formula C<sub>18</sub>H<sub>27</sub>F<sub>3</sub>N<sub>4</sub>O<sub>7</sub>  
Formula weight 468.43  
Temperature/K 100.0(1)  
Crystal system monoclinic  
Space group P21  
a/ 18.0201(3)  
b/ 14.3179(2)  
c/ 18.0259(3)  
 $\alpha$ / 90  
 $\beta$ / 111.0260(10)  
 $\gamma$ / 90  
Volume/ 3 4341.20(12)  
Z 8  
 $\rho_{\text{calc}}/\text{cm}^3$  1.433  
 $\mu/\text{mm}^{-1}$  1.096  
F(000) 1968.0  
Crystal size/mm<sup>3</sup> 0.12 0.1 0.08  
Radiation CuK $\alpha$  ( $\lambda$  = 1.54178)  
2 $\theta$  range for data collection/ 5.252 to 133.404  
Index ranges -18  $\leq$  h  $\leq$  21, -16  $\leq$  k  $\leq$  17, -21  $\leq$  l  $\leq$  18  
Reflections collected 57508  
Independent reflections 14865 [R<sub>int</sub> = 0.0336, R<sub>sigma</sub> = 0.0287]  
Data/restraints/parameters 14865/193/1253  
Goodness-of-fit on F<sup>2</sup> 1.016  
Final R indexes [ $I \geq 2\sigma(I)$ ] R<sub>1</sub> = 0.0273, wR<sub>2</sub> = 0.0699  
Final R indexes [all data] R<sub>1</sub> = 0.0277, wR<sub>2</sub> = 0.0703  
Largest diff. peak/hole / e<sup>-</sup> -3 0.36/-0.22  
Flack parameter 0.08(4)

## 5. Conjugate Addition Reaction with Peptides **1a** and **2a** in Organic Solvents

**Reaction procedure:** The peptide-TFA salt (1 mol%, 2.5  $\mu$ mol) was added to a solution of *N*-methylmorpholine (1 mol%, 2.5  $\mu$ mol), (*E*)-nitrostyrene (1 equiv., 250  $\mu$ mol, 37.3 mg) and butanal (1.5 equiv., 375  $\mu$ mol, 33.8  $\mu$ l) in the respective solvent (0.5 ml). The reaction mixture was stirred for 2 h. The conversion and diastereoisomeric ratio were determined by  $^1\text{H}$  NMR spectroscopy of the crude mixture by comparison of the aldehyde R-CHO signals. The enantiomeric excess was determined by chiral stationary phase SFC (AD-3, 5% MeOH, 2.0 ml/min, 40° C, 214 nm, 1.00 min (*syn*, minor), 1.21 min (*syn*, major)).

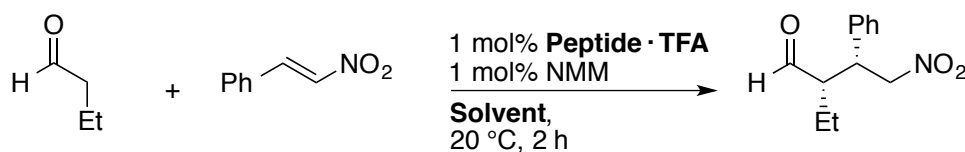

| Solvent                          | Peptide   | <i>trans</i> population <sup>a</sup> | d.r. <sup>b</sup> | <i>ee</i> (%) <sup>c</sup> | conv. (%) <sup>b</sup> |
|----------------------------------|-----------|--------------------------------------|-------------------|----------------------------|------------------------|
| $\text{CH}_2\text{Cl}_2$         | <b>1a</b> | 91                                   | 18:1              | 89                         | 23                     |
|                                  | <b>2a</b> | 95                                   | 34:1              | 98                         | 27                     |
| THF                              | <b>1a</b> | 88                                   | 31:1              | 84                         | 6                      |
|                                  | <b>2a</b> | 96                                   | 36:1              | 95                         | 18                     |
| Dioxane                          | <b>1a</b> | 89                                   | 17:1              | 85                         | 20                     |
|                                  | <b>2a</b> | 95                                   | 29:1              | 96                         | 33                     |
| MeOH                             | <b>1a</b> | 94                                   | 17:1              | 70                         | 36                     |
|                                  | <b>2a</b> | 95                                   | 29:1              | 85                         | 71                     |
| MeCN                             | <b>1a</b> | 95                                   | 19:1              | 80                         | 36                     |
|                                  | <b>2a</b> | 96                                   | 22:1              | 87                         | 64                     |
| DMF                              | <b>1a</b> | 78                                   | 15:1              | 63                         | 20                     |
|                                  | <b>2a</b> | 97                                   | 22:1              | 74                         | 42                     |
| DMSO                             | <b>1a</b> | 78                                   | 8:1               | 40                         | 60                     |
|                                  | <b>2a</b> | 96                                   | 14:1              | 77                         | 8                      |
| $\text{CHCl}_3/i\text{PrOH}$ 9:1 | <b>1a</b> | 98                                   | 35:1              | 97                         | quant.                 |
|                                  | <b>2a</b> | 96                                   | 54:1              | 98                         | quant.                 |

<sup>a</sup> Determined by  $^1\text{H}$  NMR spectroscopic analysis in the corresponding anhydrous deuterated solvent. Note: The *trans/cis* ratio depends on the water content of the deuterated solvent. <sup>b</sup> Determined after 2 hours by  $^1\text{H}$  NMR spectroscopic analysis of the crude product and comparison of the aldehyde signals. <sup>c</sup> Determined by chiral stationary phase SFC analysis. The *trans/cis* ratios of **1a** have been previously reported in ref 7.

**<sup>1</sup>H NMR spectroscopic analysis of *cis/trans* ratios:** <sup>1</sup>H NMR spectra of peptides **2a** were recorded at a concentration of ~5 mM, the concentration used in the conjugate addition reactions, or, in case of low solubility of the peptide in a saturated solution. No evidence for peptide aggregation was observed. The samples were equilibrated for at least 2 h and no changes of the *trans/cis* ratios over time were observed. The *trans/cis* ratios were determined by manual integration of baseline separated signals of the two spin systems.

**CDCl<sub>3</sub>/CD<sub>3</sub>OH 9:1:**

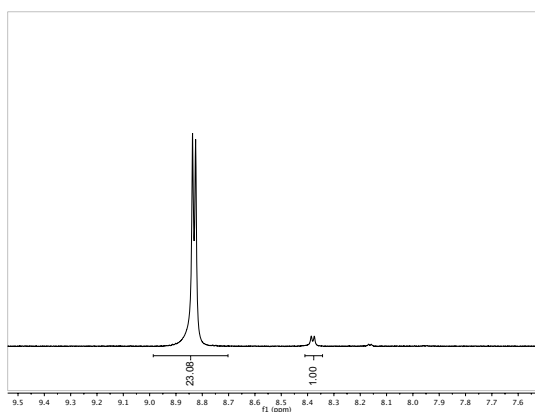

**CD<sub>2</sub>Cl<sub>2</sub>:**

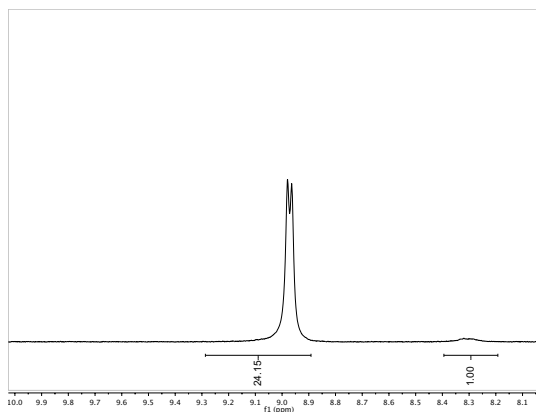

**d<sup>8</sup>-THF:**

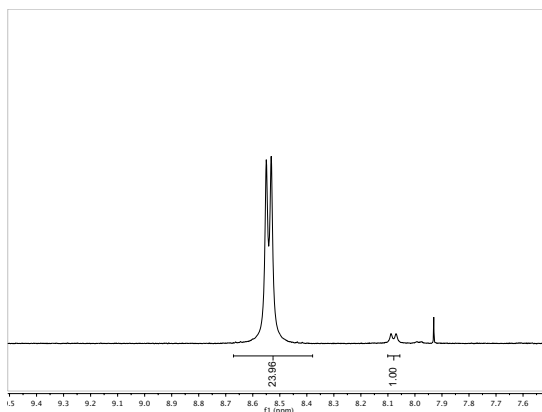

**d<sup>8</sup>-dioxane:**

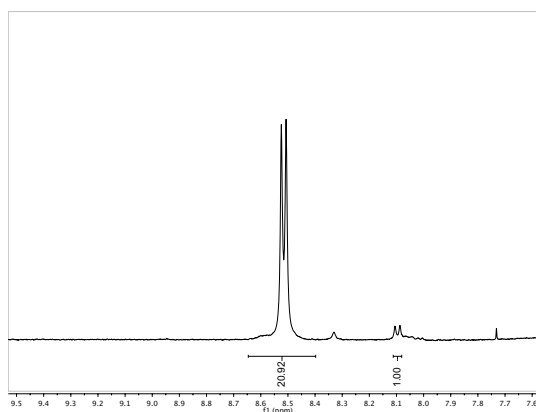



**CD<sub>3</sub>OH:**

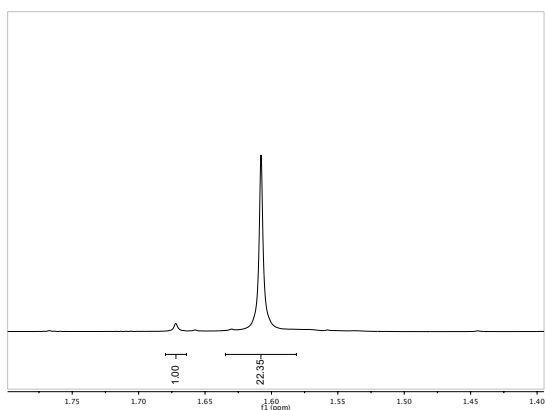

**CD<sub>3</sub>CN:**

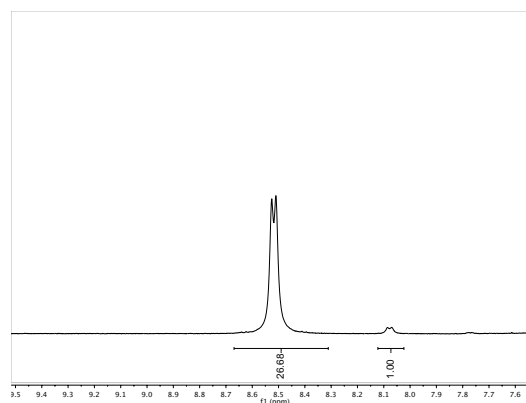

**d<sup>7</sup>-DMF:**

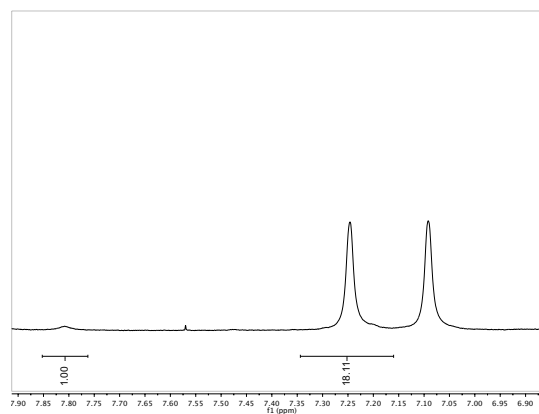

**d<sup>6</sup>-DMSO**

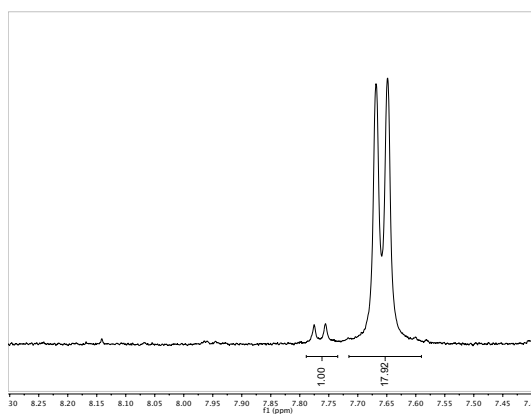

## 6. Conjugate Addition Reaction in the Presence of Additives

The peptide TFA salt (3 mol%) was added to a solution of *N*-methyldmorpholine (3 mol%, 1.45  $\mu$ L), (*E*)-nitrostyrene (2 equiv., 0.88 mmol, 65.6 mg) and butanal (1.0 equiv., 0.44 mmol, 99.1  $\mu$ L) in the respective solutions (1.0 mL, complex mixture or additive solution in water). The reaction mixture was sonicated until no more solid (nitroolefin) was observed and a stable emulsion was obtained (approximately 2 min). The resulting emulsion was vigorously stirred at room temperature. The conversion and diastereoisomeric ratio were determined by  $^1\text{H}$  NMR spectroscopic analysis of the crude mixture by comparison of the aldehyde R-CHO signals. The enantiomeric excess was determined by chiral stationary phase SFC (AD-3, 5% MeOH, 2.0 mL/min, 40  $^\circ\text{C}$ , 214 nm, 1.00 min (*syn*, minor), 1.21 min (*syn*, major)).

### Results of the reactions in the presence of additives:

| Additives   | Conversion <sup>a</sup> (%) |     |     |     | Major diastereomer <sup>a</sup> (%) |    |    |     | <i>ee</i> <sup>b</sup> (%) |    |    |     |
|-------------|-----------------------------|-----|-----|-----|-------------------------------------|----|----|-----|----------------------------|----|----|-----|
|             | Amount of additive (mol%)   |     |     |     | Amount of additive (mol%)           |    |    |     | Amount of additive (mol%)  |    |    |     |
|             | 3                           | 10  | 50  | 100 | 3                                   | 10 | 50 | 100 | 3                          | 10 | 50 | 100 |
| No additive | >95                         | -   | -   | -   | 98                                  | -  | -  | -   | 91                         | -  | -  | -   |
| A           | >95                         | >95 | >95 | >95 | 96                                  | 96 | 95 | 95  | 91                         | 89 | 90 | 91  |
| B           | >95                         | >95 | >95 | >95 | 95                                  | 91 | 68 | 66  | 91                         | 90 | 88 | 88  |
| C           | >95                         | >95 | >95 | >95 | 97                                  | 96 | 96 | 96  | 91                         | 91 | 91 | 90  |
| D           | >95                         | >95 | >95 | >95 | 97                                  | 96 | 97 | 96  | 90                         | 90 | 91 | 91  |
| E           | >95                         | >95 | >95 | >95 | 96                                  | 97 | 96 | 96  | 91                         | 91 | 90 | 91  |
| F           | >95                         | >95 | >95 | >95 | 96                                  | 96 | 95 | 96  | 90                         | 91 | 91 | 91  |
| G           | >95                         | >95 | >95 | >95 | 97                                  | 96 | 97 | 97  | 91                         | 91 | 91 | 91  |
| H           | >95                         | >95 | >95 | >95 | 96                                  | 95 | 93 | 94  | 91                         | 89 | 88 | 87  |
| I           | >95                         | >95 | >95 | >95 | 96                                  | 96 | 96 | 94  | 90                         | 90 | 90 | 90  |
| J           | >95                         | >95 | >95 | >95 | 96                                  | 96 | 96 | 96  | 90                         | 90 | 89 | 88  |
| K           | >95                         | >95 | >95 | >95 | 96                                  | 97 | 97 | 97  | 90                         | 92 | 91 | 91  |
| L           | >95                         | >95 | >95 | >95 | 97                                  | 97 | 98 | 98  | 90                         | 90 | 91 | 91  |
| M           | >95                         | >95 | >95 | >95 | 96                                  | 97 | 97 | 96  | 92                         | 91 | 89 | 88  |
| N           | >95                         | 93  | 56  | 36  | 97                                  | 97 | 98 | 98  | 90                         | 90 | 90 | 90  |
| O           | 81                          | 84  | 37  | 24  | 98                                  | 98 | 98 | 98  | 91                         | 91 | 92 | 92  |
| P           | >95                         | >95 | >95 | >95 | 94                                  | 92 | 85 | 78  | 89                         | 90 | 90 | 83  |

<sup>a</sup>Determined by  $^1\text{H}$  NMR spectroscopic analysis of the crude mixture. <sup>b</sup>Determined by chiral stationary phase SFC analysis.

## <sup>1</sup>H NMR spectra:

A sample of 50  $\mu\text{L}$  from the crude reaction mixture was added to an NMR tube that contained 600  $\mu\text{L}$   $\text{CDCl}_3$ . Vigorous shaking / vortexing ensured extraction of the reaction products from the mixture. Conversion was determined by comparing the integrals of the olefinic signal of nitrostyrene and the  $\text{RCHO}$  signals of the  $\gamma$ -nitroaldehyde. The diastereomeric ratio was determined by integration of the  $\text{RCHO}$  signals of the  $\gamma$ -nitroaldehyde. Below an exemplary spectrum of the reaction with glycine is listed, for all other additives only a section.

### Exemplary spectrum of the reaction with 100 mol% glycine:

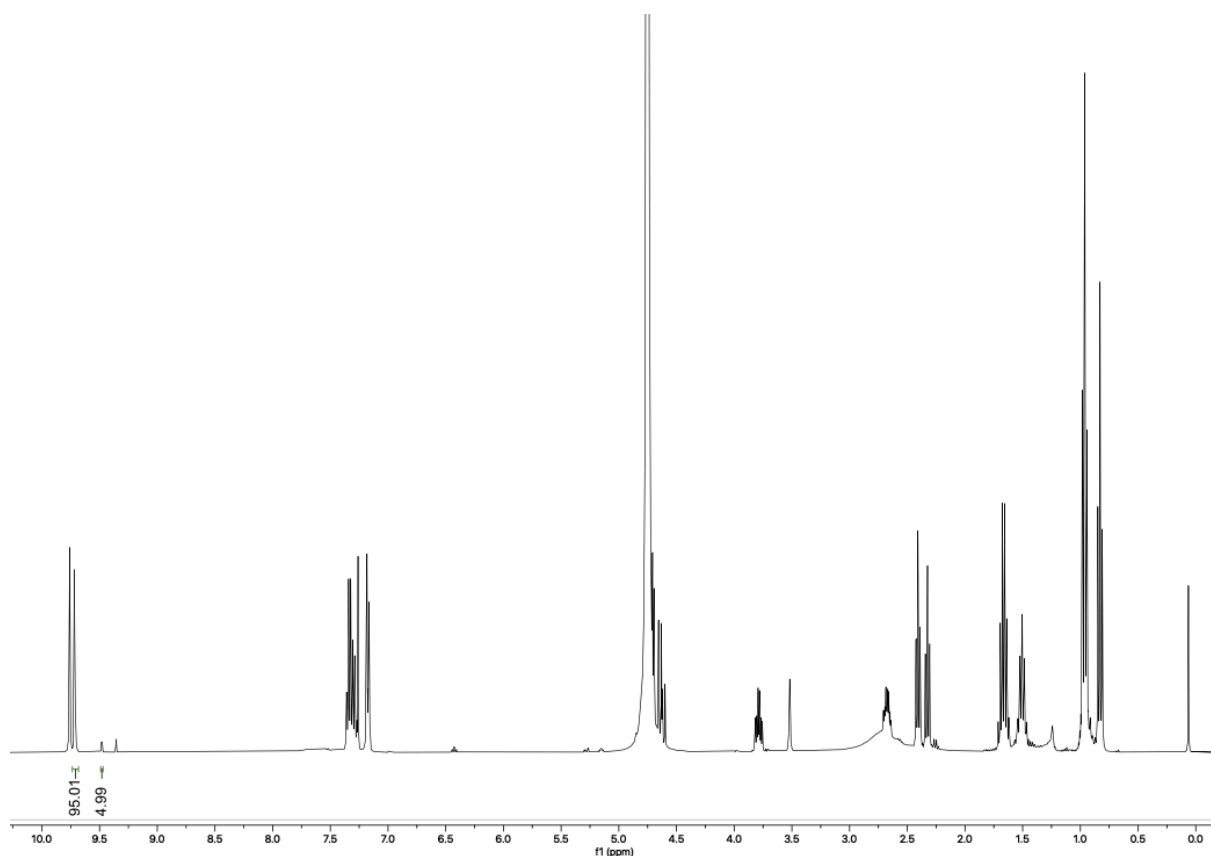

### Additive A (Glycine):

3 mol%:

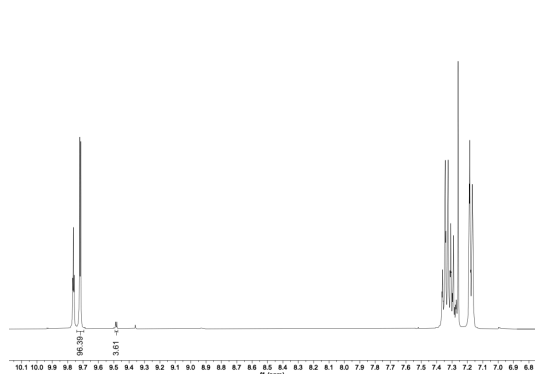

10 mol%:

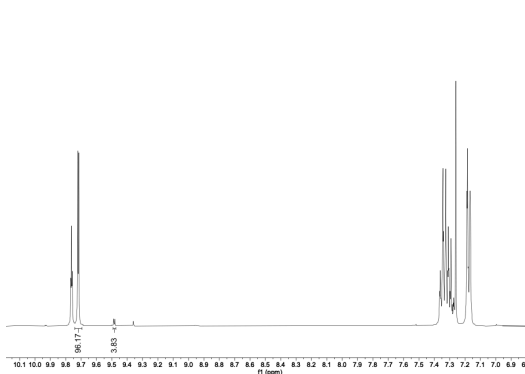

50 mol%:

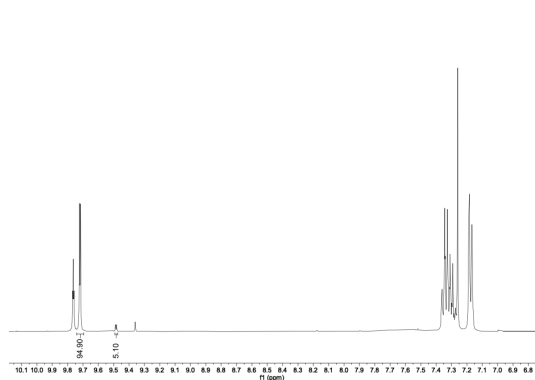

100 mol%:

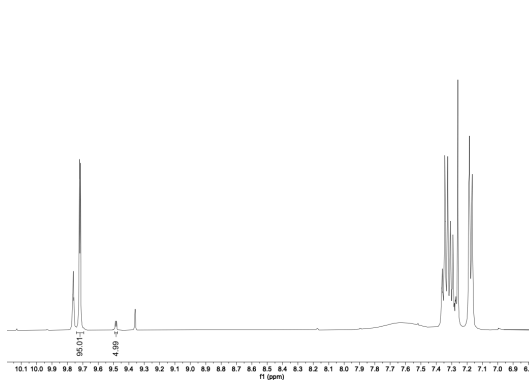

**Additive B (Phenylalanine):**

3 mol%:

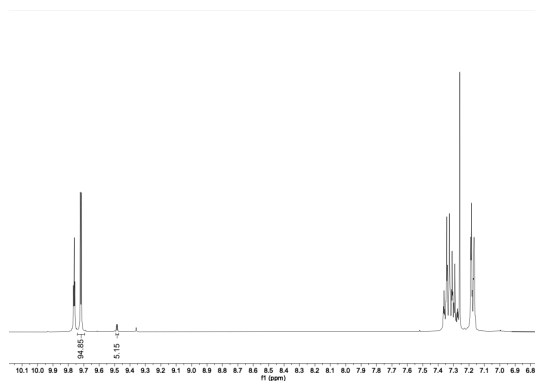

10 mol%:

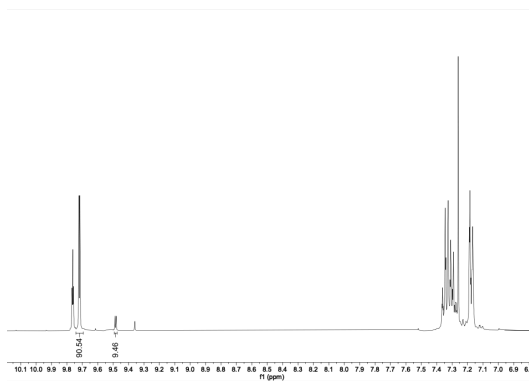

50 mol%:

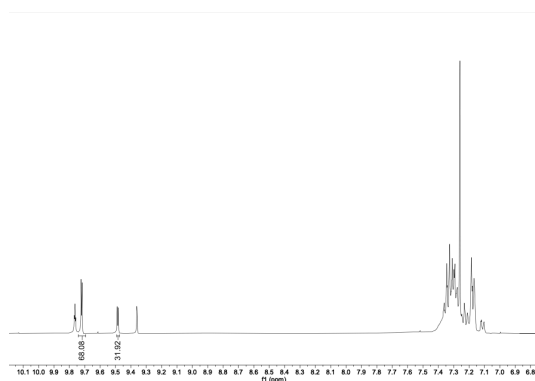

100 mol%:

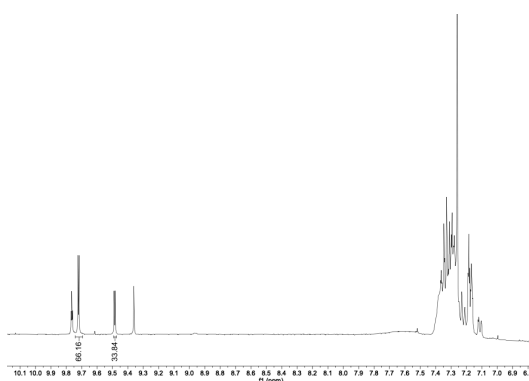

### Additive C (Glucose):

3 mol%:

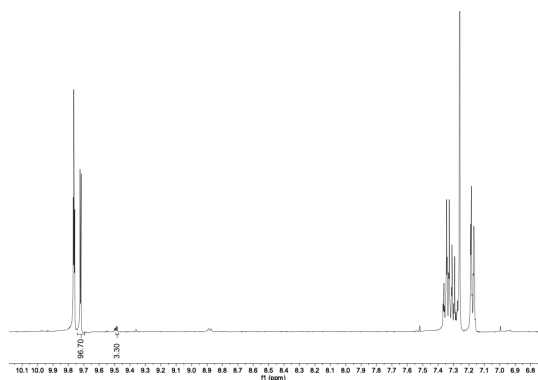

10 mol%:

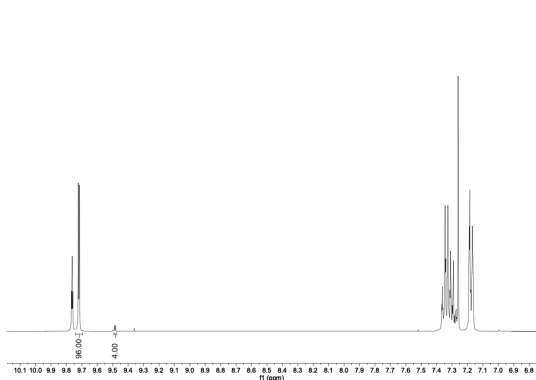

50 mol%:

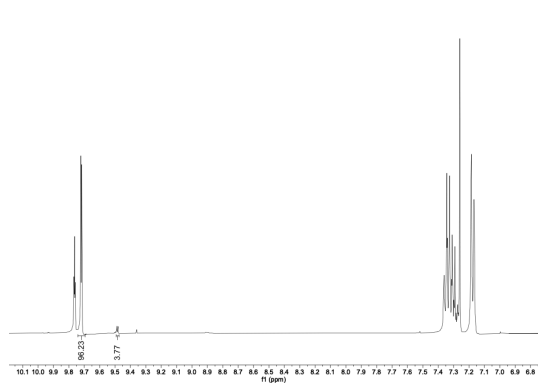

100 mol%:

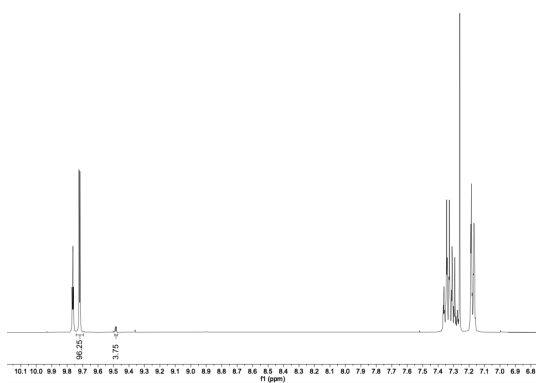

### Additive D (Fructose):

3 mol%:

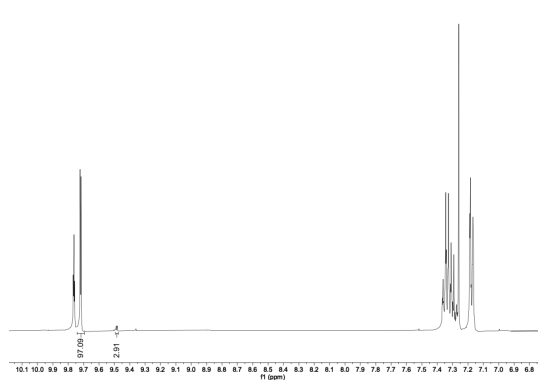

10 mol%:

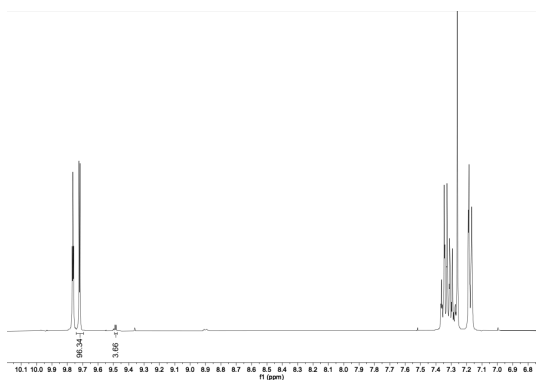

50 mol%:

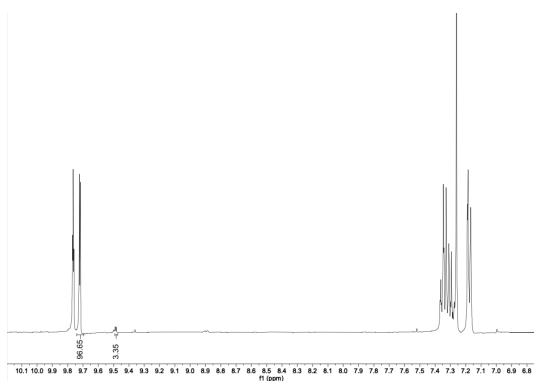

100 mol%:

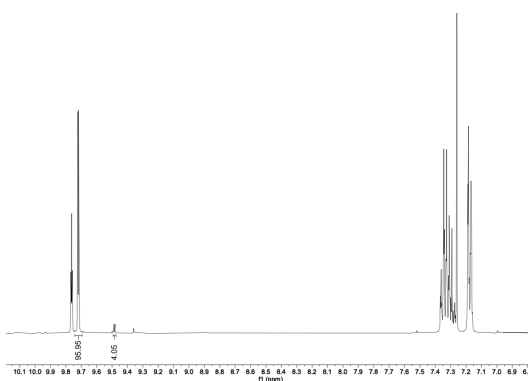

**Additive E (Lactose):**

3 mol%:

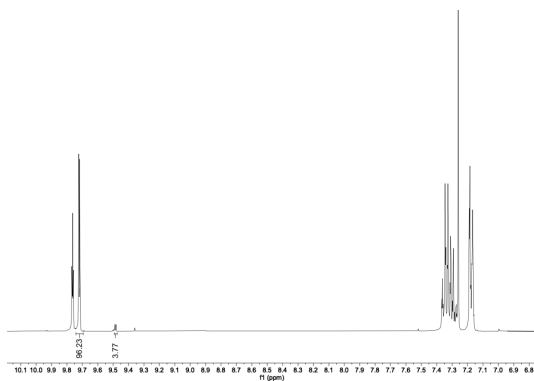

10 mol%:

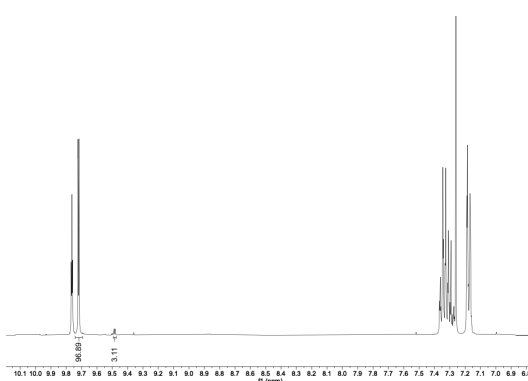

50 mol%:

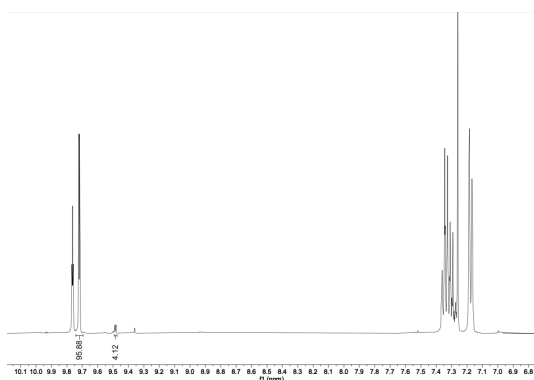

100 mol%:

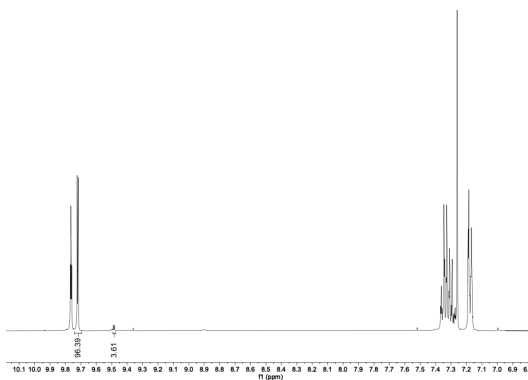

### Additive F (Adenine):

3 mol%:

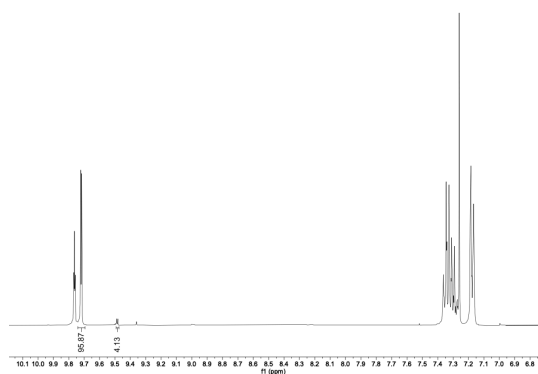

10 mol%:

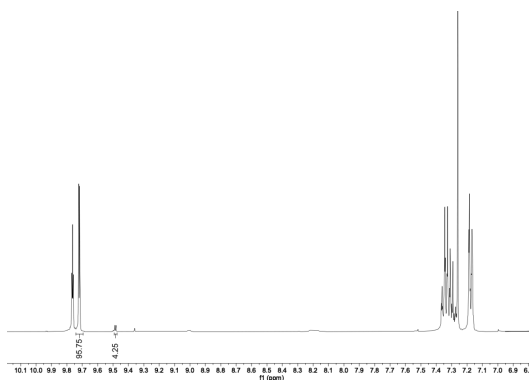

50 mol%:

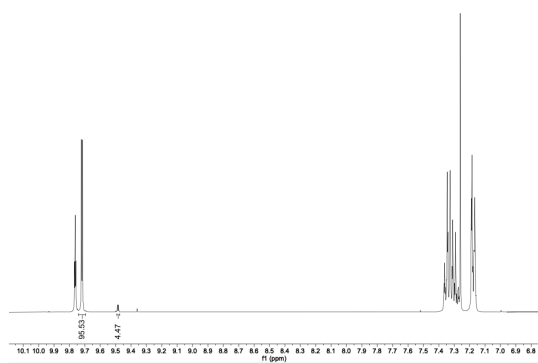

100 mol%:

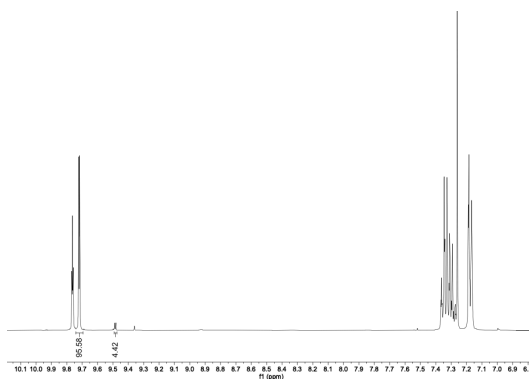

### Additive G (Guanosine):

3 mol%:

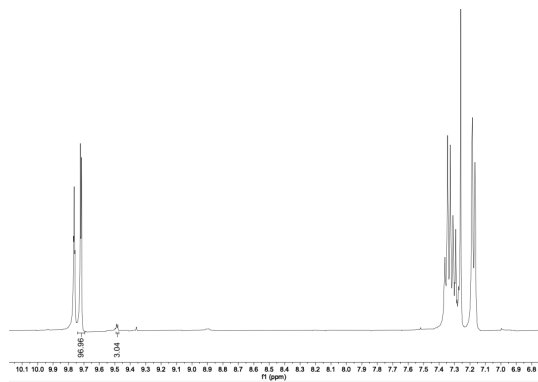

10 mol%:

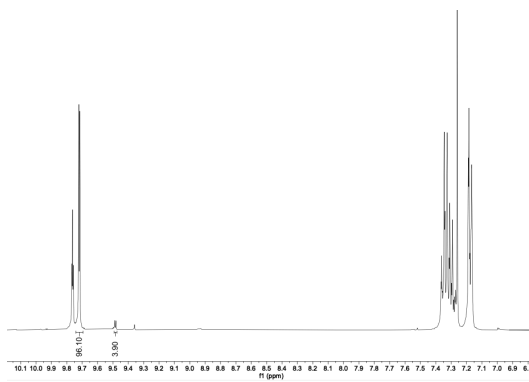

50 mol%:

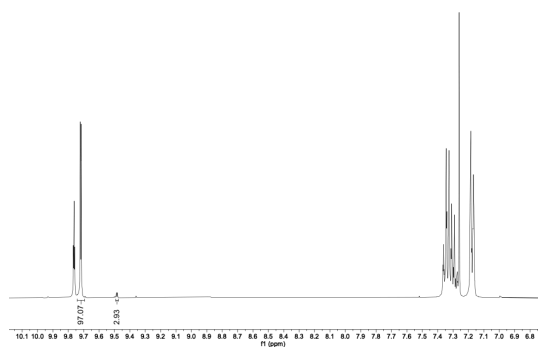

100 mol%:

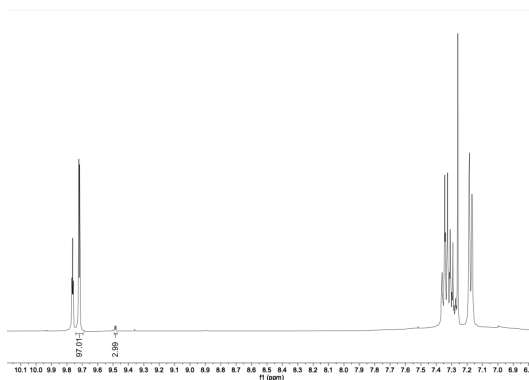

**Additive H (Thymidine-5'-monophosphoric acid):**

3 mol%:

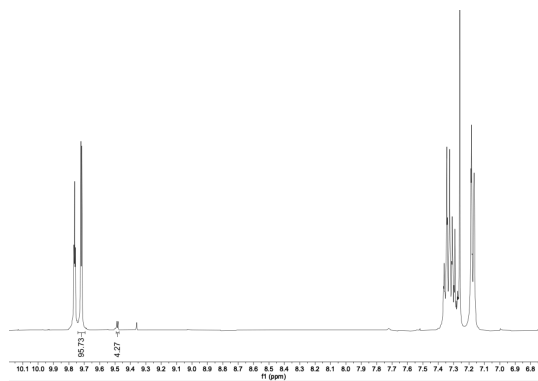

10 mol%:

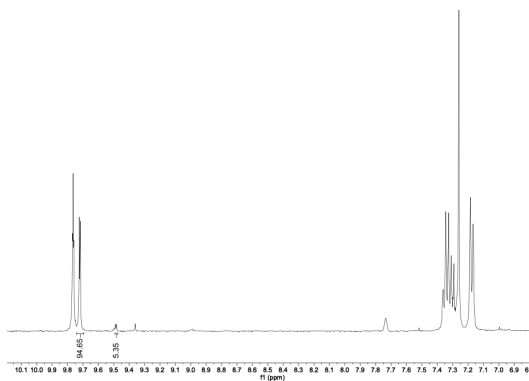

50 mol%:

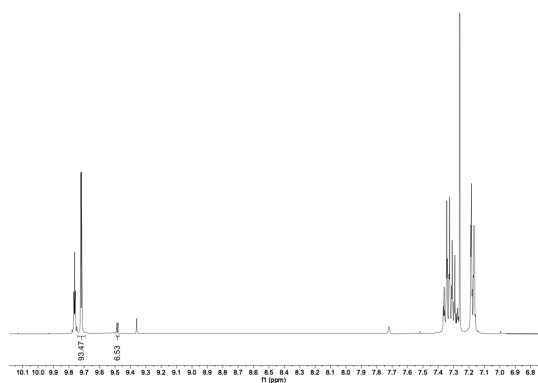

100 mol%:

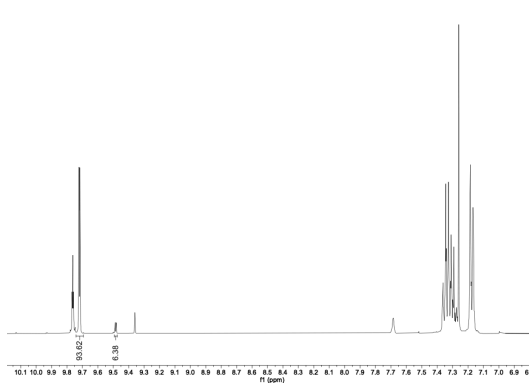



### Additive I (Tristearine):

3 mol%:

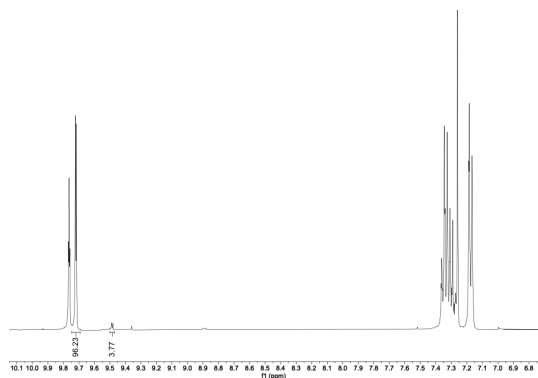

10 mol%:

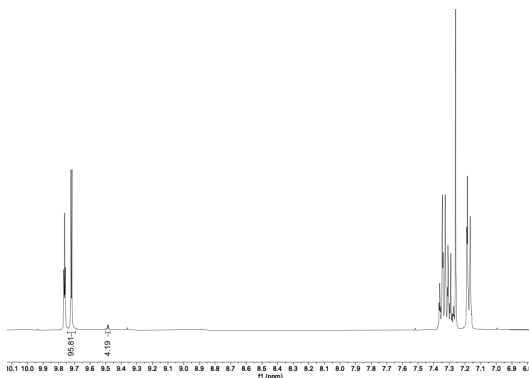

50 mol%:

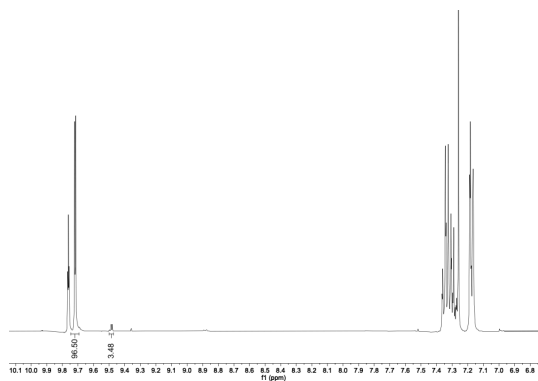

100 mol%:

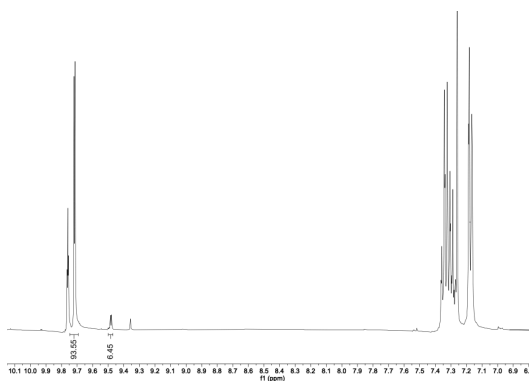

### Additive J (Squalene):

3 mol%:

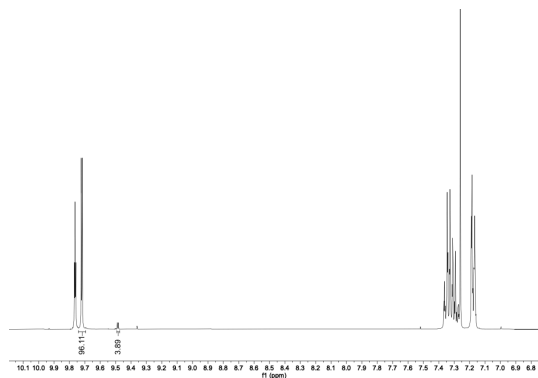

10 mol%:

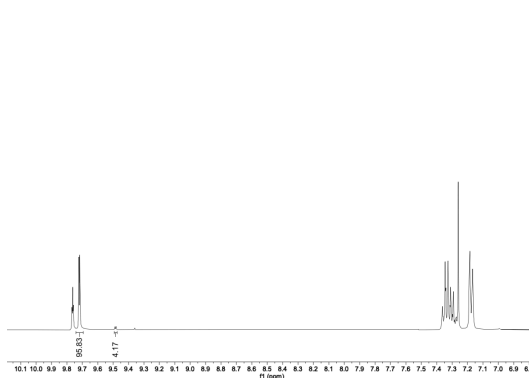

50 mol%:

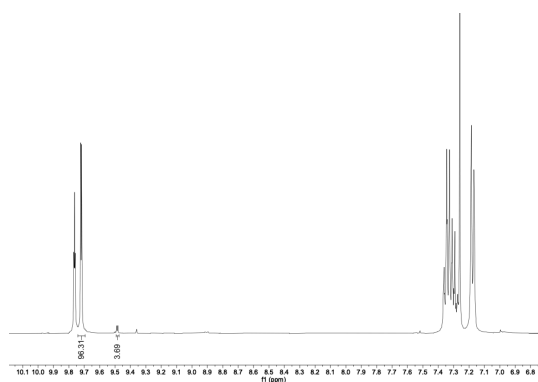

100 mol%:

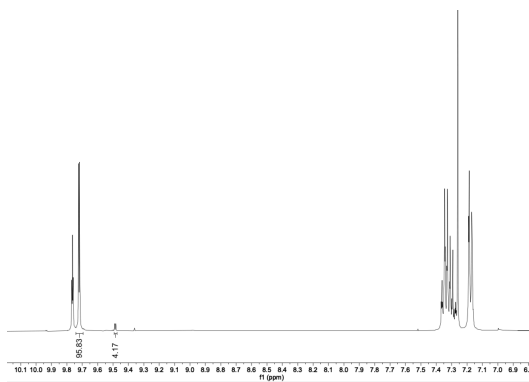

**Additive K (Cholesterol):**

3 mol%:

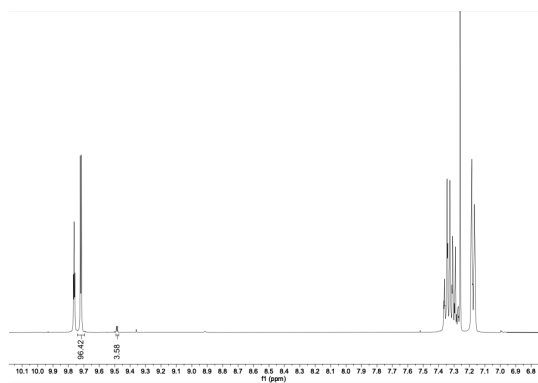

10 mol%:

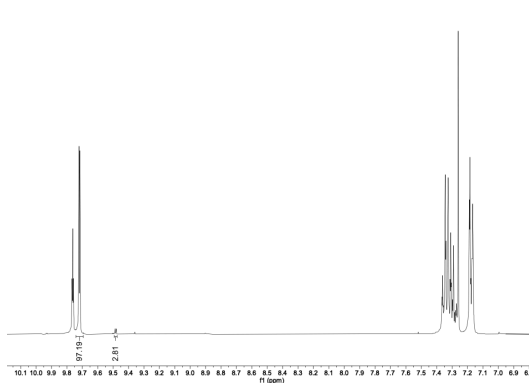

50 mol%:

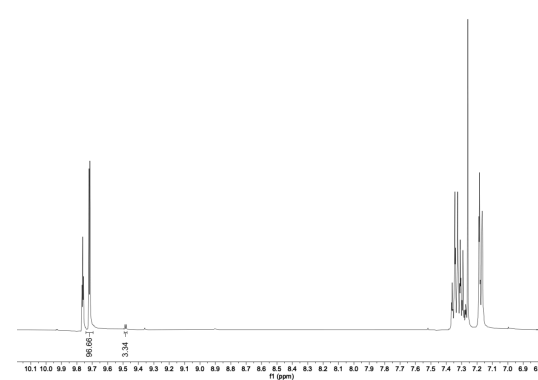

100 mol%:

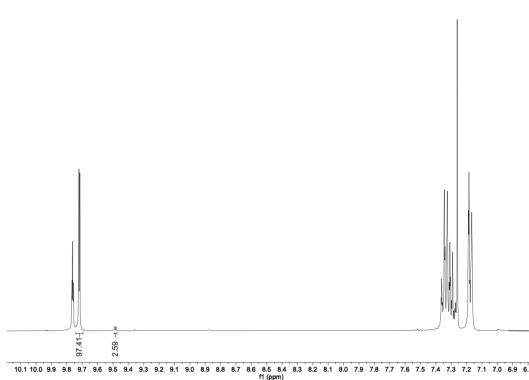

### Additive L (Ascorbic acid):

3 mol%:

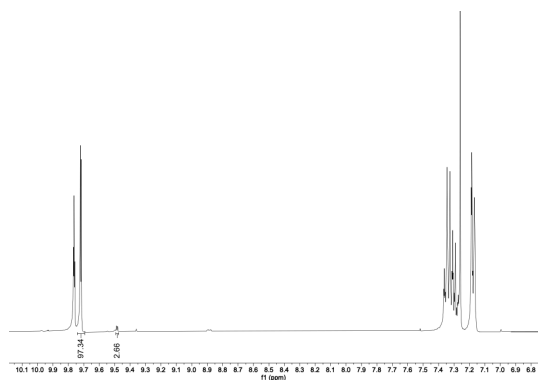

10 mol%:

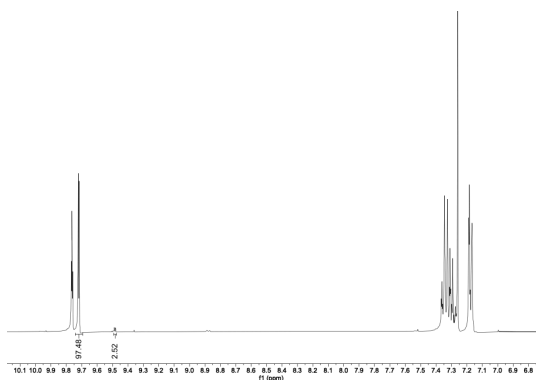

50 mol%:

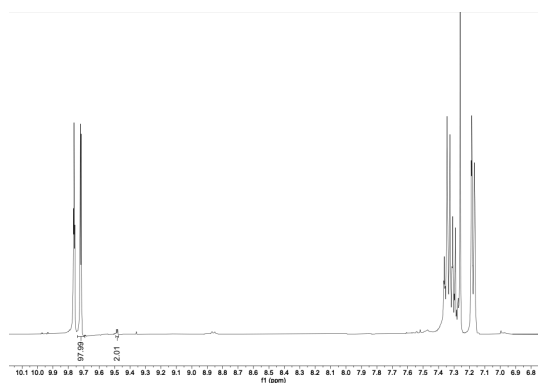

100 mol%:

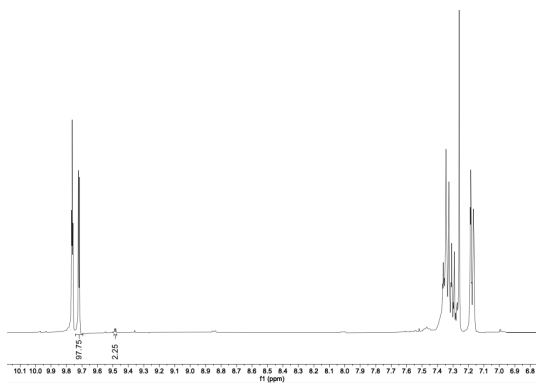

### Additive M (Vitamine B12):

3 mol%:

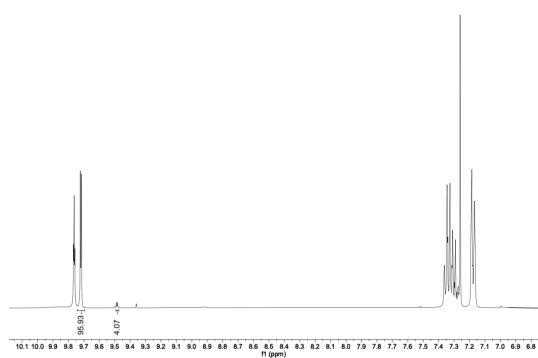

10 mol%:

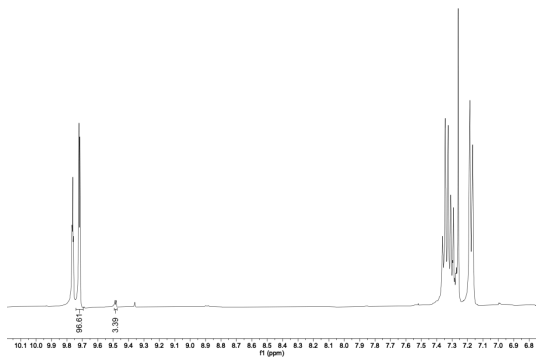

50 mol%:

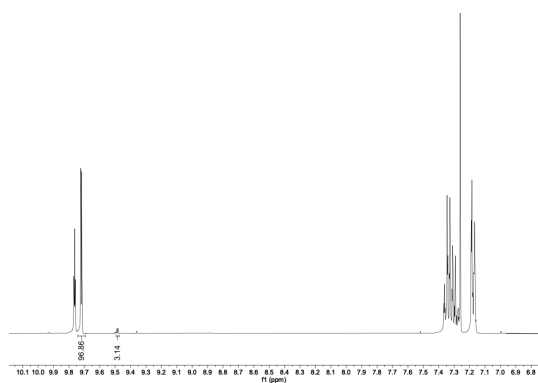

100 mol%:

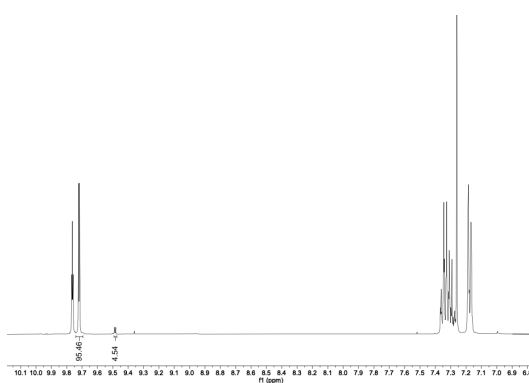

**Additive N (Citric Acid):**

3 mol%:

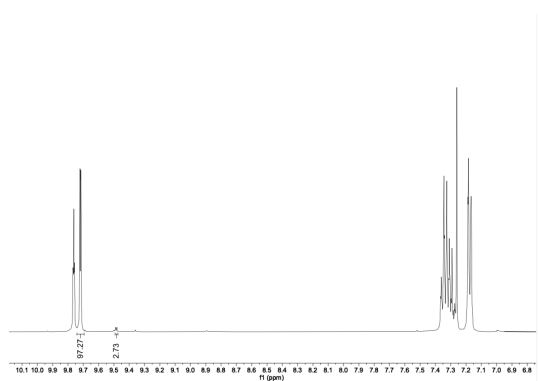

10 mol%:

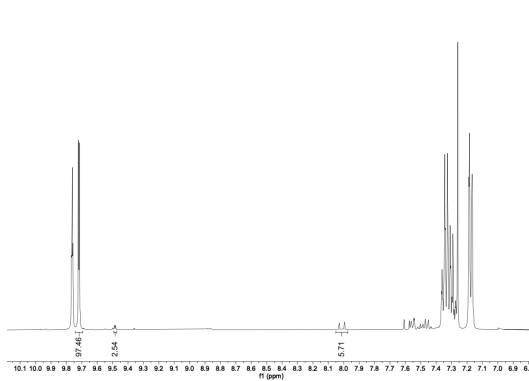

50 mol%:

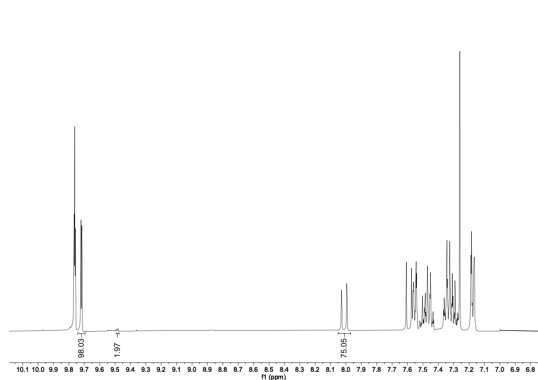

100 mol%:

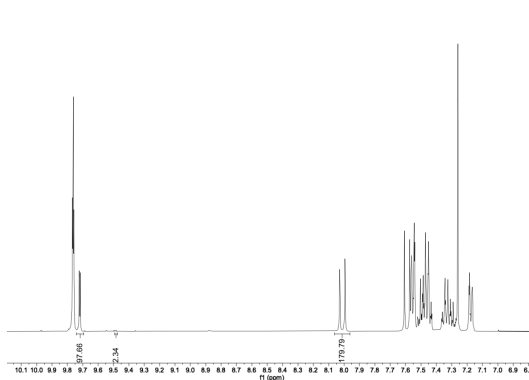

### Additive O (Pyruvic acid):

3 mol%:

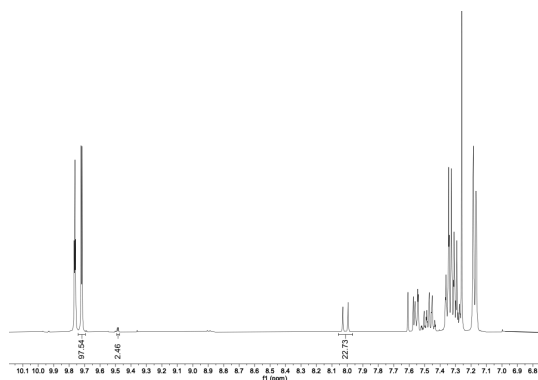

10 mol%:

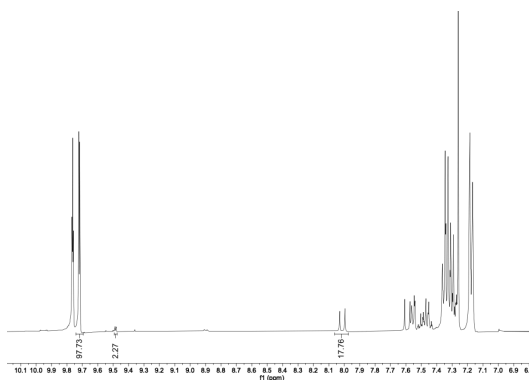

50 mol%:

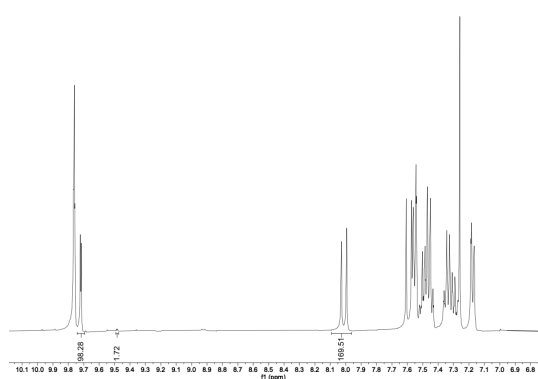

100 mol%:

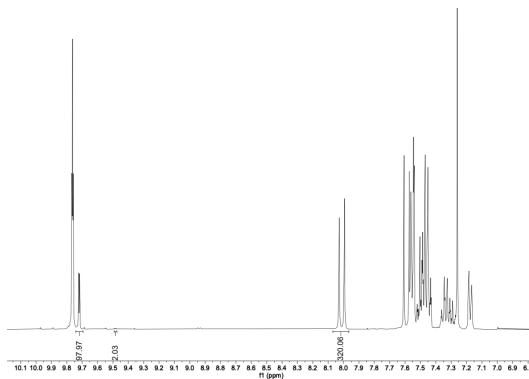

### Additive P (Glutathione):

3 mol%:

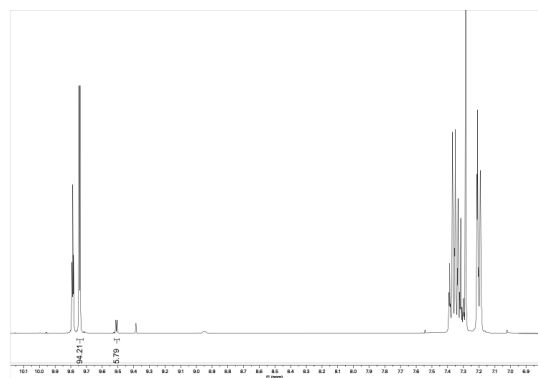

10 mol%:

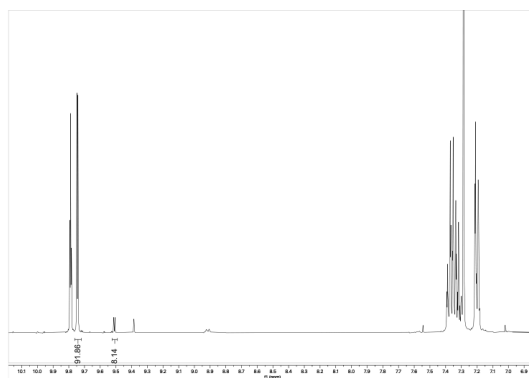

[illegible]

**Additive A (Glycine):**

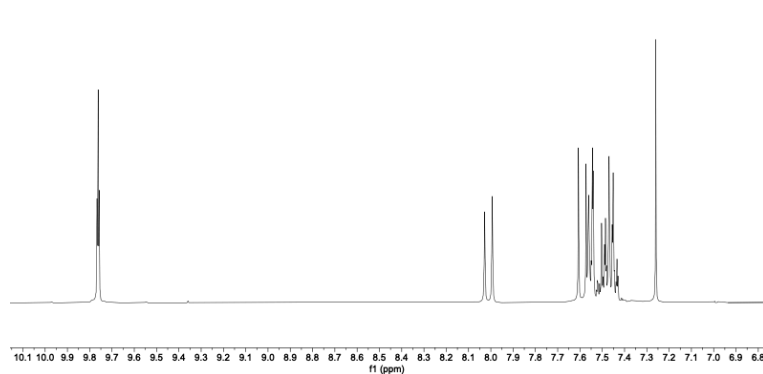

### Additive C (Glucose):

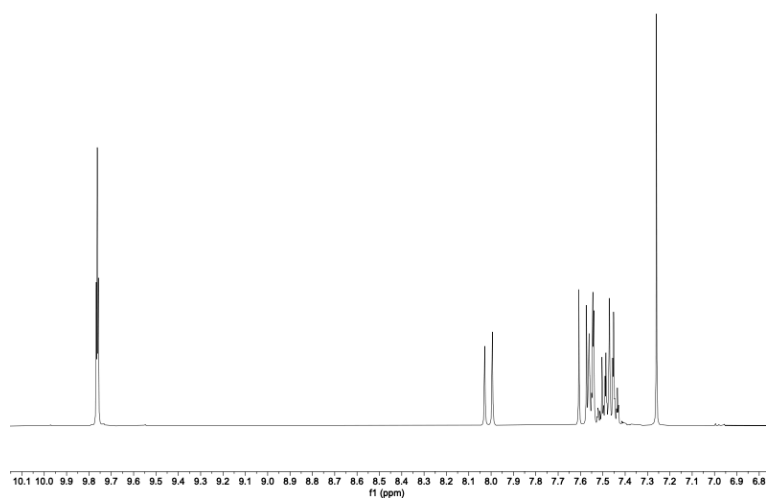

### Additive D (Fructose):

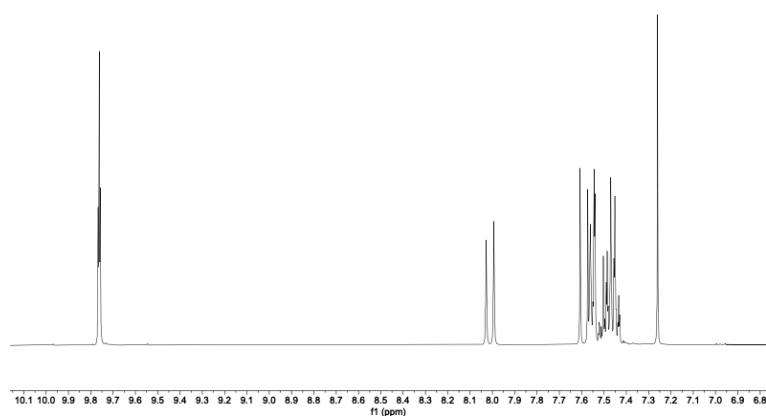

### Additive E (Lactose):

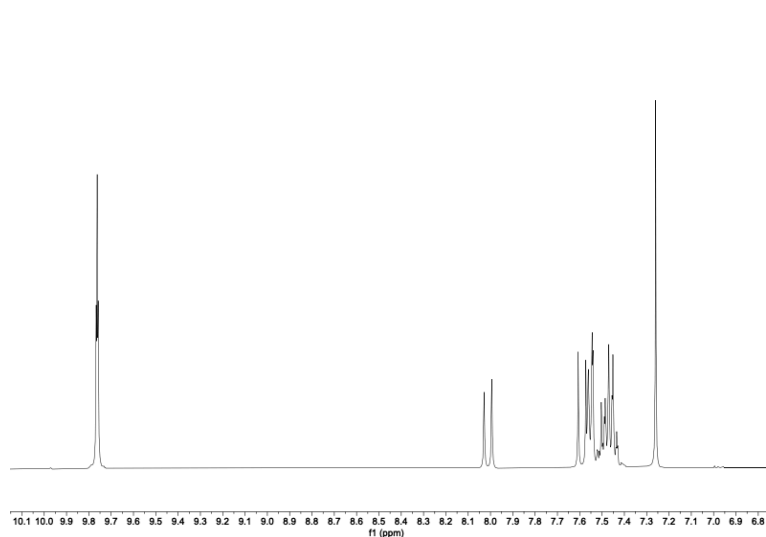

**Additive F (Adenine):**

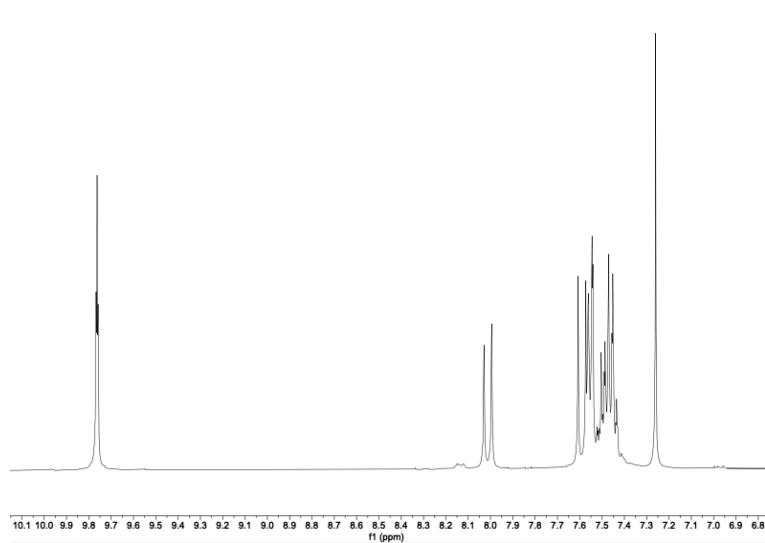

**Additive G (Guanosine):**

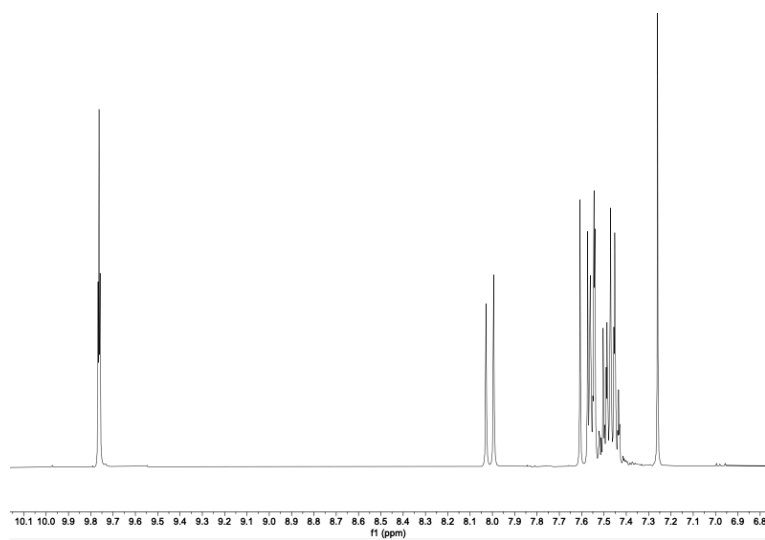

**Additive H (Thymidine-5'-monophosphoric acid):**

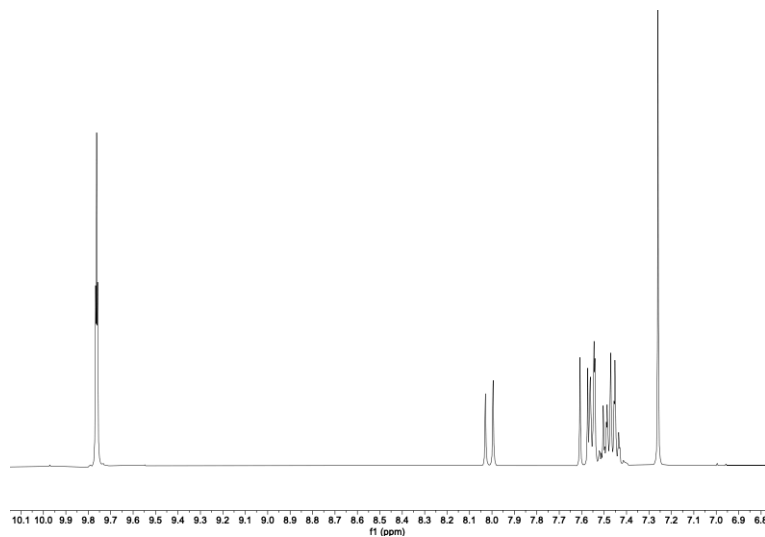



**Additive I (Tristearine):**

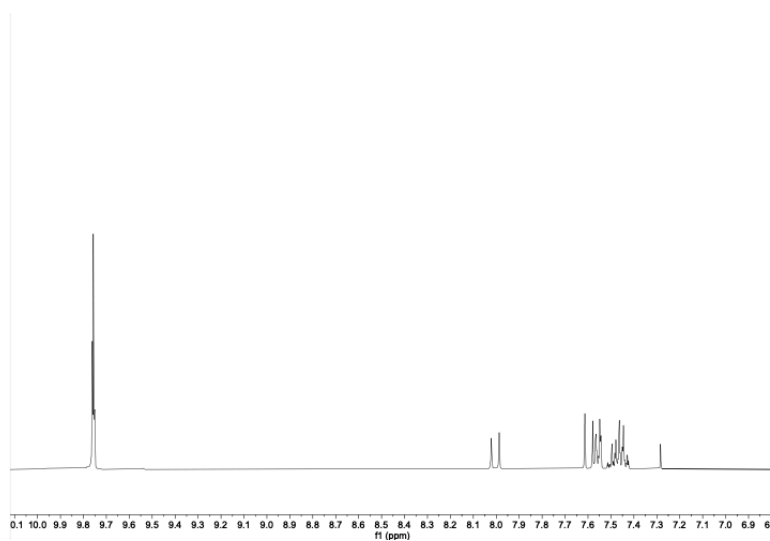

**Additive J (Squalene):**

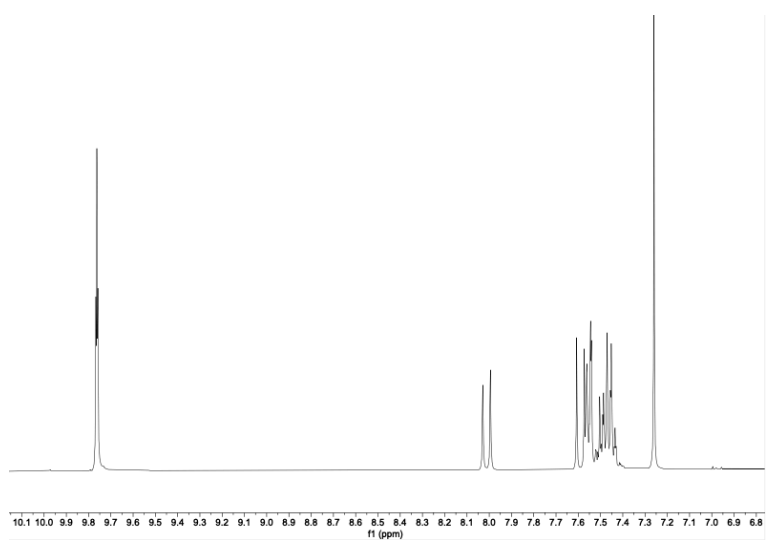

**Additive K (Cholesterol):**

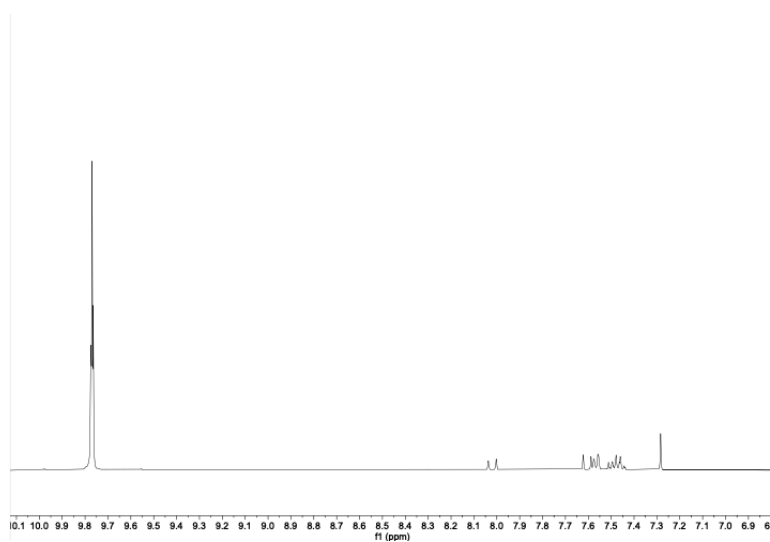

**Additive L (Ascorbic acid):**

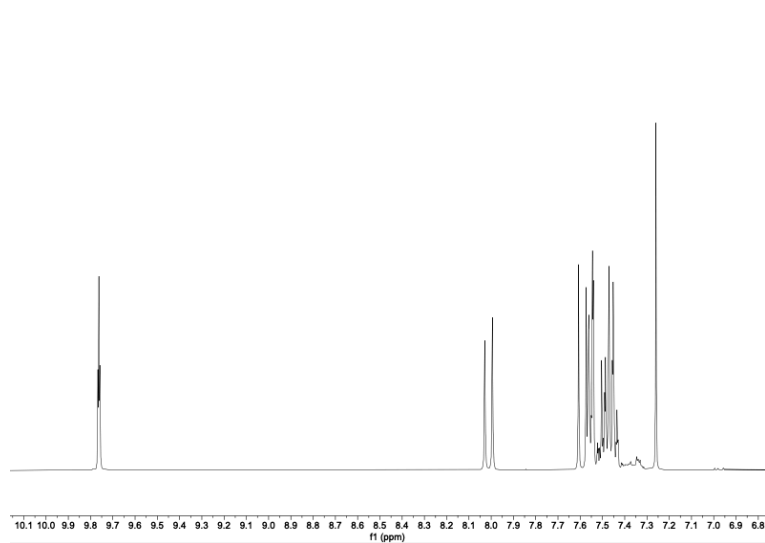

**Additive M (Vitamine B12):**

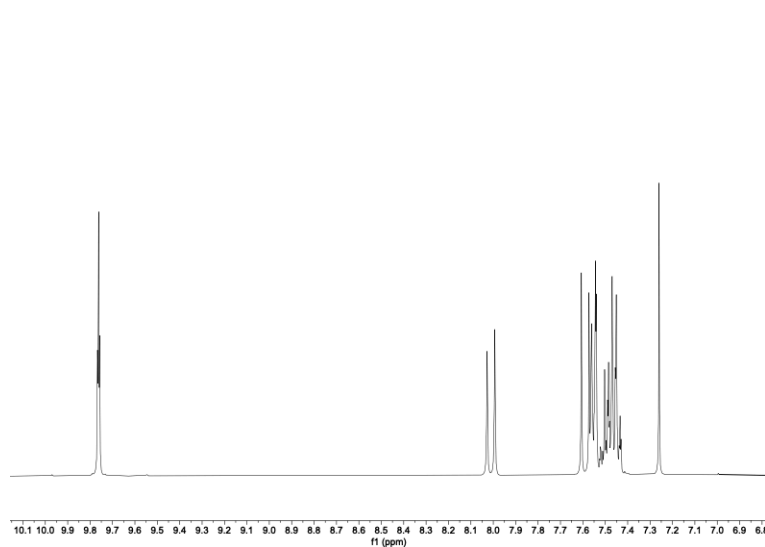

**Additive N (Citric Acid):**

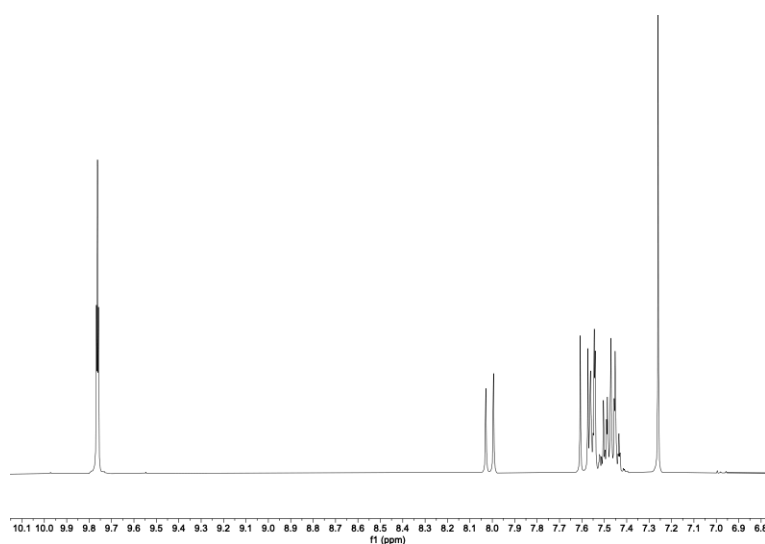

**Additive O (Pyruvic acid):**

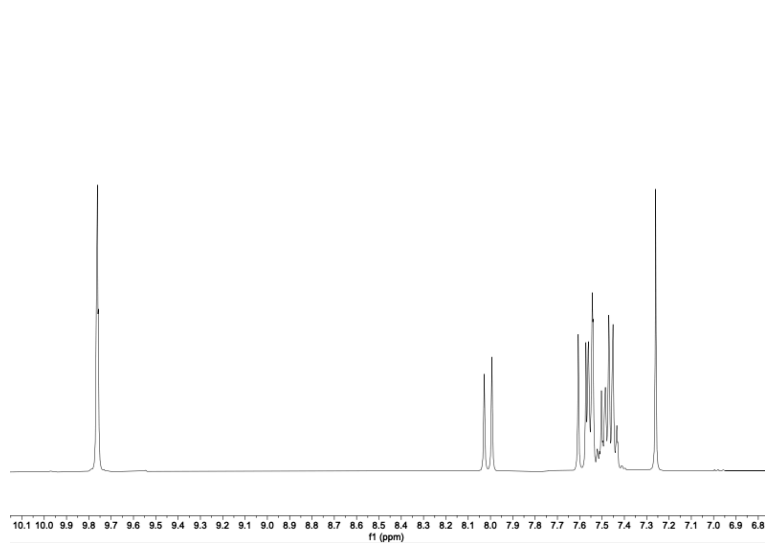

**Additive P (Glutathione):**

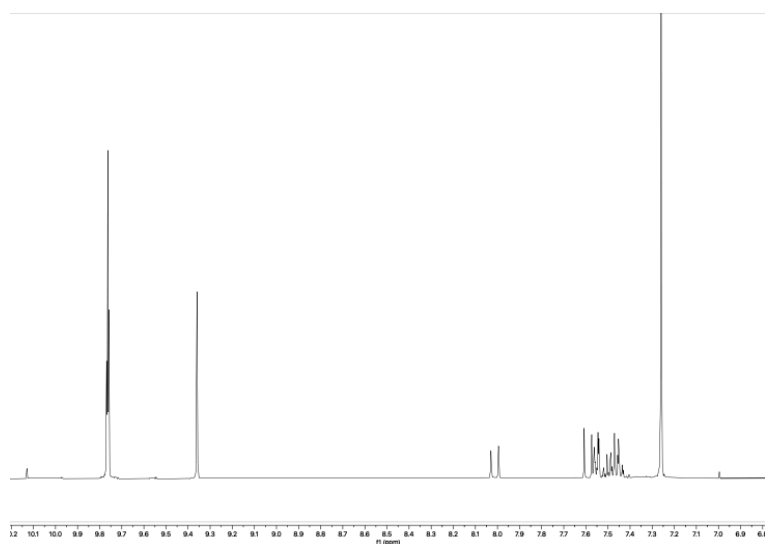

## SFC chromatograms:

### Racemate:

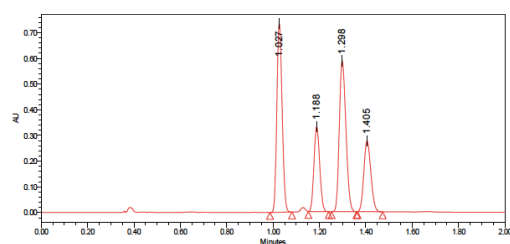

| Peak Name: |       |         |        |        |  |
|------------|-------|---------|--------|--------|--|
| Injection  | RT    | Area    | % Area | Height |  |
| 1          | 1.027 | 1161127 | 33.42  | 734743 |  |
| 2          | 1.405 | 578245  | 16.64  | 275084 |  |
| 3          | 1.298 | 1162526 | 33.46  | 587304 |  |
| 4          | 1.188 | 572390  | 16.48  | 330553 |  |
| Mean       | 1.229 |         |        |        |  |
| Std. Dev.  | 0.162 |         |        |        |  |
| % RSD      | 13.15 |         |        |        |  |

### Additive A (Glycine):

#### 3 mol%:

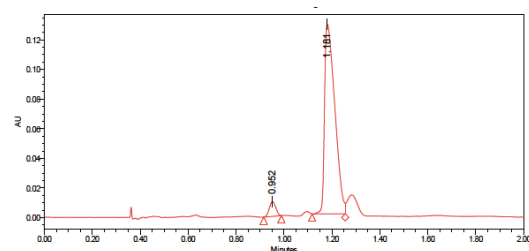

| Peak Name: |       |        |        |        |  |
|------------|-------|--------|--------|--------|--|
| Injection  | RT    | Area   | % Area | Height |  |
| 1          | 1.181 | 379485 | 95.32  | 128031 |  |
| 2          | 1.092 | 18614  | 4.68   | 9909   |  |
| Mean       | 1.067 |        |        |        |  |
| Std. Dev.  | 0.162 |        |        |        |  |
| % RSD      | 15.20 |        |        |        |  |

#### 10 mol%:

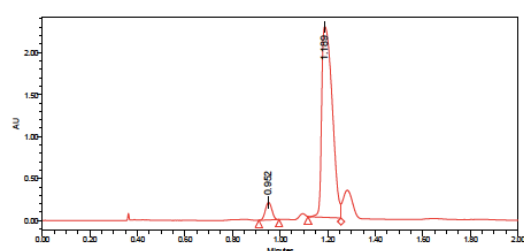

| Peak Name: |       |         |        |         |  |
|------------|-------|---------|--------|---------|--|
| Injection  | RT    | Area    | % Area | Height  |  |
| 1          | 1.189 | 7002699 | 94.61  | 2269307 |  |
| 2          | 1.092 | 398621  | 5.39   | 208969  |  |
| Mean       | 1.070 |         |        |         |  |
| Std. Dev.  | 0.167 |         |        |         |  |
| % RSD      | 15.65 |         |        |         |  |

#### 50 mol%:

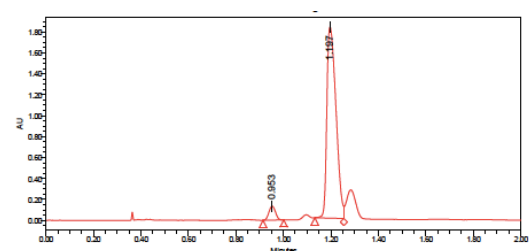

| Peak Name: |       |         |        |         |  |
|------------|-------|---------|--------|---------|--|
| Injection  | RT    | Area    | % Area | Height  |  |
| 1          | 1.197 | 4865208 | 95.04  | 1827103 |  |
| 2          | 1.093 | 254167  | 4.96   | 132843  |  |
| Mean       | 1.075 |         |        |         |  |
| Std. Dev.  | 0.173 |         |        |         |  |
| % RSD      | 16.05 |         |        |         |  |

#### 100 mol%:

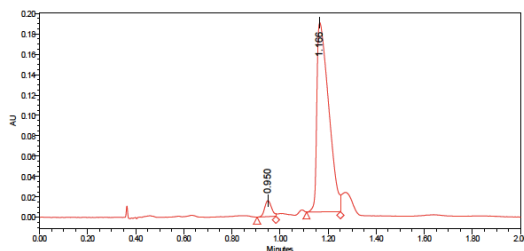

| Peak Name: |       |        |        |        |  |
|------------|-------|--------|--------|--------|--|
| Injection  | RT    | Area   | % Area | Height |  |
| 1          | 1.196 | 632808 | 95.36  | 185628 |  |
| 2          | 1.090 | 30804  | 4.64   | 15586  |  |
| Mean       | 1.058 |        |        |        |  |
| Std. Dev.  | 0.153 |        |        |        |  |
| % RSD      | 14.43 |        |        |        |  |

## Additive B (Phenylalanine):

3 mol%:

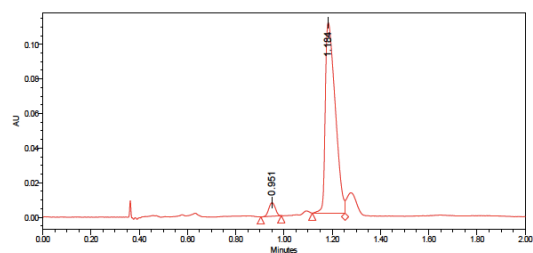

| Peak Name: |           |       |        |        |
|------------|-----------|-------|--------|--------|
|            | Injection | RT    | Area   | % Area |
| 1          | 1         | 1.184 | 315585 | 95.57  |
| 2          | 1         | 0.951 | 14615  | 4.43   |
| Mean       |           | 1.067 |        |        |
| Std. Dev.  |           | 0.165 |        |        |
| % RSD      |           | 15.43 |        |        |

10 mol%:

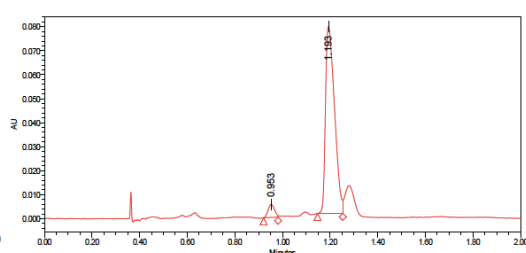

| Peak Name: |           |       |        |        |
|------------|-----------|-------|--------|--------|
|            | Injection | RT    | Area   | % Area |
| 1          | 1         | 1.193 | 204101 | 95.24  |
| 2          | 1         | 0.953 | 10194  | 4.76   |
| Mean       |           | 1.073 |        |        |
| Std. Dev.  |           | 0.170 |        |        |
| % RSD      |           | 15.81 |        |        |

50 mol%:

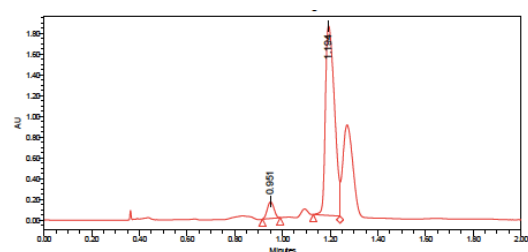

| Peak Name: |           |       |         |        |
|------------|-----------|-------|---------|--------|
|            | Injection | RT    | Area    | % Area |
| 1          | 1         | 1.194 | 4845038 | 93.04  |
| 2          | 1         | 0.951 | 312786  | 6.06   |
| Mean       |           | 1.072 |         |        |
| Std. Dev.  |           | 0.172 |         |        |
| % RSD      |           | 16.05 |         |        |

100 mol%:

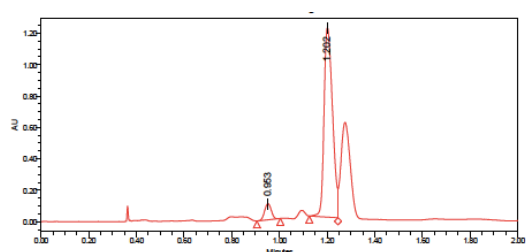

| Peak Name: |           |       |         |        |
|------------|-----------|-------|---------|--------|
|            | Injection | RT    | Area    | % Area |
| 1          | 1         | 1.202 | 2966630 | 93.75  |
| 2          | 1         | 0.953 | 197924  | 6.25   |
| Mean       |           | 1.077 |         |        |
| Std. Dev.  |           | 0.176 |         |        |
| % RSD      |           | 16.35 |         |        |

## Additive C (Glucose):

3 mol%:

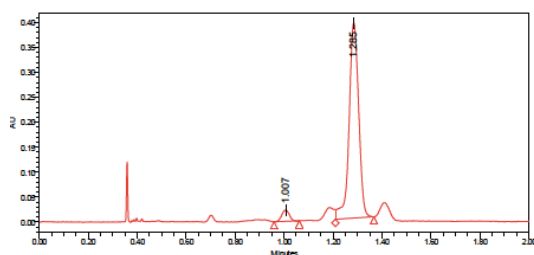

| Processed Channel: PDA Ch2<br>214nm@1.2nm |                     |                      |         |        |
|-------------------------------------------|---------------------|----------------------|---------|--------|
|                                           | Processed Channel   | Retention Time (min) | Area    | % Area |
| 1                                         | PDA.Ch2 214nm@1.2nm | 1.007                | 48327   | 4.34   |
| 2                                         | PDA.Ch2 214nm@1.2nm | 1.295                | 1066391 | 95.66  |

10 mol%:

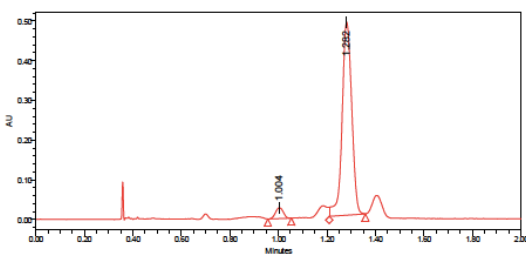

| Processed Channel: PDA Ch2<br>214nm@1.2nm |                     |                      |         |        |
|-------------------------------------------|---------------------|----------------------|---------|--------|
|                                           | Processed Channel   | Retention Time (min) | Area    | % Area |
| 1                                         | PDA.Ch2 214nm@1.2nm | 1.004                | 60469   | 4.30   |
| 2                                         | PDA.Ch2 214nm@1.2nm | 1.292                | 1344439 | 95.70  |

50 mol%:

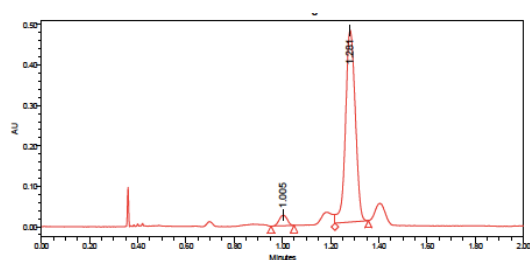

Processed Channel: PDA Ch2  
214nm@1.2nm

| Processed Channel     | Retention Time (min) | Area    | % Area | Height |
|-----------------------|----------------------|---------|--------|--------|
| 1 PDA Ch2 214nm@1.2nm | 1.005                | 60734   | 4.36   | 25936  |
| 2 PDA Ch2 214nm@1.2nm | 1.281                | 1331105 | 95.64  | 474201 |

100 mol%:

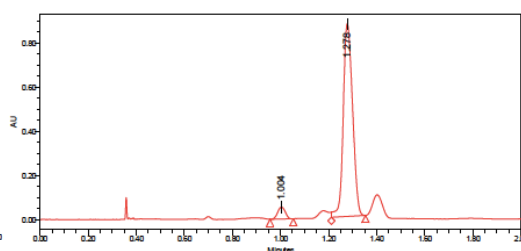

Processed Channel: PDA Ch2  
214nm@1.2nm

| Processed Channel     | Retention Time (min) | Area    | % Area | Height |
|-----------------------|----------------------|---------|--------|--------|
| 1 PDA Ch2 214nm@1.2nm | 1.004                | 117395  | 4.76   | 53701  |
| 2 PDA Ch2 214nm@1.2nm | 1.278                | 2349658 | 95.24  | 871500 |

Additive D (Fructose):

3 mol%:

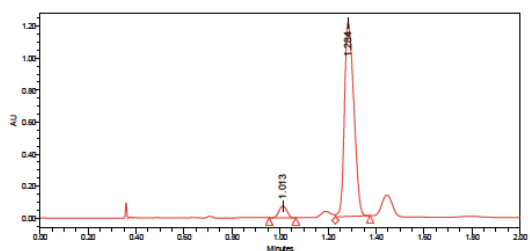

Processed Channel: PDA Ch2  
214nm@1.2nm

| Processed Channel     | Retention Time (min) | Area    | % Area | Height  |
|-----------------------|----------------------|---------|--------|---------|
| 1 PDA Ch2 214nm@1.2nm | 1.013                | 167770  | 4.83   | 73446   |
| 2 PDA Ch2 214nm@1.2nm | 1.284                | 3302558 | 95.17  | 1209592 |

10 mol%:

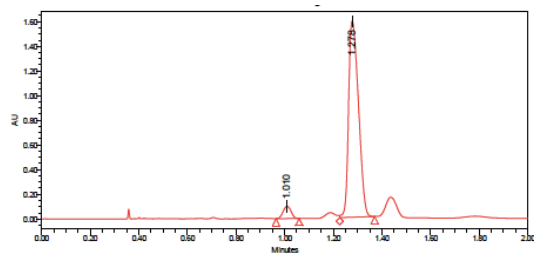

Processed Channel: PDA Ch2  
214nm@1.2nm

| Processed Channel     | Retention Time (min) | Area    | % Area | Height  |
|-----------------------|----------------------|---------|--------|---------|
| 1 PDA Ch2 214nm@1.2nm | 1.010                | 227760  | 4.83   | 102419  |
| 2 PDA Ch2 214nm@1.2nm | 1.278                | 4485263 | 95.17  | 1589897 |

50 mol%:

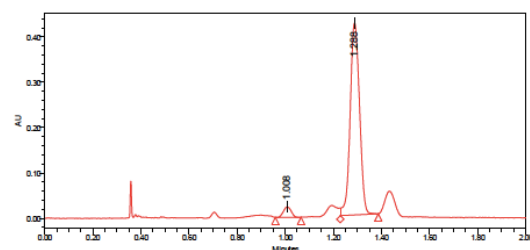

Processed Channel: PDA Ch2  
214nm@1.2nm

| Processed Channel     | Retention Time (min) | Area    | % Area | Height |
|-----------------------|----------------------|---------|--------|--------|
| 1 PDA Ch2 214nm@1.2nm | 1.008                | 51425   | 4.30   | 32867  |
| 2 PDA Ch2 214nm@1.2nm | 1.285                | 1143656 | 95.70  | 422992 |

100 mol%:

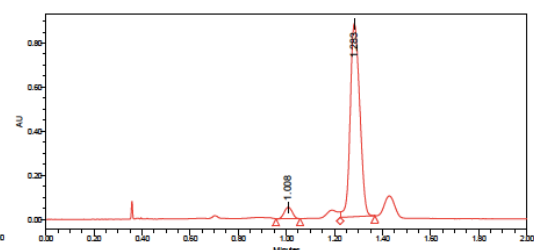

Processed Channel: PDA Ch2  
214nm@1.2nm

| Processed Channel     | Retention Time (min) | Area    | % Area | Height |
|-----------------------|----------------------|---------|--------|--------|
| 1 PDA Ch2 214nm@1.2nm | 1.008                | 118427  | 4.67   | 51707  |
| 2 PDA Ch2 214nm@1.2nm | 1.283                | 2416627 | 95.33  | 876765 |

## Additive E (Lactose):

3 mol%:

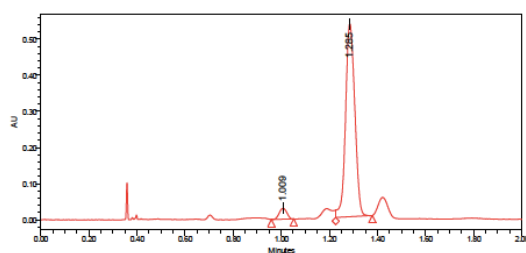

Processed Channel: PDA Ch2  
214nm@1.2nm

| Processed Channel     | Retention Time (min) | Area   | % Area | Height |
|-----------------------|----------------------|--------|--------|--------|
| 1 PDA Ch2 214nm@1.2nm | 1.009                | 65757  | 4.41   | 30038  |
| 2 PDA Ch2 214nm@1.2nm | 1.265                | 142493 | 95.59  | 53398  |

10 mol%:

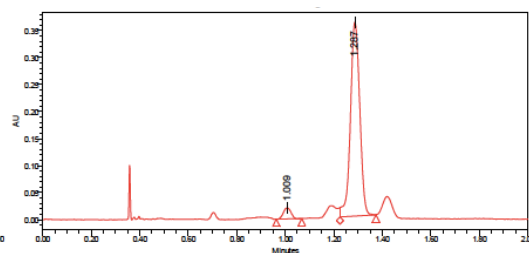

Processed Channel: PDA Ch2  
214nm@1.2nm

| Processed Channel     | Retention Time (min) | Area   | % Area | Height |
|-----------------------|----------------------|--------|--------|--------|
| 1 PDA Ch2 214nm@1.2nm | 1.009                | 44625  | 4.44   | 20409  |
| 2 PDA Ch2 214nm@1.2nm | 1.267                | 959046 | 95.55  | 358641 |

50 mol%:

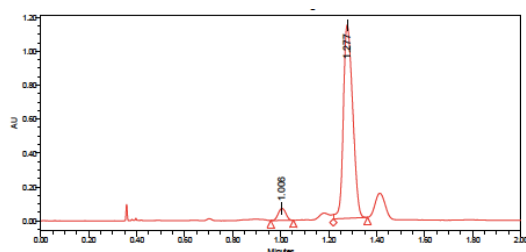

Processed Channel: PDA Ch2  
214nm@1.2nm

| Processed Channel     | Retention Time (min) | Area    | % Area | Height |
|-----------------------|----------------------|---------|--------|--------|
| 1 PDA Ch2 214nm@1.2nm | 1.006                | 154755  | 4.77   | 70578  |
| 2 PDA Ch2 214nm@1.2nm | 1.271                | 3088109 | 95.23  | 113935 |

100 mol%:

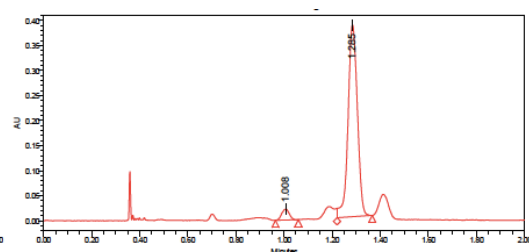

Processed Channel: PDA Ch2  
214nm@1.2nm

| Processed Channel     | Retention Time (min) | Area    | % Area | Height |
|-----------------------|----------------------|---------|--------|--------|
| 1 PDA Ch2 214nm@1.2nm | 1.008                | 46996   | 4.36   | 21419  |
| 2 PDA Ch2 214nm@1.2nm | 1.265                | 1030216 | 95.64  | 382467 |

## Additive F (Adenine):

3 mol%:

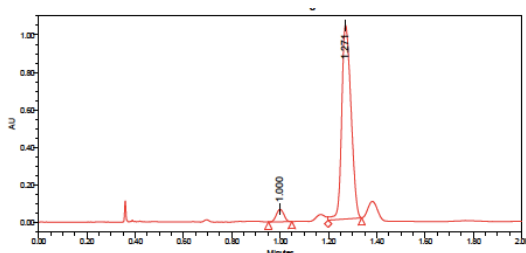

Processed Channel: PDA Ch2  
214nm@1.2nm

| Processed Channel     | Retention Time (min) | Area    | % Area | Height  |
|-----------------------|----------------------|---------|--------|---------|
| 1 PDA Ch2 214nm@1.2nm | 1.000                | 143994  | 4.94   | 86514   |
| 2 PDA Ch2 214nm@1.2nm | 1.271                | 2769006 | 95.06  | 1033932 |

10 mol%:

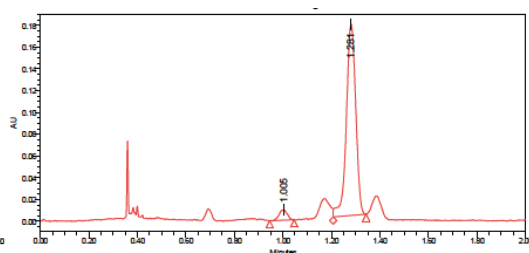

Processed Channel: PDA Ch2  
214nm@1.2nm

| Processed Channel     | Retention Time (min) | Area   | % Area | Height |
|-----------------------|----------------------|--------|--------|--------|
| 1 PDA Ch2 214nm@1.2nm | 1.005                | 22378  | 4.52   | 9405   |
| 2 PDA Ch2 214nm@1.2nm | 1.281                | 472210 | 95.48  | 175951 |

50 mol%:

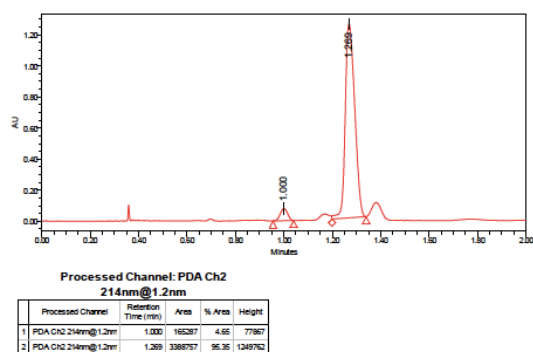

100 mol%:

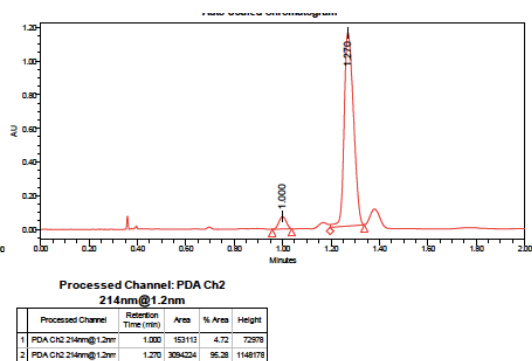

Additive G (Guanosine):

3 mol%:

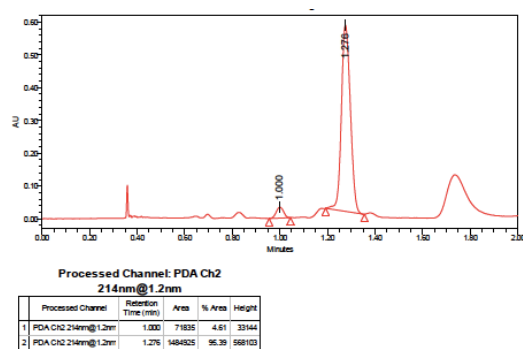

10 mol%:

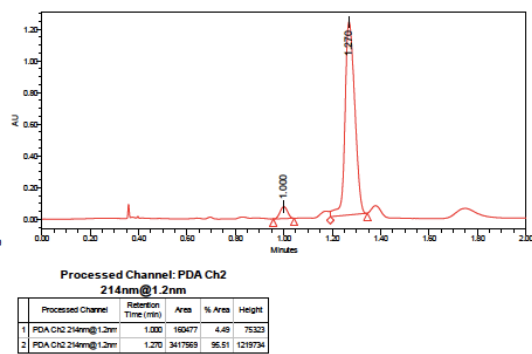

50 mol%:

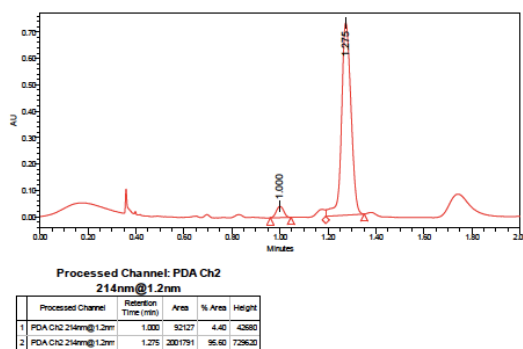

100 mol%:

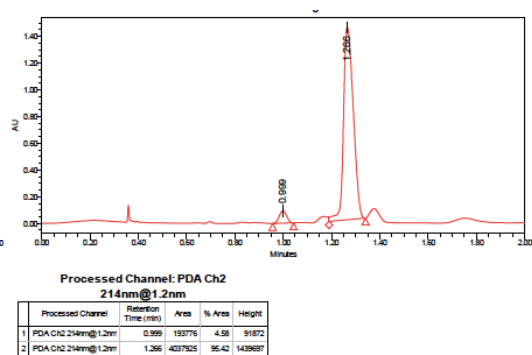



## Additive H (Thymidine-5'-monophosphoric acid):

3 mol%:

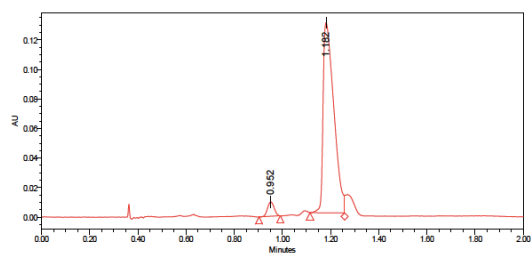

| Peak Name: |           |       |        |        |        |
|------------|-----------|-------|--------|--------|--------|
|            | Injection | RT    | Area   | % Area | Height |
| 1          | 1         | 1.182 | 396760 | 95.57  | 128709 |
| 2          | 1         | 0.952 | 18405  | 4.43   | 9720   |
| Mean       |           | 1.067 |        |        |        |
| Std. Dev.  |           | 0.162 |        |        |        |
| % RSD      |           | 15.21 |        |        |        |

10 mol%:

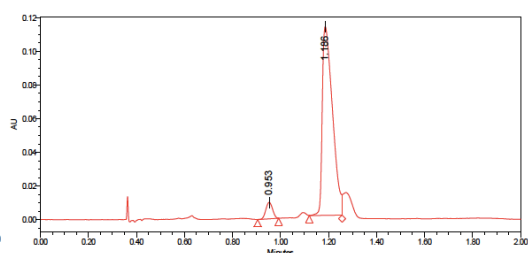

| Peak Name: |           |       |        |        |        |
|------------|-----------|-------|--------|--------|--------|
|            | Injection | RT    | Area   | % Area | Height |
| 1          | 1         | 1.186 | 330145 | 94.55  | 112047 |
| 2          | 1         | 0.953 | 19046  | 5.45   | 9804   |
| Mean       |           | 1.070 |        |        |        |
| Std. Dev.  |           | 0.165 |        |        |        |
| % RSD      |           | 15.43 |        |        |        |

50 mol%:

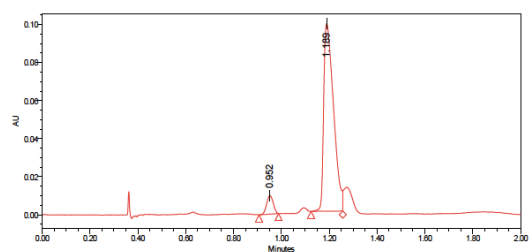

| Peak Name: |           |       |        |        |        |
|------------|-----------|-------|--------|--------|--------|
|            | Injection | RT    | Area   | % Area | Height |
| 1          | 1         | 1.189 | 280949 | 93.78  | 98629  |
| 2          | 1         | 0.952 | 18627  | 6.22   | 9863   |
| Mean       |           | 1.071 |        |        |        |
| Std. Dev.  |           | 0.168 |        |        |        |
| % RSD      |           | 15.67 |        |        |        |

100 mol%:

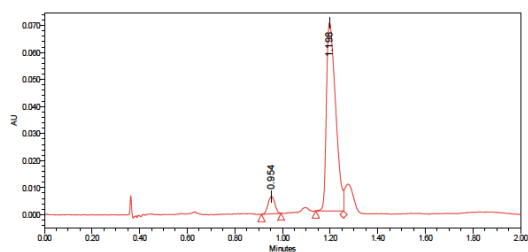

| Peak Name: |           |       |        |        |        |
|------------|-----------|-------|--------|--------|--------|
|            | Injection | RT    | Area   | % Area | Height |
| 1          | 1         | 1.198 | 186237 | 93.63  | 69616  |
| 2          | 1         | 0.954 | 12670  | 6.37   | 6381   |
| Mean       |           | 1.076 |        |        |        |
| Std. Dev.  |           | 0.172 |        |        |        |
| % RSD      |           | 16.02 |        |        |        |

## Additive I (Tristearine):

3 mol%:

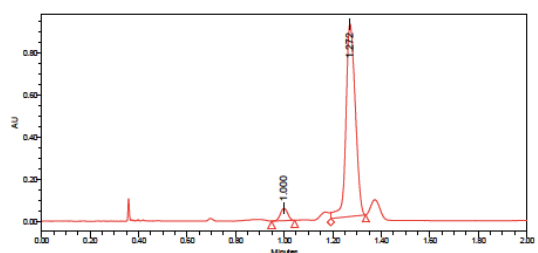

| Processed Channel: PDA Ch2<br>214nm@1.2nm |                     |                      |         |        |        |
|-------------------------------------------|---------------------|----------------------|---------|--------|--------|
|                                           | Processed Channel   | Retention Time (min) | Area    | % Area | Height |
| 1                                         | PDA Ch2 214nm@1.2nm | 1.000                | 121585  | 4.71   | 59089  |
| 2                                         | PDA Ch2 214nm@1.2nm | 1.272                | 2462472 | 95.29  | 914843 |

10 mol%:

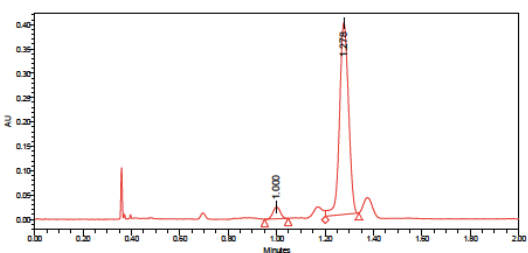

| Processed Channel: PDA Ch2<br>214nm@1.2nm |                     |                      |         |        |        |
|-------------------------------------------|---------------------|----------------------|---------|--------|--------|
|                                           | Processed Channel   | Retention Time (min) | Area    | % Area | Height |
| 1                                         | PDA Ch2 214nm@1.2nm | 1.000                | 51515   | 4.52   | 24132  |
| 2                                         | PDA Ch2 214nm@1.2nm | 1.278                | 1017362 | 95.48  | 393607 |

50 mol%:

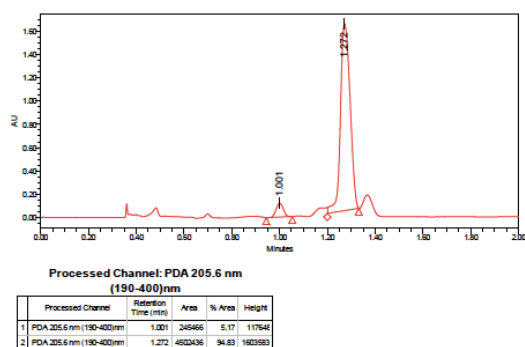

100 mol%:

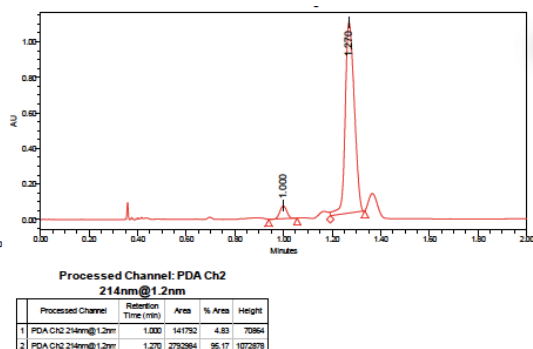

Additive J (Squalene):

3 mol%:

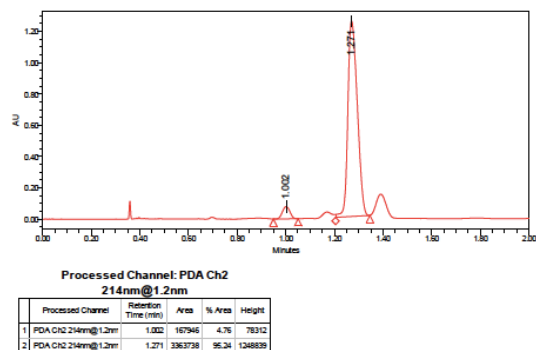

10 mol%:

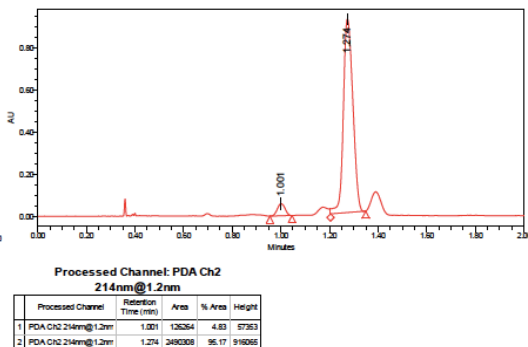

50 mol%:

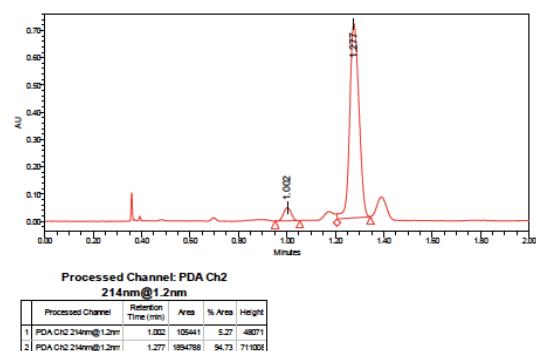

100 mol%:

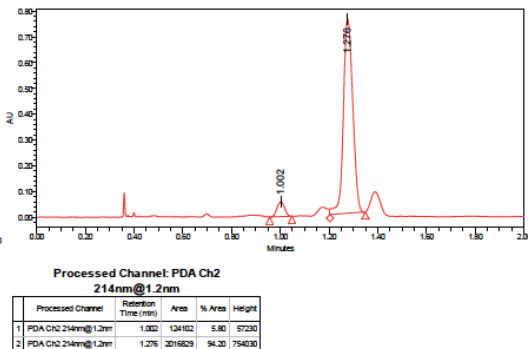

## Additive K (Cholesterol):

3 mol%:

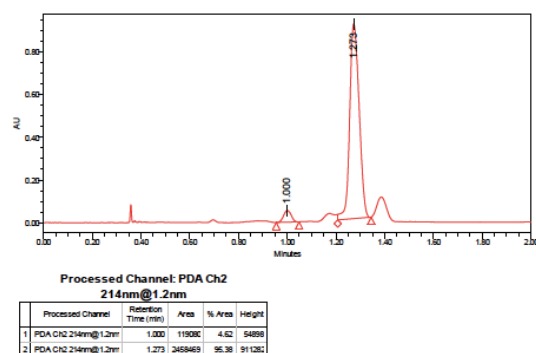

10 mol%:

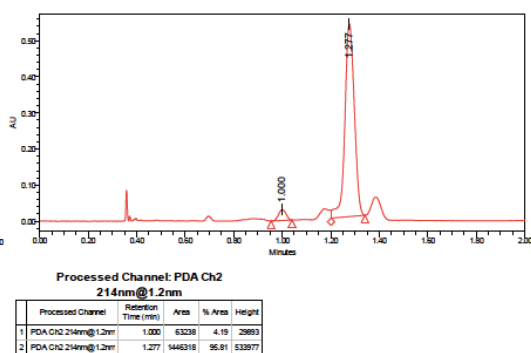

50 mol%:

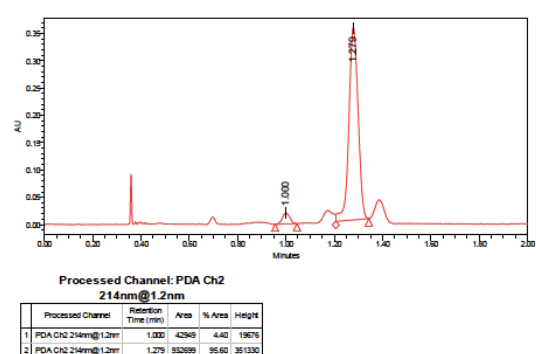

100 mol%:

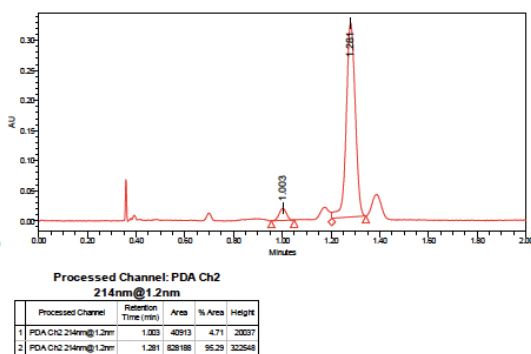

## Additive L (Ascorbic acid):

3 mol%:

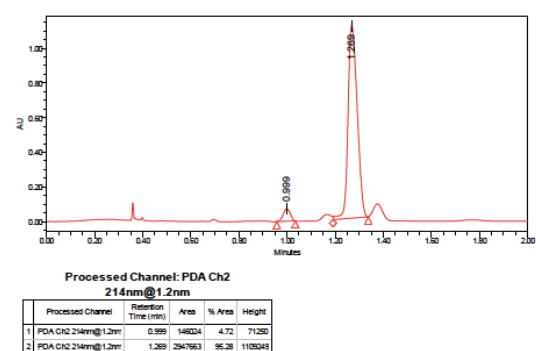

10 mol%:

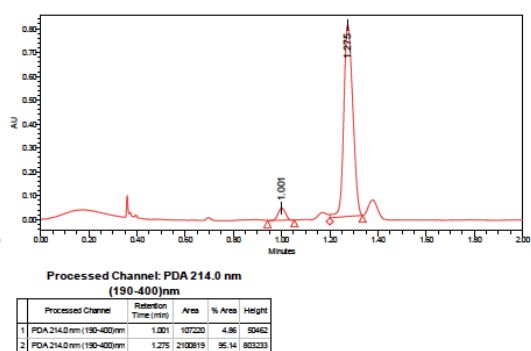

50 mol%:

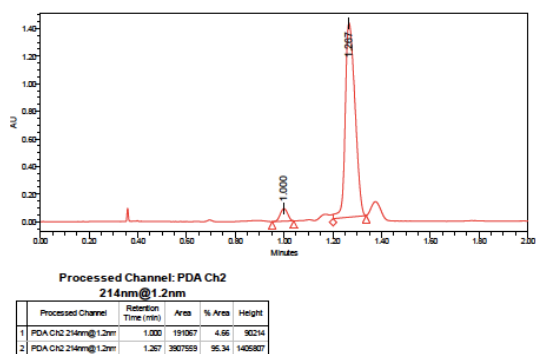

100 mol%:

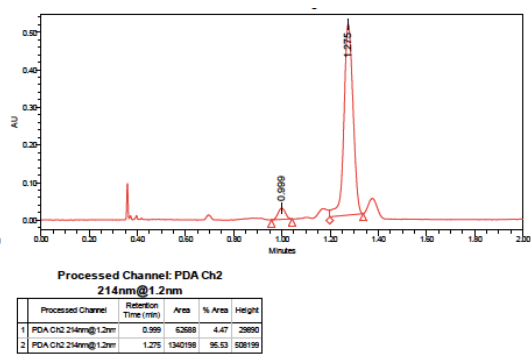

Additive M (Vitamine B<sub>12</sub>):

3 mol%:

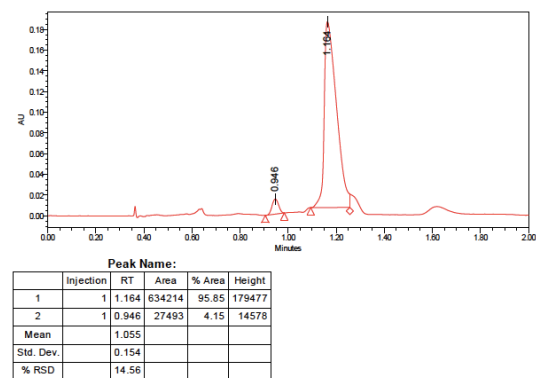

10 mol%:

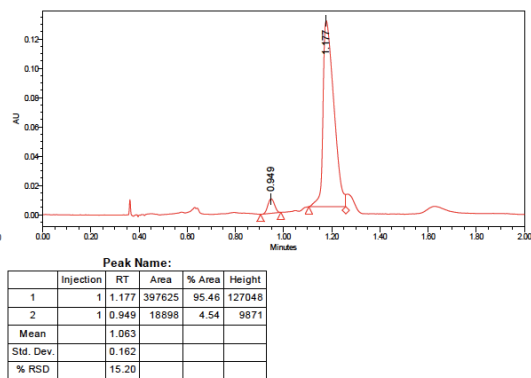

50 mol%:

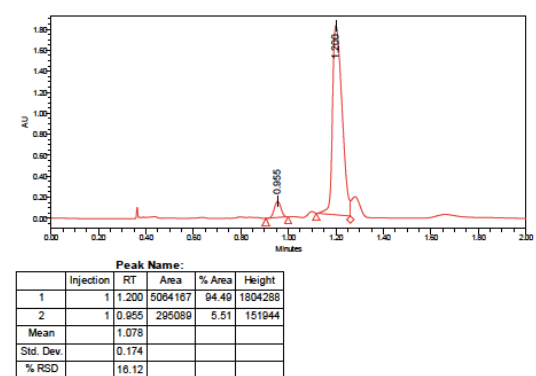

100 mol%:

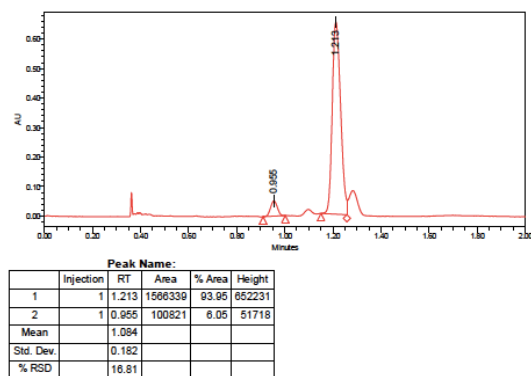

## Additive N (Citric Acid):

3 mol%:

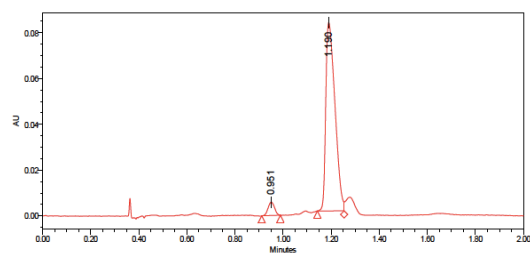

| Peak Name: |       |        |        |        |
|------------|-------|--------|--------|--------|
| Injection  | RT    | Area   | % Area | Height |
| 1          | 1.190 | 217647 | 95.24  | 62259  |
| 2          | 0.951 | 10878  | 4.76   | 5876   |
| Mean       | 1.071 |        |        |        |
| Std. Dev.  | 0.169 |        |        |        |
| % RSD      | 15.80 |        |        |        |

10 mol%:

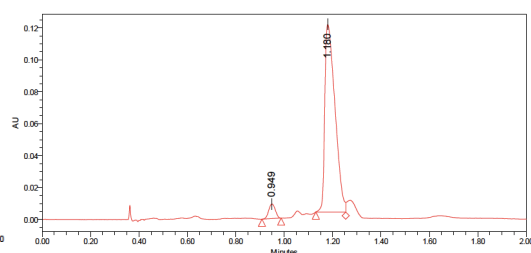

| Peak Name: |       |        |        |        |
|------------|-------|--------|--------|--------|
| Injection  | RT    | Area   | % Area | Height |
| 1          | 1.180 | 342601 | 95.24  | 117486 |
| 2          | 0.949 | 17137  | 4.76   | 9132   |
| Mean       | 1.065 |        |        |        |
| Std. Dev.  | 0.163 |        |        |        |
| % RSD      | 15.32 |        |        |        |

50 mol%:

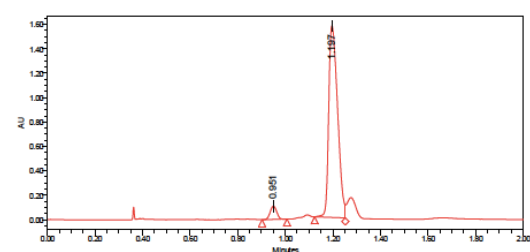

| Peak Name: |       |         |        |         |
|------------|-------|---------|--------|---------|
| Injection  | RT    | Area    | % Area | Height  |
| 1          | 1.197 | 4073488 | 95.14  | 1571183 |
| 2          | 0.951 | 206127  | 4.86   | 107751  |
| Mean       | 1.074 |         |        |         |
| Std. Dev.  | 0.174 |         |        |         |
| % RSD      | 16.20 |         |        |         |

100 mol%:

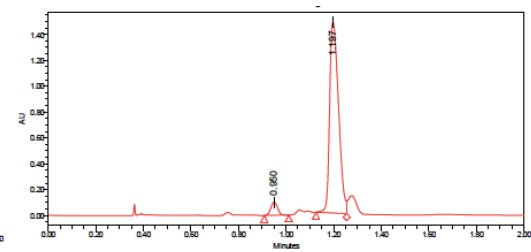

| Peak Name: |       |         |        |         |
|------------|-------|---------|--------|---------|
| Injection  | RT    | Area    | % Area | Height  |
| 1          | 1.197 | 3837368 | 95.13  | 1478489 |
| 2          | 0.950 | 196554  | 4.87   | 100340  |
| Mean       | 1.074 |         |        |         |
| Std. Dev.  | 0.175 |         |        |         |
| % RSD      | 16.29 |         |        |         |

## Additive O (Pyruvic acid):

3 mol%:

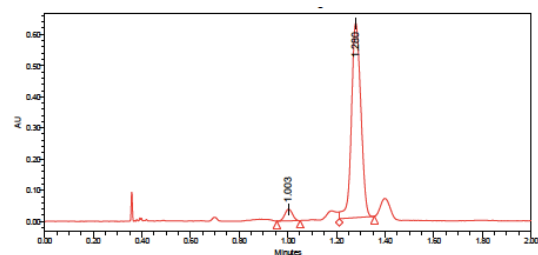

| Processed Channel: PDA Ch2<br>214nm@1.2nm |                      |         |        |        |
|-------------------------------------------|----------------------|---------|--------|--------|
| Processed Channel                         | Retention Time (min) | Area    | % Area | Height |
| 1 PDA Ch2 214nm@1.2nm                     | 1.003                | 81830   | 4.65   | 37041  |
| 2 PDA Ch2 214nm@1.2nm                     | 1.250                | 1679716 | 95.35  | 623672 |

10 mol%:

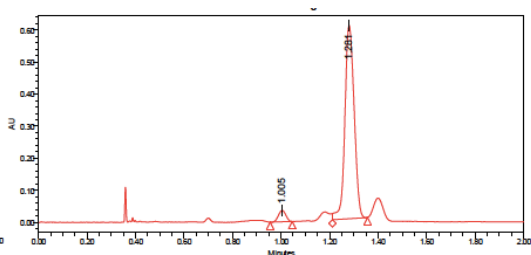

| Processed Channel: PDA Ch2<br>214nm@1.2nm |                      |         |        |        |
|-------------------------------------------|----------------------|---------|--------|--------|
| Processed Channel                         | Retention Time (min) | Area    | % Area | Height |
| 1 PDA Ch2 214nm@1.2nm                     | 1.005                | 74655   | 4.46   | 34880  |
| 2 PDA Ch2 214nm@1.2nm                     | 1.251                | 1602552 | 95.55  | 602861 |

50 mol%:

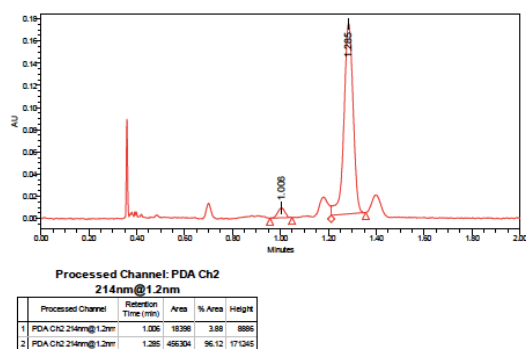

100 mol%:

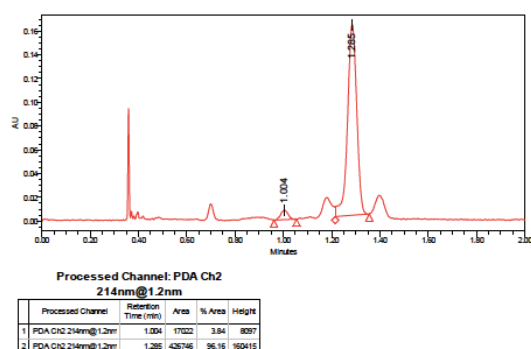

Additive P (Glutathione):

3 mol%:

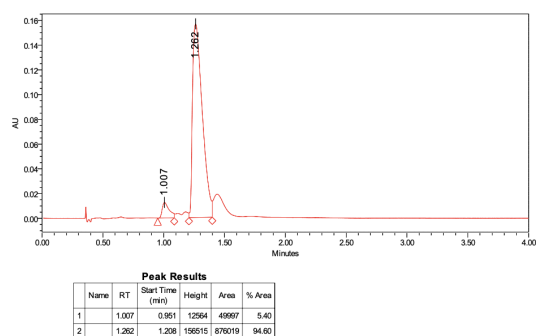

10 mol%:

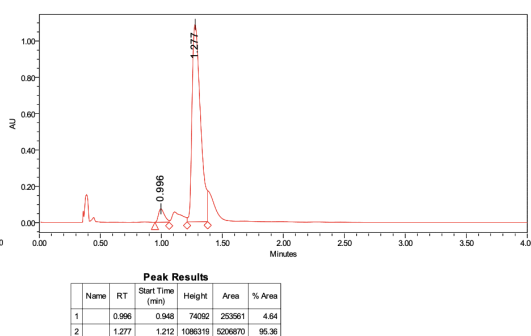

50 mol%:

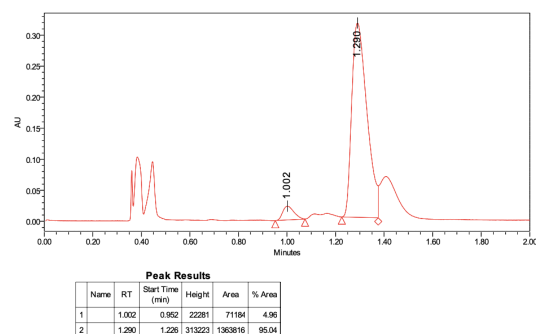

100 mol%:

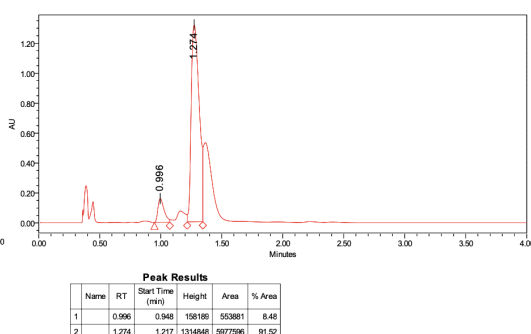

## 7. Conjugate Addition Reaction in Complex Mixtures

| Solvent    | Conversion <sup>a</sup><br>(%) |     | Major<br>diastereomer <sup>a</sup><br>(%) |    | <i>ee</i> <sup>b</sup><br>(%) |    | Solvent    | Conversion <sup>a</sup><br>(%) |     | Major<br>diastereomer <sup>a</sup><br>(%) |    | <i>ee</i> <sup>b</sup><br>(%) |    |
|------------|--------------------------------|-----|-------------------------------------------|----|-------------------------------|----|------------|--------------------------------|-----|-------------------------------------------|----|-------------------------------|----|
| Cat:       | 1                              | 2   | 1                                         | 2  | 1                             | 2  |            | 1                              | 2   | 1                                         | 2  | 1                             | 2  |
| <b>S1</b>  | >95                            | >95 | 90                                        | 90 | 85                            | 96 | <b>S19</b> | >95                            | >95 | 90                                        | 94 | 86                            | 96 |
| <b>S2</b>  | >95                            | >95 | 90                                        | 90 | 84                            | 96 | <b>S20</b> | >95                            | >95 | 91                                        | 91 | 86                            | 96 |
| <b>S3</b>  | >95                            | >95 | 90                                        | 89 | 85                            | 96 | <b>S21</b> | >95                            | >95 | 90                                        | 89 | 71                            | 96 |
| <b>S4</b>  | >95                            | >95 | 89                                        | 90 | 84                            | 96 | <b>S22</b> | >95                            | >95 | 90                                        | 91 | 75                            | 96 |
| <b>S5</b>  | >95                            | >95 | 91                                        | 87 | 88                            | 96 | <b>S23</b> | >95                            | >95 | 92                                        | 91 | 86                            | 96 |
| <b>S6</b>  | >95                            | >95 | 91                                        | 87 | 88                            | 96 | <b>S24</b> | >95                            | >95 | 96                                        | 90 | 84                            | 95 |
| <b>S7</b>  | >95                            | >95 | 90                                        | 89 | 87                            | 96 | <b>S25</b> | >95                            | >95 | 91                                        | 93 | 84                            | 96 |
| <b>S8</b>  | >95                            | >95 | 90                                        | 89 | 86                            | 96 | <b>S26</b> | >95                            | >95 | 88                                        | 89 | 87                            | 97 |
| <b>S9</b>  | >95                            | >95 | 91                                        | 91 | 86                            | 96 | <b>S27</b> | >95                            | >95 | 92                                        | 94 | 90                            | 96 |
| <b>S10</b> | >95                            | >95 | 92                                        | 93 | 89                            | 96 | <b>S28</b> | >95                            | >95 | 88                                        | 91 | 87                            | 95 |
| <b>S11</b> | >95                            | >95 | 92                                        | 95 | 80                            | 96 | <b>S29</b> | >95                            | >95 | 90                                        | 89 | 82                            | 95 |
| <b>S12</b> | >95                            | >95 | 92                                        | 94 | 89                            | 96 | <b>S30</b> | >95                            | >95 | 90                                        | 95 | 83                            | 96 |
| <b>S13</b> | >95                            | >95 | 88                                        | 89 | 88                            | 96 | <b>S31</b> | >95                            | >95 | 90                                        | 95 | 84                            | 95 |
| <b>S14</b> | >95                            | >95 | 89                                        | 91 | 87                            | 96 | <b>S32</b> | >95                            | >95 | 90                                        | 95 | 83                            | 95 |
| <b>S15</b> | >95                            | >95 | 87                                        | 91 | 86                            | 96 | <b>S33</b> | >95                            | >95 | 90                                        | 94 | 86                            | 96 |
| <b>S16</b> | >95                            | >95 | 92                                        | 90 | 88                            | 96 | <b>S34</b> | >95                            | >95 | 96                                        | 94 | 84                            | 95 |
| <b>S17</b> | >95                            | >95 | 90                                        | 91 | 79                            | 96 | <b>S35</b> | >95                            | >95 | 96                                        | 94 | 90                            | 96 |
| <b>S18</b> | >95                            | >95 | 90                                        | 90 | 83                            | 96 | <b>S36</b> | >95                            | >95 | 88                                        | 88 | 89                            | 96 |

<sup>a</sup>Determined by <sup>1</sup>H NMR spectroscopic analysis of the crude mixture. <sup>b</sup>Determined by chiral stationary phase HPLC analysis.

### **<sup>1</sup>H NMR spectra of the reactions in the presence of H-DPro-Pro-Glu-NH<sub>2</sub> 1:**

A sample of 50  $\mu$ L from the crude reaction mixture was added to an NMR tube that contained 600  $\mu$ L CDCl<sub>3</sub>. Vigorous shaking or vortexing ensured extraction of the reaction products from the mixture. Conversion was determined by comparing the integrals of the olefinic signal of nitrostyrene and the RCH=O signals of the  $\gamma$ -nitroaldehyde. The diastereomeric ratio was determined by integration of the RCH=O signals of the  $\gamma$ -nitroaldehyde.

#### **MilliQ water (S1):**

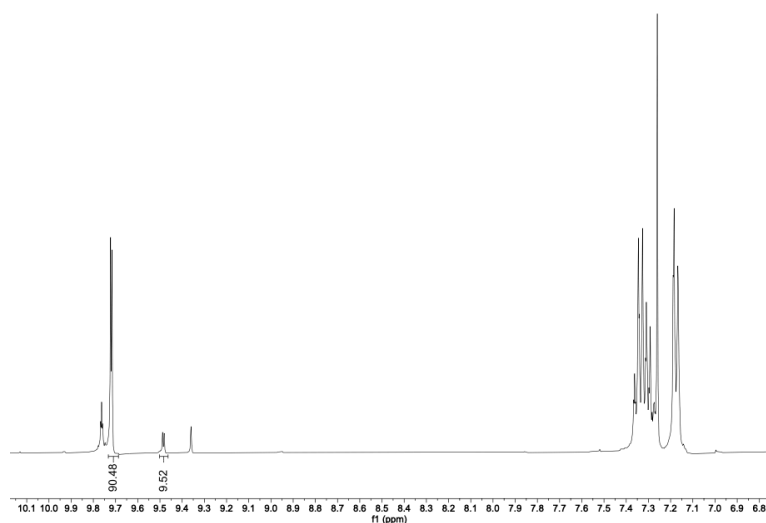

#### **Tab water (S2):**

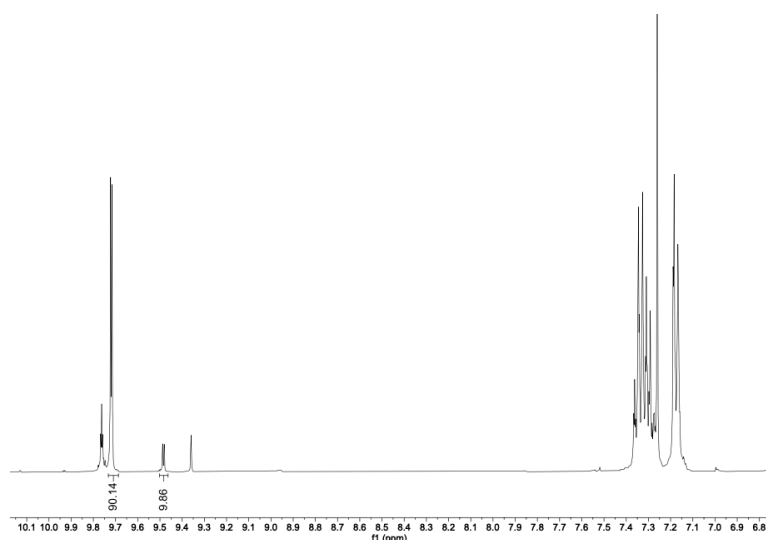



### Lake Zürich water (S3):

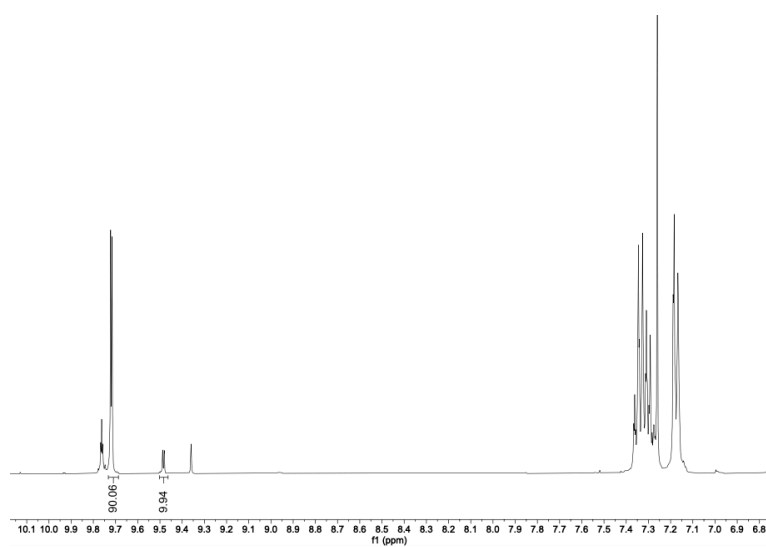

### River Limmat water (S4):

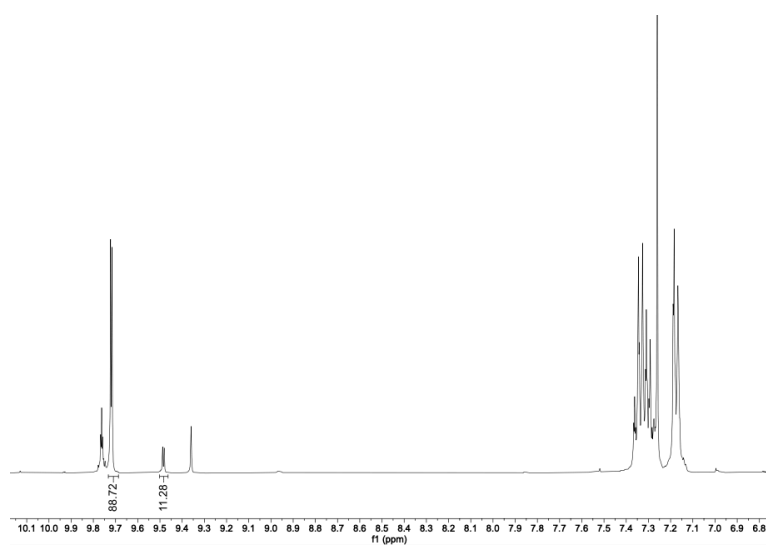

### Milk (S5):

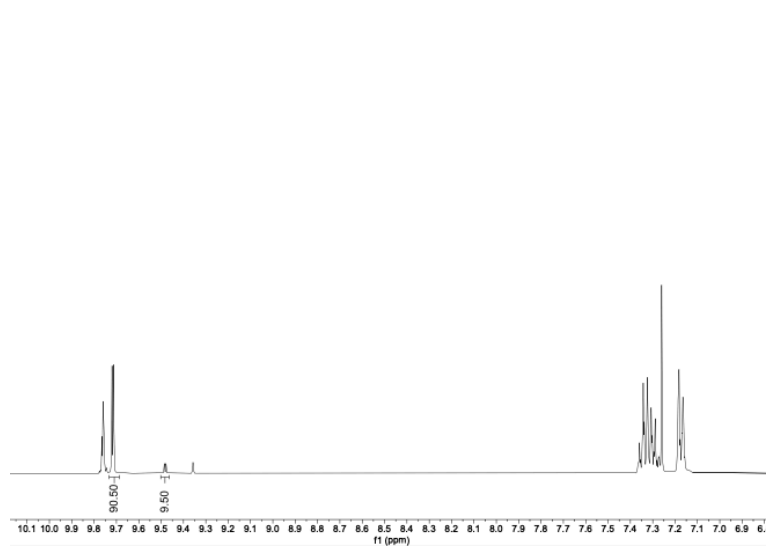

### Low fat milk (S6):

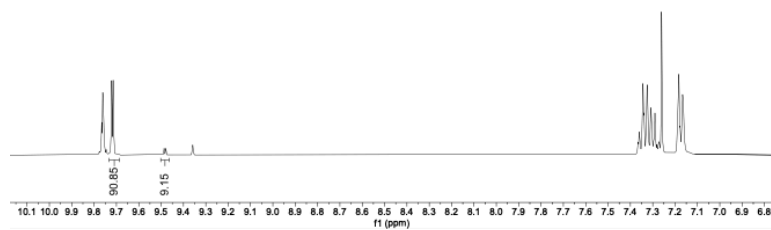

### Soya milk (S7):

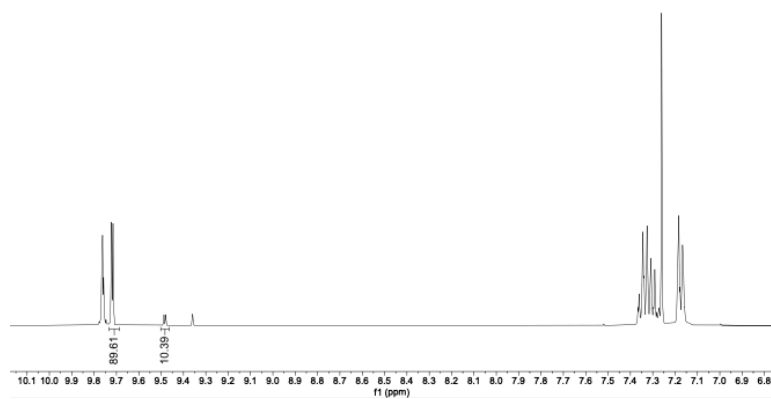

### Almond milk (S8):

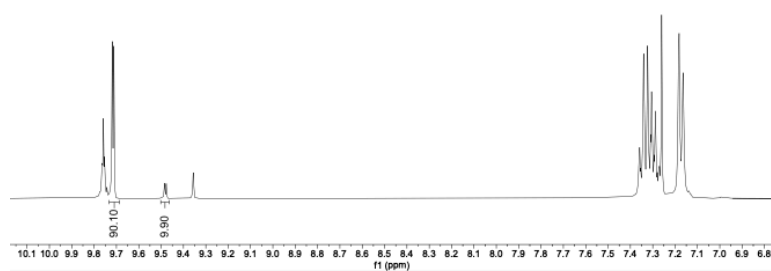

**Rice milk (S9):**

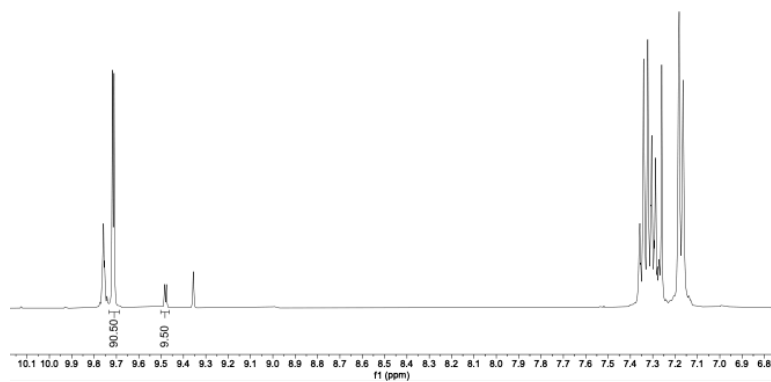

**Orange juice (S10):**

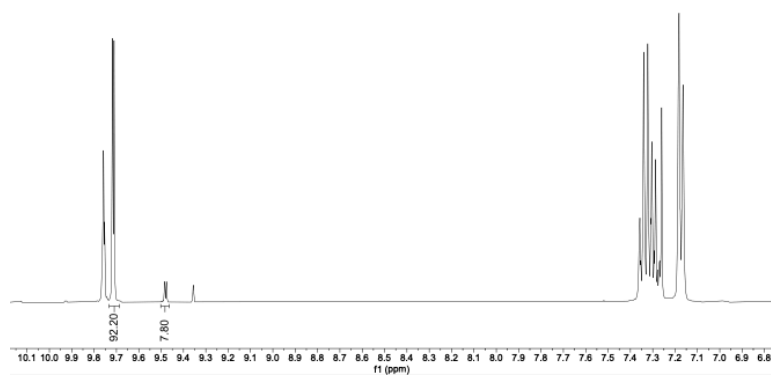

**Blood orange juice (S11):**

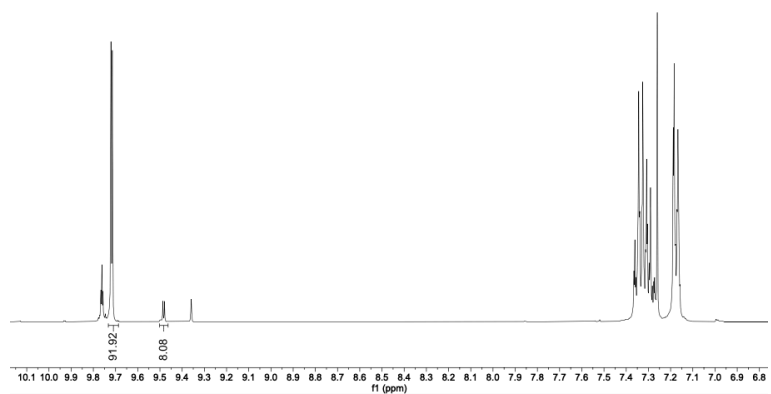

### Apple juice (S12):

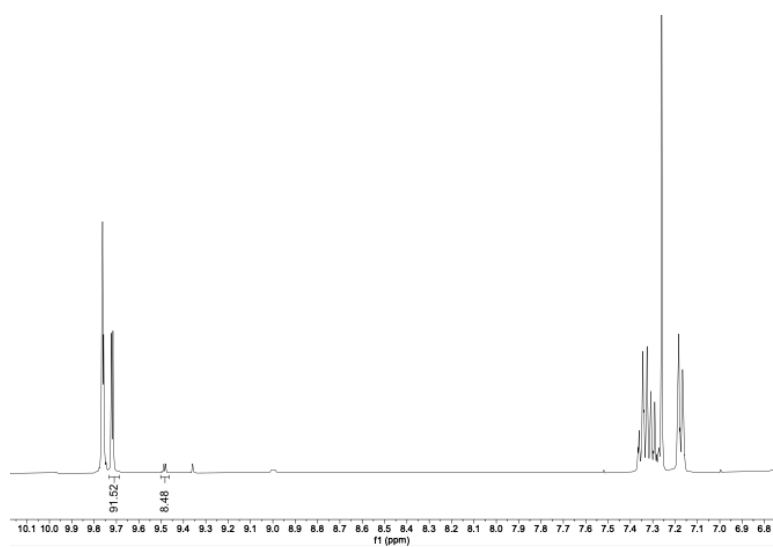

### Coconut water (S13):

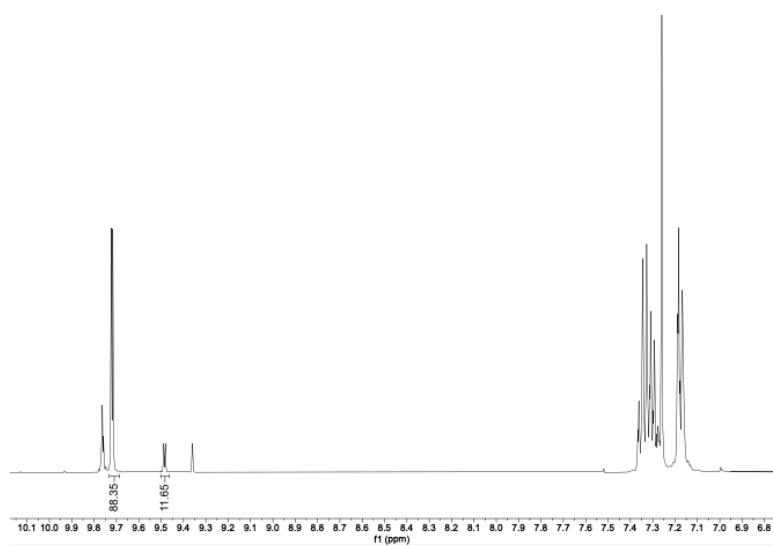

### Carrot juice (S14):

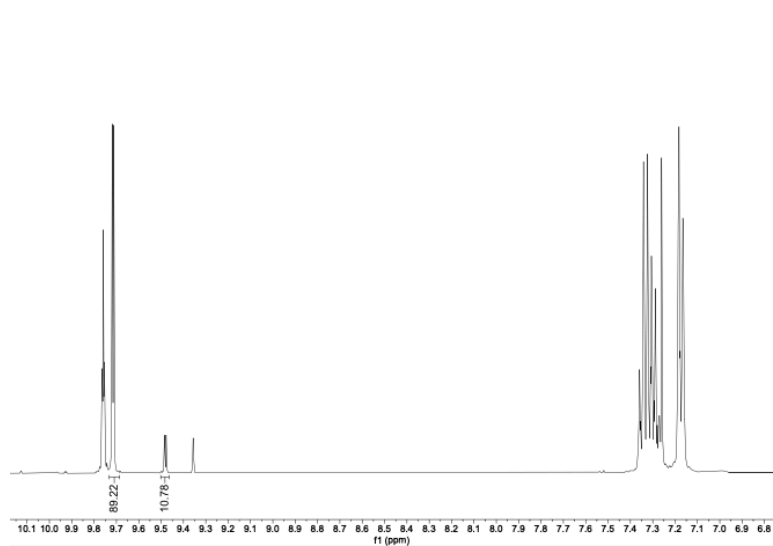

### Beetroot juice (S15):

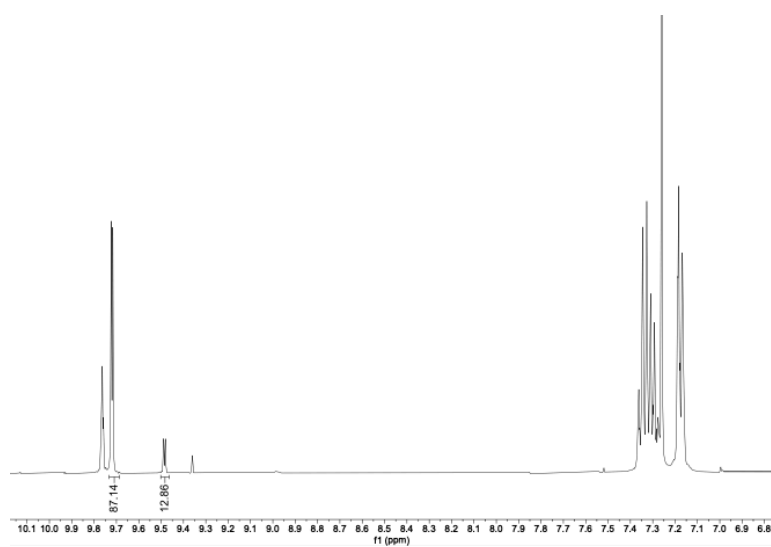

### Coffee (S16):

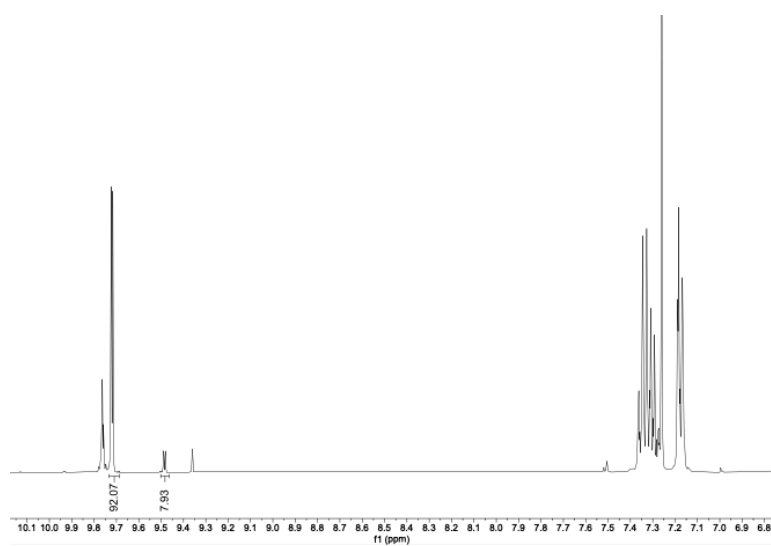

### Green tea (S17):

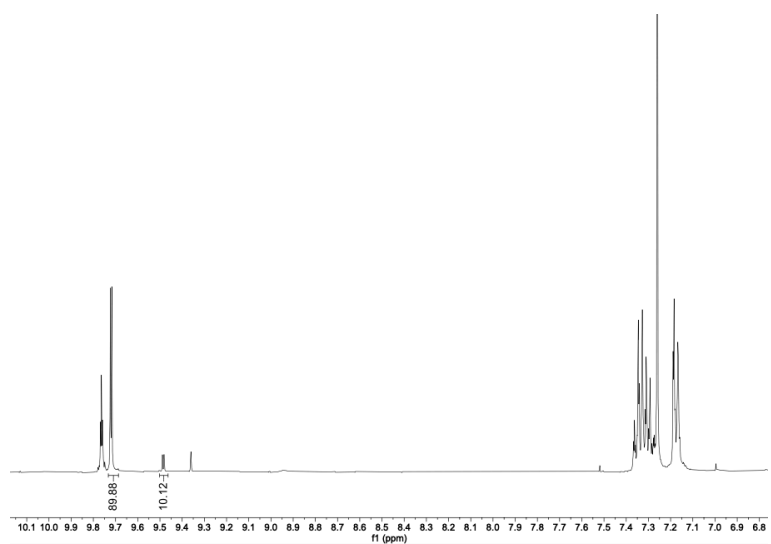

### Black tea (S18):

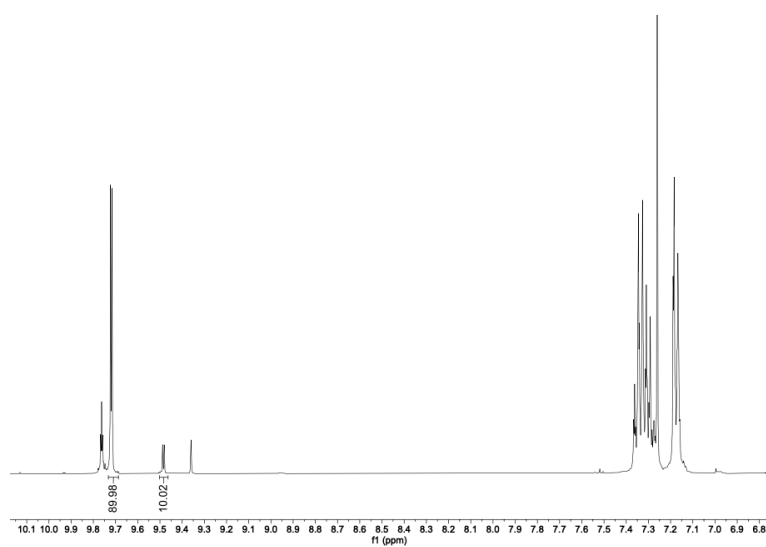

### Peppermint tea (S19):

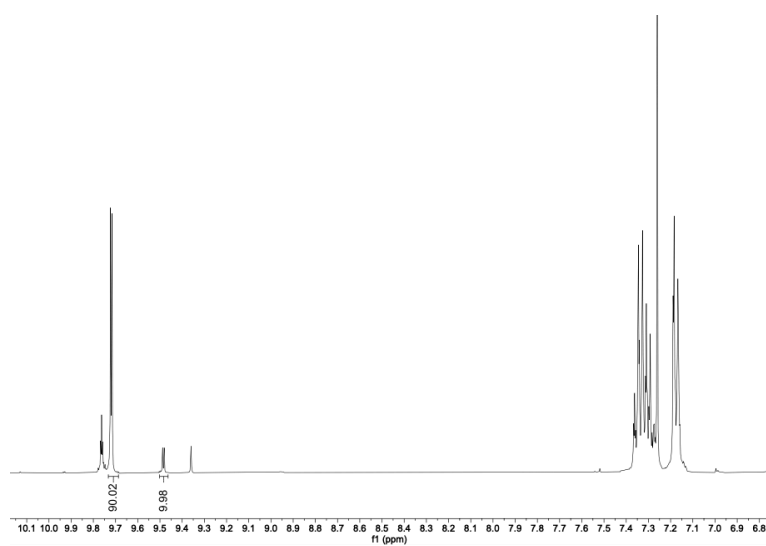

### Fruit tea (S20):

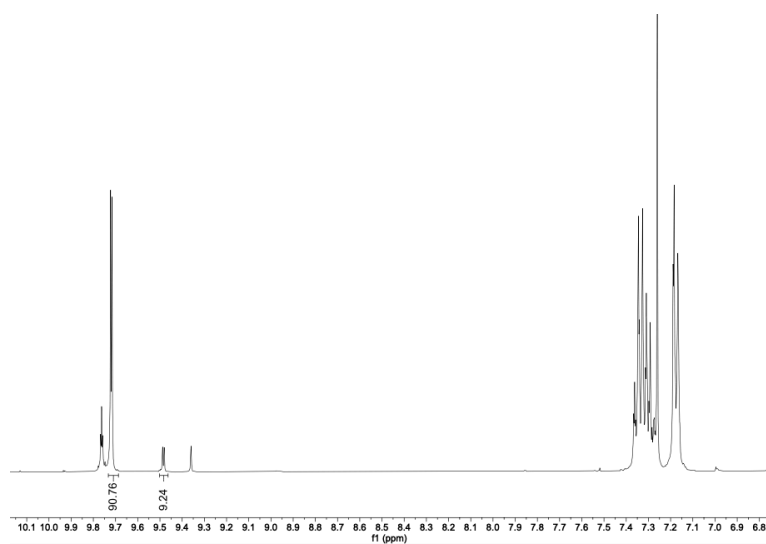

### Honey solution 5 wt% (S21):

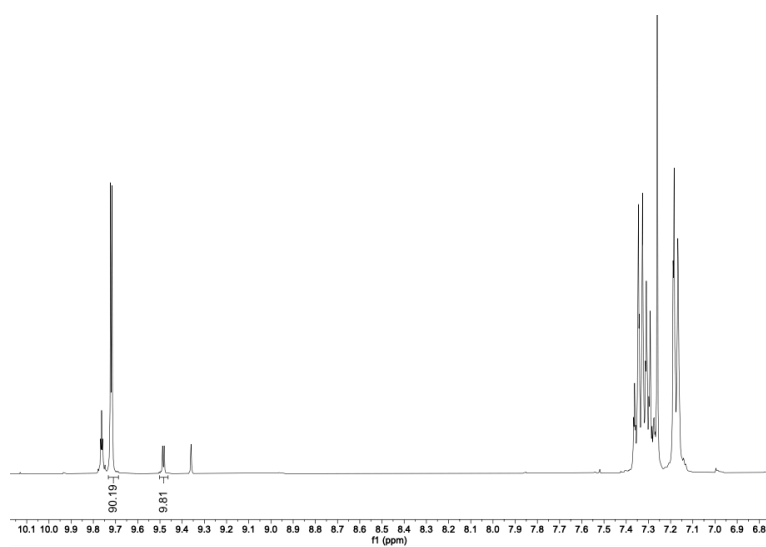

### Coke (S22):

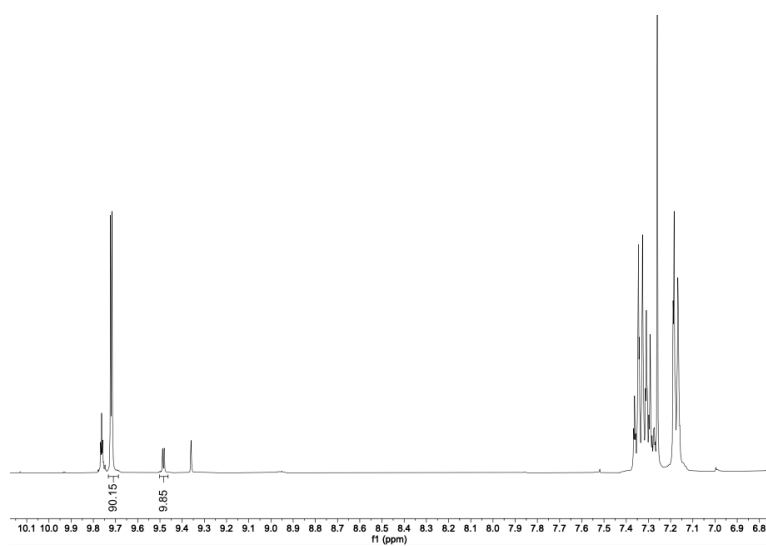

### Rivella (S23):

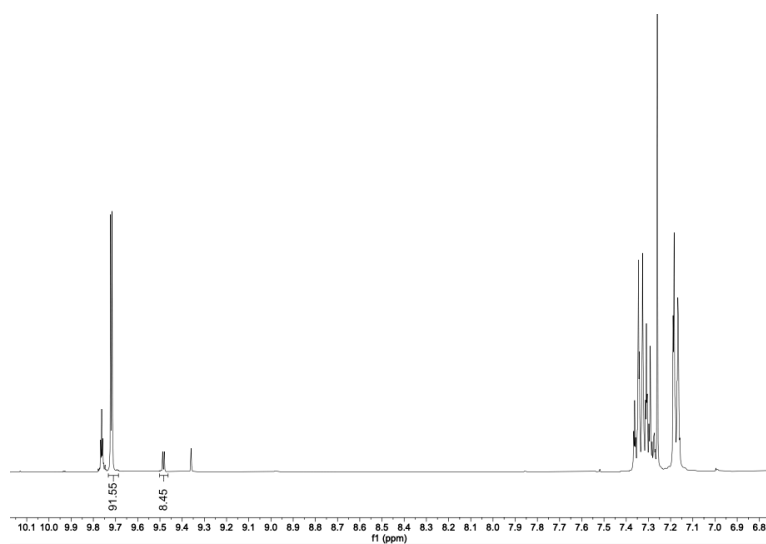

### Diet Rivella (S24):

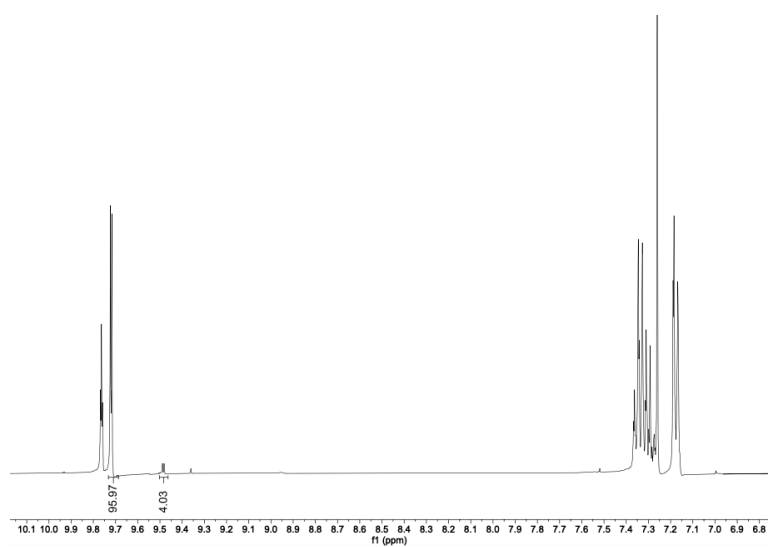

### Ice tea (S25):

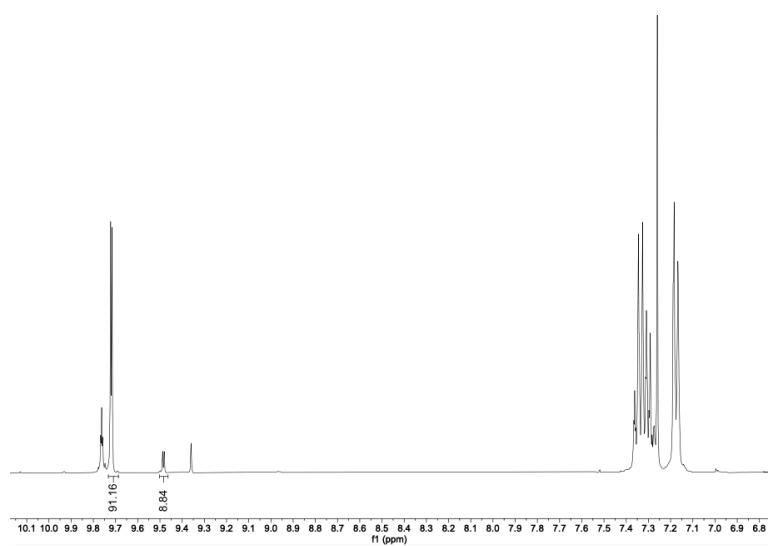

### Beer (S26):

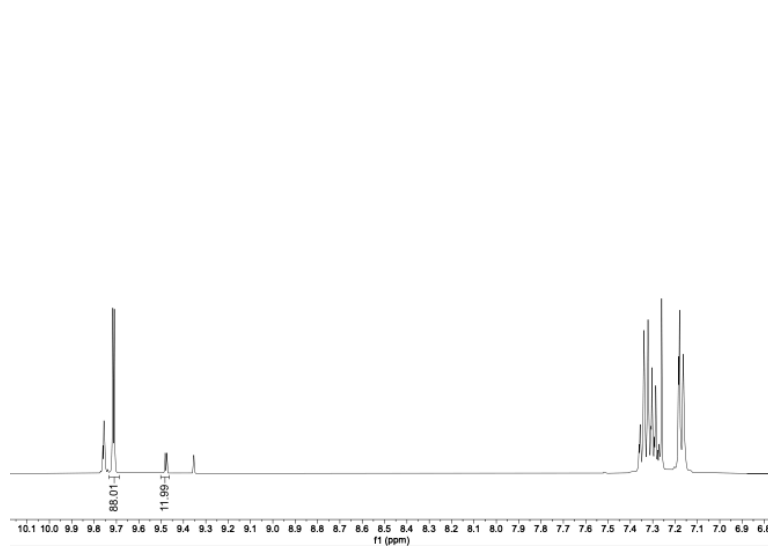



### Red wine (S27):

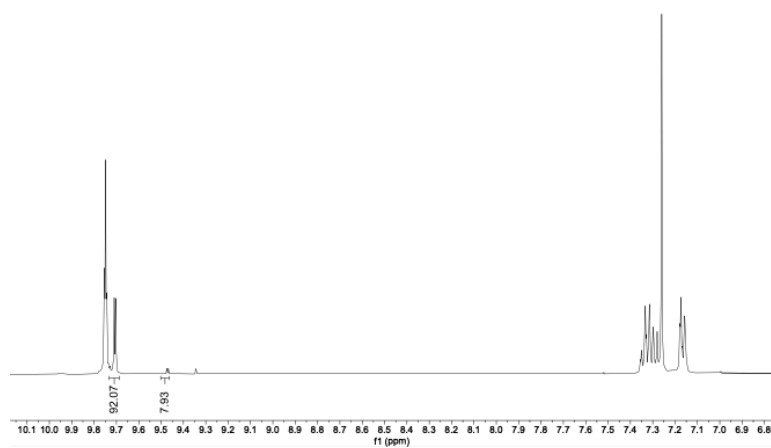

### Amaretto (S28):

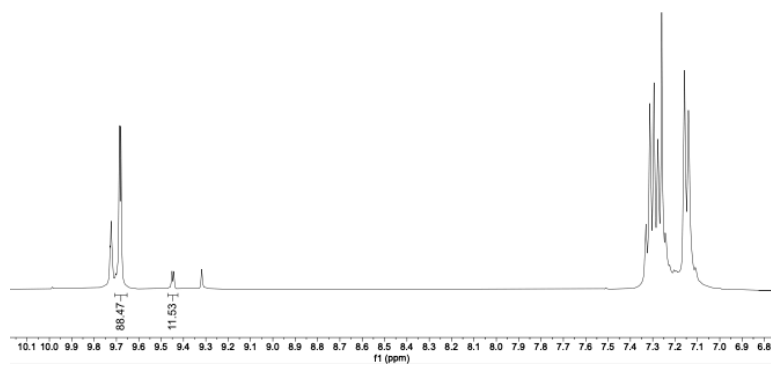

### Herb Liqueur – “Jägermeister” (S29):

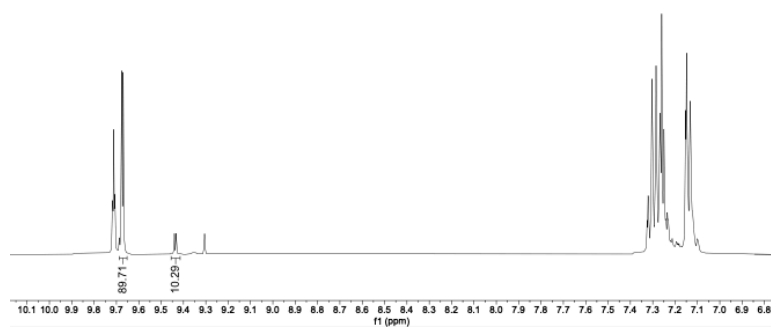

### Scotch Whisky – Aberlour 18 y (S30):

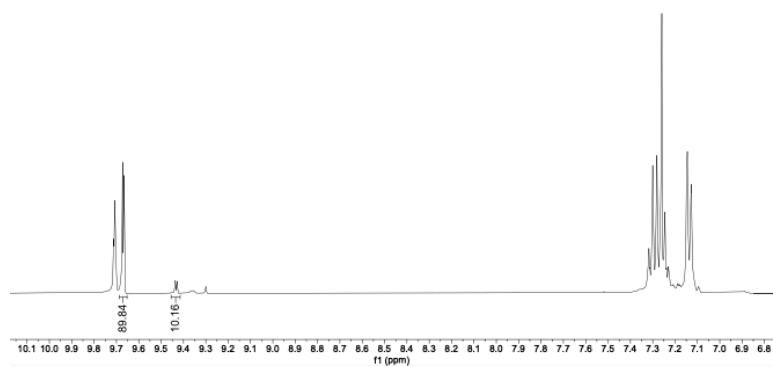

### Vodka (S31):

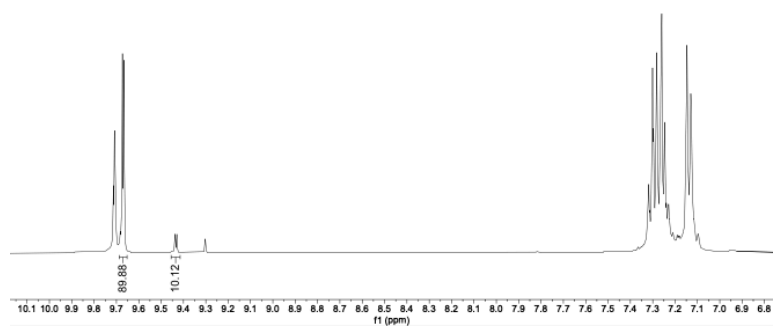

### Gin (S32):

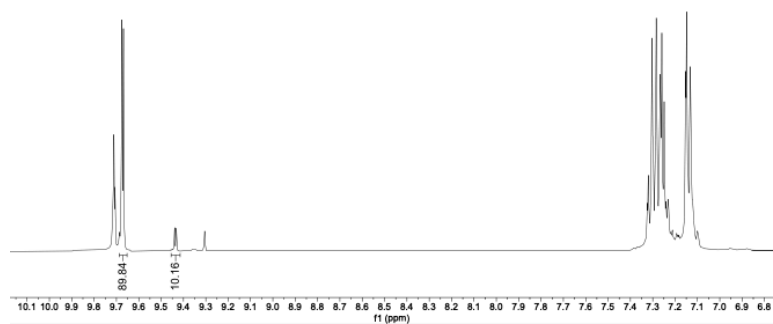

### Rum (S33):

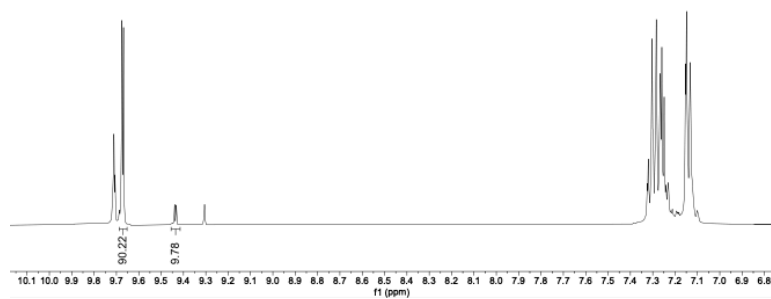

### Aceto balsamico (S34):

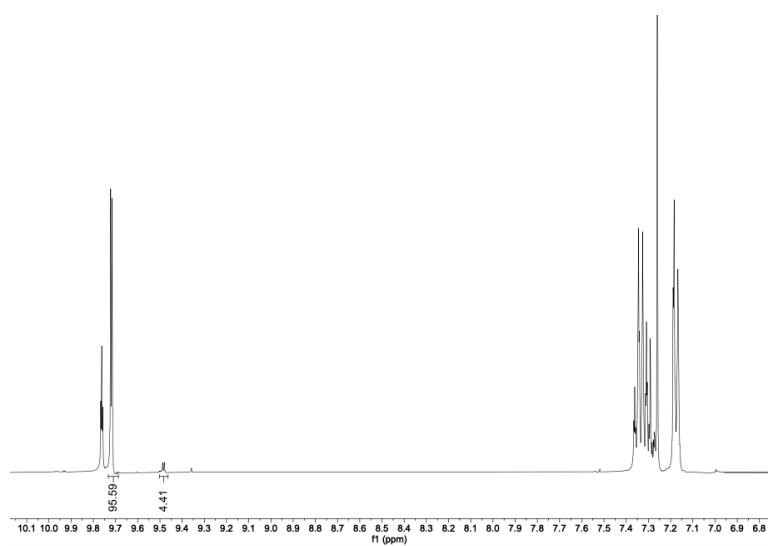

### Herb vinegar (S35):

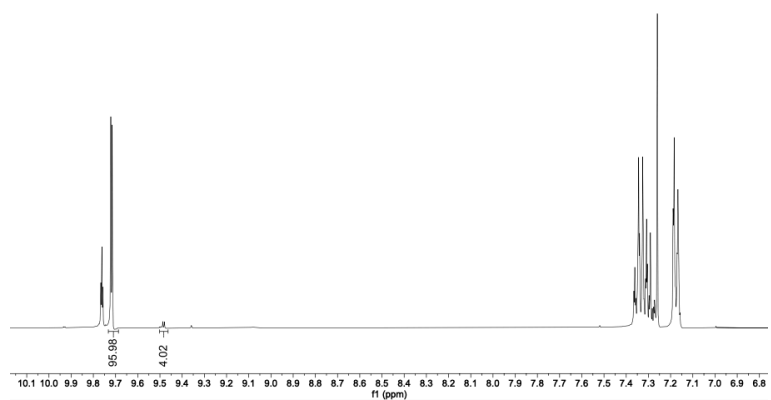

**Olive oil (S36):**

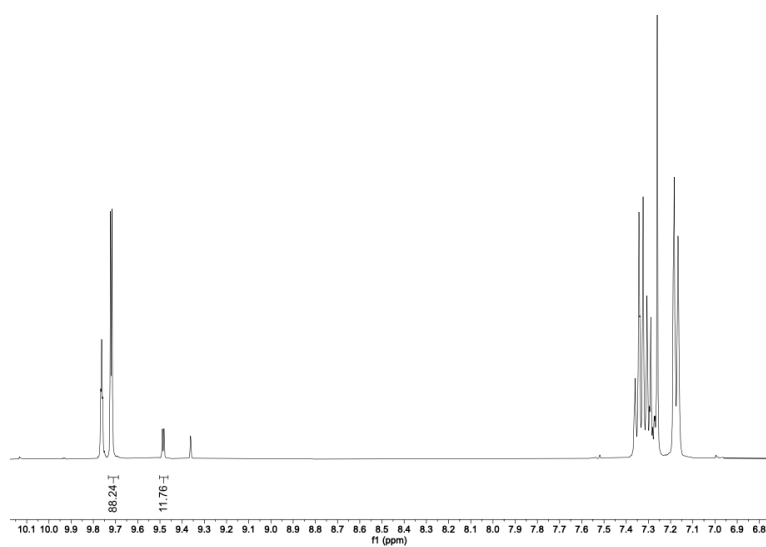

## HPLC chromatograms of the reactions in presence of H-dPro-Pro-Glu-NH<sub>2</sub> 1:

### MilliQ water (S1):

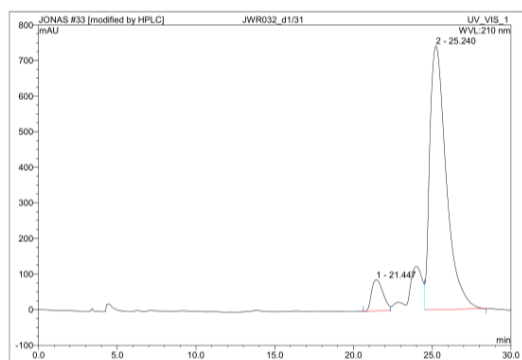

| No.    | Ret.Time<br>min | Peak Name | Height<br>mAU | Area<br>mAU*min | Rel.Area<br>% | Amount | Type |
|--------|-----------------|-----------|---------------|-----------------|---------------|--------|------|
| 1      | 21.45           | n.a.      | 87.969        | 74.077          | 7.62          | n.a.   | BM * |
| 2      | 25.24           | n.a.      | 741.386       | 898.663         | 92.38         | n.a.   | MB*  |
| Total: |                 |           | 829.355       | 972.740         | 100.00        | 0.000  |      |

### Tab water (S2):

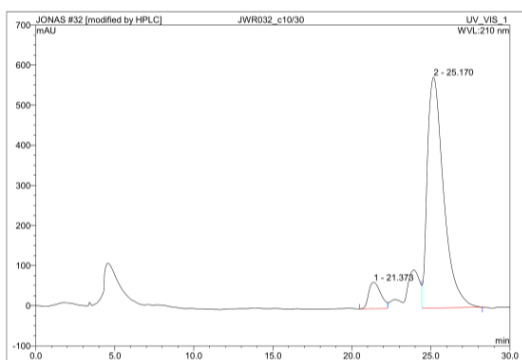

| No.    | Ret.Time<br>min | Peak Name | Height<br>mAU | Area<br>mAU*min | Rel.Area<br>% | Amount | Type |
|--------|-----------------|-----------|---------------|-----------------|---------------|--------|------|
| 1      | 21.37           | n.a.      | 65.737        | 58.222          | 7.79          | n.a.   | BM * |
| 2      | 25.17           | n.a.      | 575.397       | 689.270         | 92.21         | n.a.   | MB*  |
| Total: |                 |           | 641.134       | 747.493         | 100.00        | 0.000  |      |

### Lake Zürich water (S3):

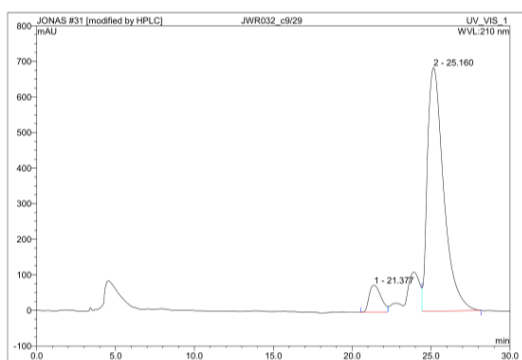

| No.    | Ret.Time<br>min | Peak Name | Height<br>mAU | Area<br>mAU*min | Rel.Area<br>% | Amount | Type |
|--------|-----------------|-----------|---------------|-----------------|---------------|--------|------|
| 1      | 21.38           | n.a.      | 75.305        | 65.313          | 7.40          | n.a.   | BM * |
| 2      | 25.16           | n.a.      | 685.146       | 817.527         | 92.60         | n.a.   | MB*  |
| Total: |                 |           | 760.451       | 882.840         | 100.00        | 0.000  |      |

## River Limmat water (S4):

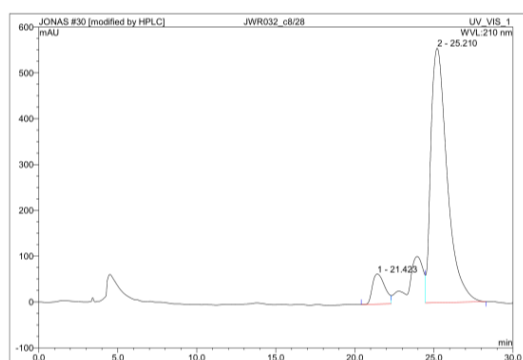

| No.    | Ret.Time<br>min | Peak Name | Height<br>mAU | Area<br>mAU*min | Rel.Area<br>% | Amount | Type |
|--------|-----------------|-----------|---------------|-----------------|---------------|--------|------|
| 1      | 21.42           | n.a.      | 65.450        | 59.417          | 8.17          | n.a.   | BM * |
| 2      | 25.21           | n.a.      | 555.413       | 667.520         | 91.83         | n.a.   | MB*  |
| Total: |                 |           | 620.862       | 726.936         | 100.00        | 0.000  |      |

## Milk (S5):

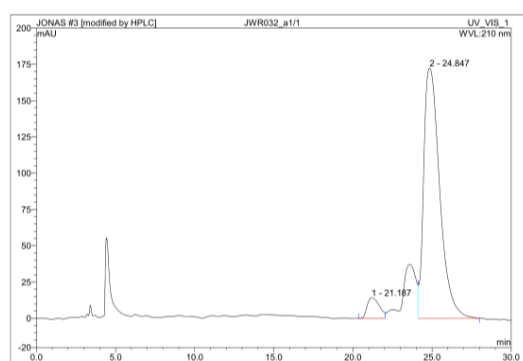

| No.    | Ret.Time<br>min | Peak Name | Height<br>mAU | Area<br>mAU*min | Rel.Area<br>% | Amount | Type |
|--------|-----------------|-----------|---------------|-----------------|---------------|--------|------|
| 1      | 21.19           | n.a.      | 14.084        | 12.667          | 5.92          | n.a.   | BM * |
| 2      | 24.85           | n.a.      | 172.321       | 201.237         | 94.08         | n.a.   | MB*  |
| Total: |                 |           | 186.406       | 213.905         | 100.00        | 0.000  |      |

## Low fat milk (S6):

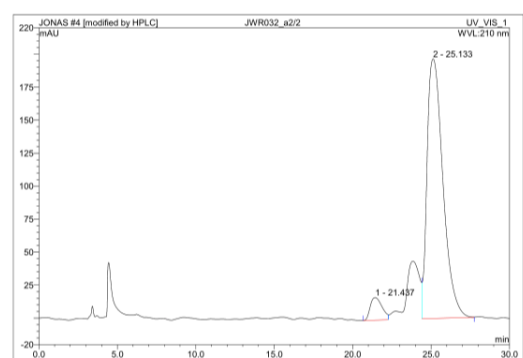

| No.    | Ret.Time<br>min | Peak Name | Height<br>mAU | Area<br>mAU*min | Rel.Area<br>% | Amount | Type |
|--------|-----------------|-----------|---------------|-----------------|---------------|--------|------|
| 1      | 21.44           | n.a.      | 17.120        | 14.889          | 6.05          | n.a.   | BM * |
| 2      | 25.13           | n.a.      | 196.662       | 231.112         | 93.95         | n.a.   | MB*  |
| Total: |                 |           | 213.782       | 246.000         | 100.00        | 0.000  |      |

## Soya milk (S7):

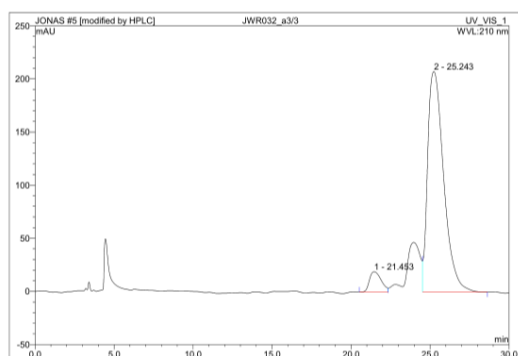

| No.    | Ret.Time<br>min | Peak Name | Height<br>mAU | Area<br>mAU*min | Rel.Area<br>% | Amount | Type |
|--------|-----------------|-----------|---------------|-----------------|---------------|--------|------|
| 1      | 21.45           | n.a.      | 19.129        | 16.606          | 6.35          | n.a.   | BM * |
| 2      | 25.24           | n.a.      | 207.667       | 245.039         | 93.65         | n.a.   | MB*  |
| Total: |                 |           | 226.796       | 261.645         | 100.00        | 0.000  |      |

## Almond milk (S8):

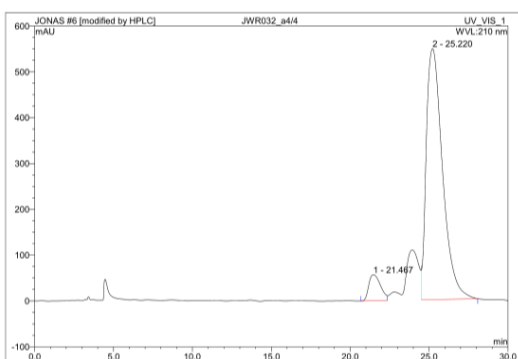

| No.    | Ret.Time<br>min | Peak Name | Height<br>mAU | Area<br>mAU*min | Rel.Area<br>% | Amount | Type |
|--------|-----------------|-----------|---------------|-----------------|---------------|--------|------|
| 1      | 21.47           | n.a.      | 56.763        | 49.016          | 6.96          | n.a.   | BM * |
| 2      | 25.22           | n.a.      | 547.828       | 655.391         | 93.04         | n.a.   | MB*  |
| Total: |                 |           | 604.591       | 704.407         | 100.00        | 0.000  |      |

## Rice milk (S9):

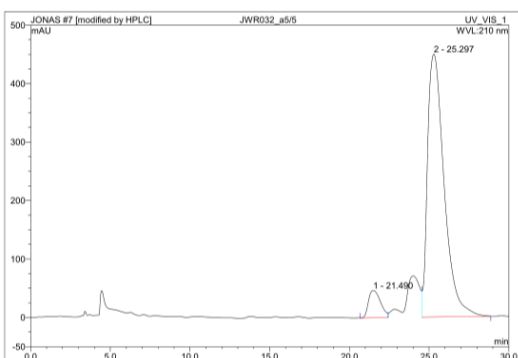

| No.    | Ret.Time<br>min | Peak Name | Height<br>mAU | Area<br>mAU*min | Rel.Area<br>% | Amount | Type |
|--------|-----------------|-----------|---------------|-----------------|---------------|--------|------|
| 1      | 21.49           | n.a.      | 46.640        | 40.858          | 7.00          | n.a.   | BM * |
| 2      | 25.30           | n.a.      | 449.498       | 543.122         | 93.00         | n.a.   | MB*  |
| Total: |                 |           | 496.138       | 583.980         | 100.00        | 0.000  |      |

## Orange juice (S10):

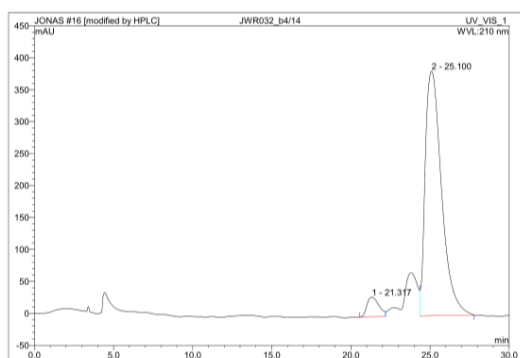

| No.    | Ret.Time<br>min | Peak Name | Height<br>mAU | Area<br>mAU*min | Rel.Area<br>% | Amount | Type |
|--------|-----------------|-----------|---------------|-----------------|---------------|--------|------|
| 1      | 21.32           | n.a.      | 30.577        | 26.968          | 5.56          | n.a.   | BM * |
| 2      | 25.10           | n.a.      | 382.973       | 458.421         | 94.44         | n.a.   | MB*  |
| Total: |                 |           | 413.550       | 485.389         | 100.00        | 0.000  |      |

## Blood orange juice (S11):

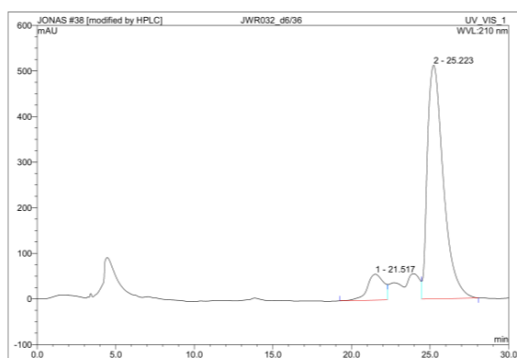

| No.    | Ret.Time<br>min | Peak Name | Height<br>mAU | Area<br>mAU*min | Rel.Area<br>% | Amount | Type |
|--------|-----------------|-----------|---------------|-----------------|---------------|--------|------|
| 1      | 21.52           | n.a.      | 56.764        | 68.128          | 10.12         | n.a.   | BM * |
| 2      | 25.22           | n.a.      | 512.496       | 605.138         | 89.88         | n.a.   | MB*  |
| Total: |                 |           | 569.260       | 673.266         | 100.00        | 0.000  |      |

## Apple juice (S12):

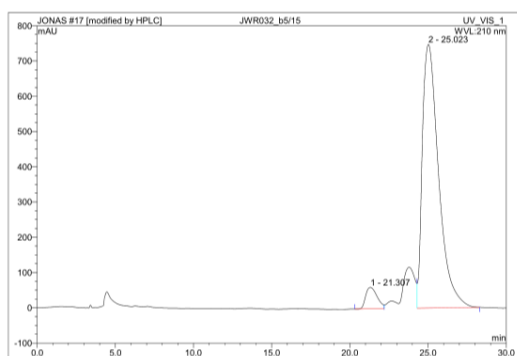

| No.    | Ret.Time<br>min | Peak Name | Height<br>mAU | Area<br>mAU*min | Rel.Area<br>% | Amount | Type |
|--------|-----------------|-----------|---------------|-----------------|---------------|--------|------|
| 1      | 21.31           | n.a.      | 60.740        | 51.595          | 5.41          | n.a.   | BM * |
| 2      | 25.02           | n.a.      | 747.797       | 902.339         | 94.59         | n.a.   | MB*  |
| Total: |                 |           | 808.537       | 953.934         | 100.00        | 0.000  |      |



## Coconut water (S13):

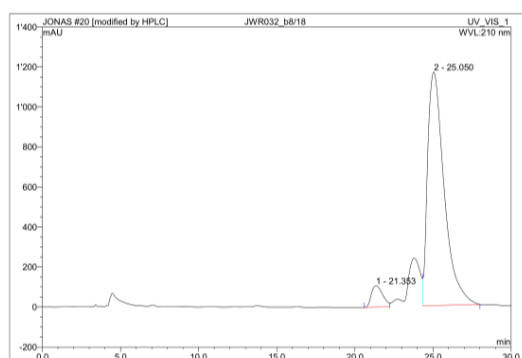

| No.    | Ret.Time<br>min | Peak Name | Height<br>mAU | Area<br>mAU*min | Rel.Area<br>% | Amount | Type |
|--------|-----------------|-----------|---------------|-----------------|---------------|--------|------|
| 1      | 21.35           | n.a.      | 105.833       | 89.275          | 5.85          | n.a.   | BM * |
| 2      | 25.05           | n.a.      | 1167.053      | 1437.061        | 94.15         | n.a.   | MB*  |
| Total: |                 |           | 1272.887      | 1526.336        | 100.00        | 0.000  |      |

## Carrot juice (S14):

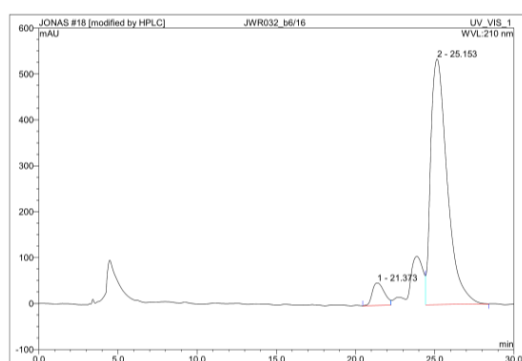

| No.    | Ret.Time<br>min | Peak Name | Height<br>mAU | Area<br>mAU*min | Rel.Area<br>% | Amount | Type |
|--------|-----------------|-----------|---------------|-----------------|---------------|--------|------|
| 1      | 21.37           | n.a.      | 49.223        | 43.482          | 6.30          | n.a.   | BM * |
| 2      | 25.15           | n.a.      | 534.889       | 647.107         | 93.70         | n.a.   | MB*  |
| Total: |                 |           | 584.112       | 690.589         | 100.00        | 0.000  |      |

## Beetroot juice (S15):

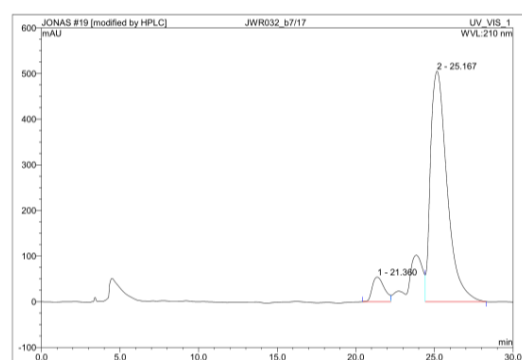

| No.    | Ret.Time<br>min | Peak Name | Height<br>mAU | Area<br>mAU*min | Rel.Area<br>% | Amount | Type |
|--------|-----------------|-----------|---------------|-----------------|---------------|--------|------|
| 1      | 21.36           | n.a.      | 53.774        | 47.670          | 7.16          | n.a.   | BM * |
| 2      | 25.17           | n.a.      | 505.052       | 617.841         | 92.84         | n.a.   | MB*  |
| Total: |                 |           | 558.826       | 665.511         | 100.00        | 0.000  |      |

## Coffee (S16):

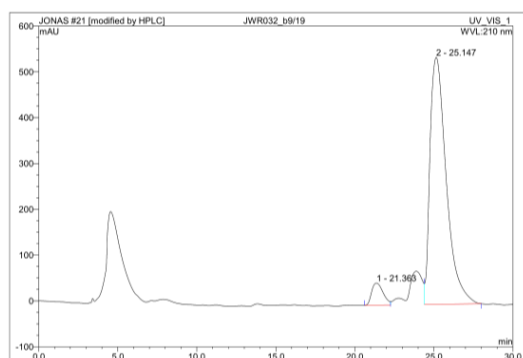

| No.    | Ret.Time<br>min | Peak Name | Height<br>mAU | Area<br>mAU*min | Rel.Area<br>% | Amount | Type |
|--------|-----------------|-----------|---------------|-----------------|---------------|--------|------|
| 1      | 21.36           | n.a.      | 48.078        | 40.295          | 5.89          | n.a.   | BM * |
| 2      | 25.15           | n.a.      | 538.978       | 643.817         | 94.11         | n.a.   | MB*  |
| Total: |                 |           | 587.056       | 684.112         | 100.00        | 0.000  |      |

## Green tea (S17):

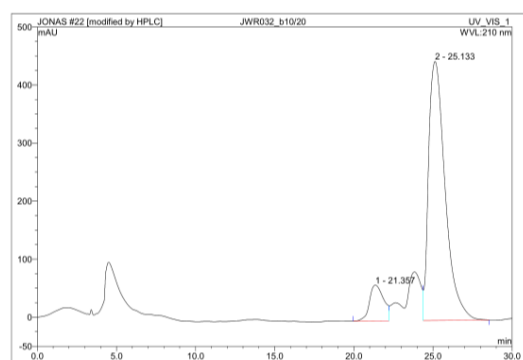

| No.    | Ret.Time<br>min | Peak Name | Height<br>mAU | Area<br>mAU*min | Rel.Area<br>% | Amount | Type |
|--------|-----------------|-----------|---------------|-----------------|---------------|--------|------|
| 1      | 21.36           | n.a.      | 61.641        | 63.923          | 10.55         | n.a.   | BM * |
| 2      | 25.13           | n.a.      | 446.142       | 542.205         | 89.45         | n.a.   | MB*  |
| Total: |                 |           | 507.783       | 606.128         | 100.00        | 0.000  |      |

## Black tea (S18):

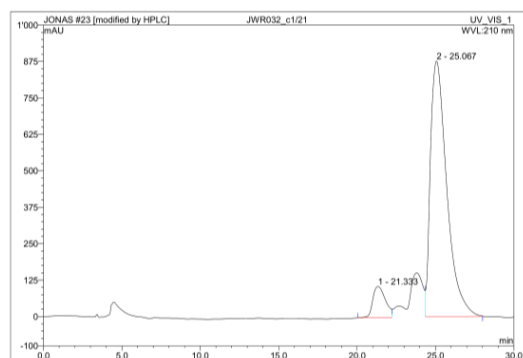

| No.    | Ret.Time<br>min | Peak Name | Height<br>mAU | Area<br>mAU*min | Rel.Area<br>% | Amount | Type |
|--------|-----------------|-----------|---------------|-----------------|---------------|--------|------|
| 1      | 21.33           | n.a.      | 106.545       | 99.556          | 8.56          | n.a.   | BM * |
| 2      | 25.07           | n.a.      | 876.880       | 1063.783        | 91.44         | n.a.   | MB*  |
| Total: |                 |           | 983.425       | 1163.340        | 100.00        | 0.000  |      |

## Peppermint tea (S19):

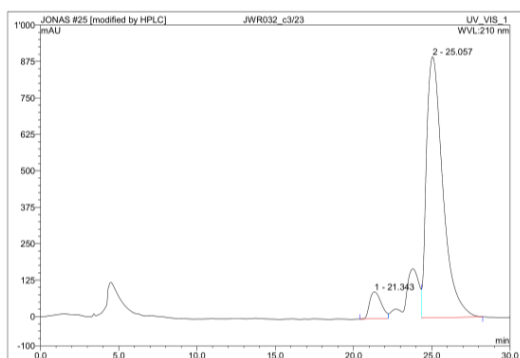

| No.    | Ret.Time<br>min | Peak Name | Height<br>mAU | Area<br>mAU*min | Rel.Area<br>% | Amount | Type |
|--------|-----------------|-----------|---------------|-----------------|---------------|--------|------|
| 1      | 21.34           | n.a.      | 91.867        | 79.718          | 6.82          | n.a.   | BM * |
| 2      | 25.06           | n.a.      | 895.273       | 1089.884        | 93.18         | n.a.   | MB*  |
| Total: |                 |           | 987.140       | 1169.602        | 100.00        | 0.000  |      |

## Fruit tea (S20):

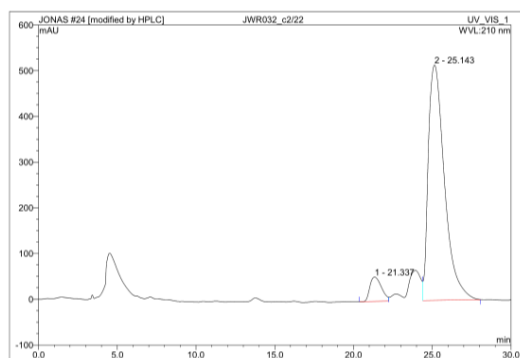

| No.    | Ret.Time<br>min | Peak Name | Height<br>mAU | Area<br>mAU*min | Rel.Area<br>% | Amount | Type |
|--------|-----------------|-----------|---------------|-----------------|---------------|--------|------|
| 1      | 21.34           | n.a.      | 53.026        | 45.408          | 6.90          | n.a.   | BM * |
| 2      | 25.14           | n.a.      | 514.646       | 612.285         | 93.10         | n.a.   | MB*  |
| Total: |                 |           | 567.672       | 657.692         | 100.00        | 0.000  |      |

## Honey solution 5 wt% (S21):

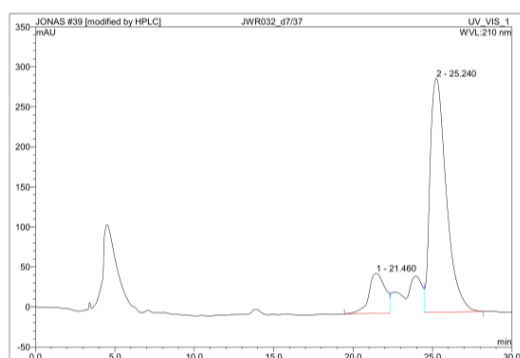

| No.    | Ret.Time<br>min | Peak Name | Height<br>mAU | Area<br>mAU*min | Rel.Area<br>% | Amount | Type |
|--------|-----------------|-----------|---------------|-----------------|---------------|--------|------|
| 1      | 21.46           | n.a.      | 50.044        | 59.132          | 14.50         | n.a.   | BM * |
| 2      | 25.24           | n.a.      | 292.524       | 348.797         | 85.50         | n.a.   | MB*  |
| Total: |                 |           | 342.569       | 407.929         | 100.00        | 0.000  |      |

## Coke (S22):

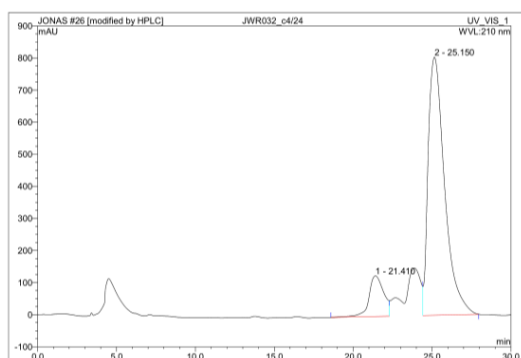

| No.    | Ret.Time<br>min | Peak Name | Height<br>mAU | Area<br>mAU*min | Rel.Area<br>% | Amount | Type |
|--------|-----------------|-----------|---------------|-----------------|---------------|--------|------|
| 1      | 21.41           | n.a.      | 126.247       | 136.346         | 12.28         | n.a.   | BM * |
| 2      | 25.15           | n.a.      | 804.296       | 973.627         | 87.72         | n.a.   | MB*  |
| Total: |                 |           | 930.543       | 1109.973        | 100.00        | 0.000  |      |

## Rivella (S23):

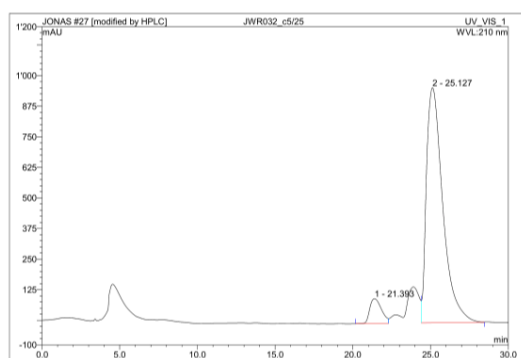

| No.    | Ret.Time<br>min | Peak Name | Height<br>mAU | Area<br>mAU*min | Rel.Area<br>% | Amount | Type |
|--------|-----------------|-----------|---------------|-----------------|---------------|--------|------|
| 1      | 21.39           | n.a.      | 101.090       | 88.544          | 7.02          | n.a.   | BM * |
| 2      | 25.13           | n.a.      | 960.501       | 1172.134        | 92.98         | n.a.   | MB*  |
| Total: |                 |           | 1061.591      | 1260.678        | 100.00        | 0.000  |      |

## Diet Rivella (S24):

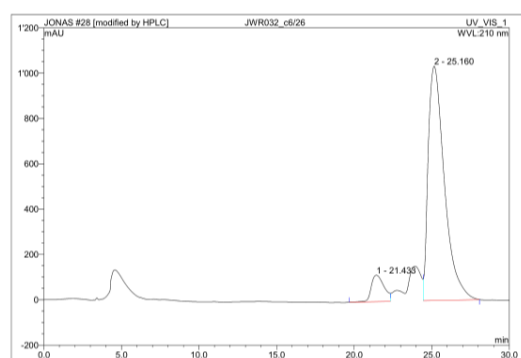

| No.    | Ret.Time<br>min | Peak Name | Height<br>mAU | Area<br>mAU*min | Rel.Area<br>% | Amount | Type |
|--------|-----------------|-----------|---------------|-----------------|---------------|--------|------|
| 1      | 21.43           | n.a.      | 116.778       | 111.964         | 8.18          | n.a.   | BM * |
| 2      | 25.16           | n.a.      | 1033.797      | 1256.250        | 91.82         | n.a.   | MB*  |
| Total: |                 |           | 1150.575      | 1368.214        | 100.00        | 0.000  |      |

## Ice tea (S25):

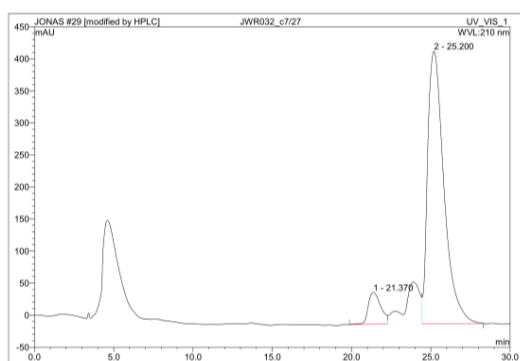

| No.    | Ret.Time<br>min | Peak Name | Height<br>mAU | Area<br>mAU*min | Rel.Area<br>% | Amount | Type |
|--------|-----------------|-----------|---------------|-----------------|---------------|--------|------|
| 1      | 21.37           | n.a.      | 49.374        | 45.422          | 8.21          | n.a.   | BM * |
| 2      | 25.20           | n.a.      | 425.564       | 507.889         | 91.79         | n.a.   | MB*  |
| Total: |                 |           | 474.938       | 553.311         | 100.00        | 0.000  |      |

## Beer (S26):

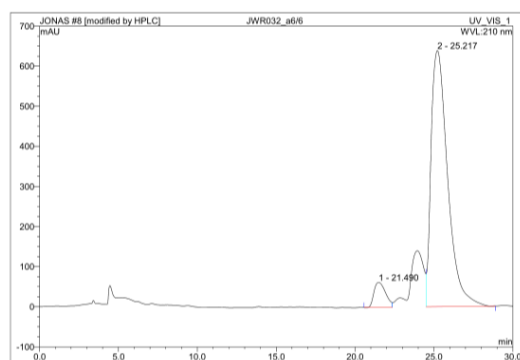

| No.    | Ret.Time<br>min | Peak Name | Height<br>mAU | Area<br>mAU*min | Rel.Area<br>% | Amount | Type |
|--------|-----------------|-----------|---------------|-----------------|---------------|--------|------|
| 1      | 21.49           | n.a.      | 62.261        | 53.409          | 6.41          | n.a.   | BM * |
| 2      | 25.22           | n.a.      | 638.841       | 779.374         | 93.59         | n.a.   | MB*  |
| Total: |                 |           | 701.101       | 832.784         | 100.00        | 0.000  |      |

## Red wine (S27):

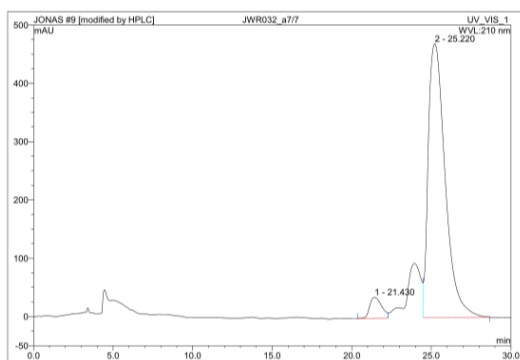

| No.    | Ret.Time<br>min | Peak Name | Height<br>mAU | Area<br>mAU*min | Rel.Area<br>% | Amount | Type |
|--------|-----------------|-----------|---------------|-----------------|---------------|--------|------|
| 1      | 21.43           | n.a.      | 35.883        | 31.276          | 5.12          | n.a.   | BM * |
| 2      | 25.22           | n.a.      | 469.928       | 579.639         | 94.88         | n.a.   | MB*  |
| Total: |                 |           | 505.811       | 610.915         | 100.00        | 0.000  |      |

## Amaretto (S28):

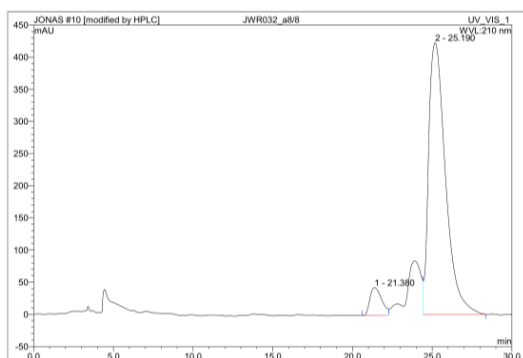

| No.    | Ret.Time<br>min | Peak Name | Height<br>mAU | Area<br>mAU*min | Rel.Area<br>% | Amount | Type |
|--------|-----------------|-----------|---------------|-----------------|---------------|--------|------|
| 1      | 21.38           | n.a.      | 42.868        | 36.878          | 6.63          | n.a.   | BM * |
| 2      | 25.19           | n.a.      | 423.162       | 519.656         | 93.37         | n.a.   | MB*  |
| Total: |                 |           | 466.031       | 556.535         | 100.00        | 0.000  |      |

## Herb Liqueur – “Jägermeister” (S29):

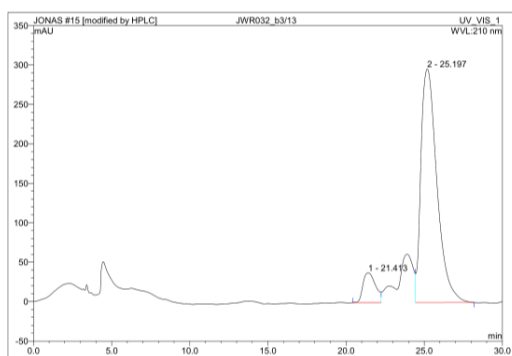

| No.    | Ret.Time<br>min | Peak Name | Height<br>mAU | Area<br>mAU*min | Rel.Area<br>% | Amount | Type |
|--------|-----------------|-----------|---------------|-----------------|---------------|--------|------|
| 1      | 21.41           | n.a.      | 37.863        | 35.146          | 9.07          | n.a.   | BM * |
| 2      | 25.20           | n.a.      | 296.222       | 352.573         | 90.93         | n.a.   | MB*  |
| Total: |                 |           | 334.085       | 387.721         | 100.00        | 0.000  |      |

## Scotch Whisky – Aberlour 18 y (S30):

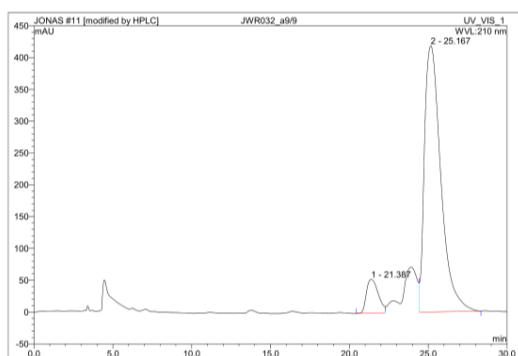

| No.    | Ret.Time<br>min | Peak Name | Height<br>mAU | Area<br>mAU*min | Rel.Area<br>% | Amount | Type |
|--------|-----------------|-----------|---------------|-----------------|---------------|--------|------|
| 1      | 21.39           | n.a.      | 53.174        | 46.364          | 8.42          | n.a.   | BM * |
| 2      | 25.17           | n.a.      | 418.639       | 504.577         | 91.58         | n.a.   | MB*  |
| Total: |                 |           | 471.812       | 550.940         | 100.00        | 0.000  |      |

## Vodka (S31):

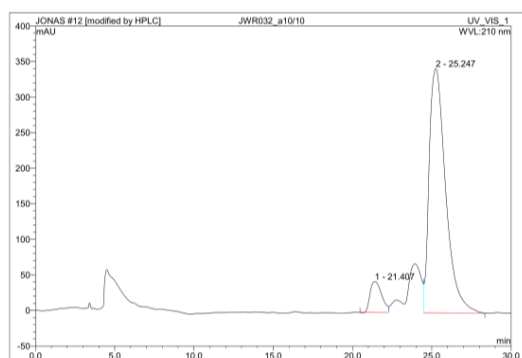

| No.    | Ret.Time<br>min | Peak Name | Height<br>mAU | Area<br>mAU*min | Rel.Area<br>% | Amount | Type |
|--------|-----------------|-----------|---------------|-----------------|---------------|--------|------|
| 1      | 21.41           | n.a.      | 43.667        | 37.241          | 8.24          | n.a.   | BM * |
| 2      | 25.25           | n.a.      | 343.580       | 414.642         | 91.76         | n.a.   | MB*  |
| Total: |                 |           | 387.247       | 451.883         | 100.00        | 0.000  |      |

## Gin (S32):

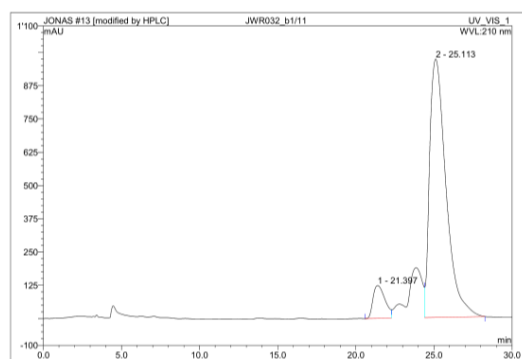

| No.    | Ret.Time<br>min | Peak Name | Height<br>mAU | Area<br>mAU*min | Rel.Area<br>% | Amount | Type |
|--------|-----------------|-----------|---------------|-----------------|---------------|--------|------|
| 1      | 21.40           | n.a.      | 123.539       | 109.900         | 8.49          | n.a.   | BM * |
| 2      | 25.11           | n.a.      | 971.086       | 1185.002        | 91.51         | n.a.   | MB*  |
| Total: |                 |           | 1094.625      | 1294.903        | 100.00        | 0.000  |      |

## Rum (S33):

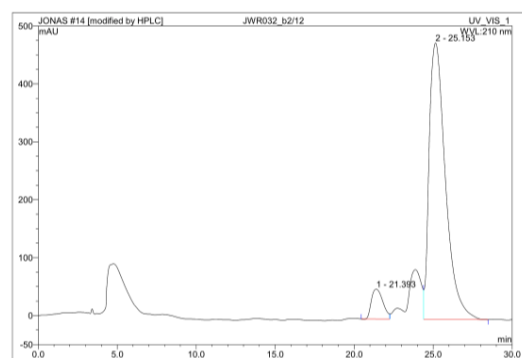

| No.    | Ret.Time<br>min | Peak Name | Height<br>mAU | Area<br>mAU*min | Rel.Area<br>% | Amount | Type |
|--------|-----------------|-----------|---------------|-----------------|---------------|--------|------|
| 1      | 21.39           | n.a.      | 51.471        | 43.657          | 7.09          | n.a.   | BM * |
| 2      | 25.15           | n.a.      | 477.146       | 572.121         | 92.91         | n.a.   | MB*  |
| Total: |                 |           | 528.617       | 615.777         | 100.00        | 0.000  |      |

## Aceto balsamico (S34):

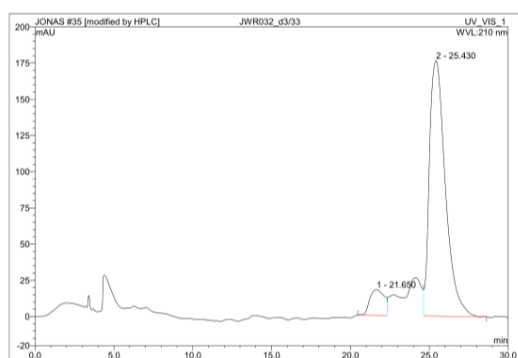

| No.    | Ret.Time<br>min | Peak Name | Height<br>mAU | Area<br>mAU*min | Rel.Area<br>% | Amount | Type |
|--------|-----------------|-----------|---------------|-----------------|---------------|--------|------|
| 1      | 21.65           | n.a.      | 17.721        | 18.636          | 8.23          | n.a.   | BM * |
| 2      | 25.43           | n.a.      | 176.518       | 207.815         | 91.77         | n.a.   | MB*  |
| Total: |                 |           | 194.239       | 226.451         | 100.00        | 0.000  |      |

## Herb vinegar (S35):

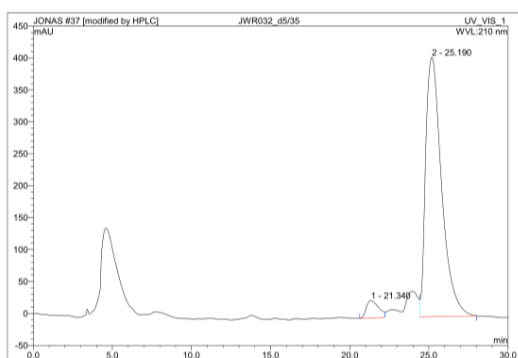

| No.    | Ret.Time<br>min | Peak Name | Height<br>mAU | Area<br>mAU*min | Rel.Area<br>% | Amount | Type |
|--------|-----------------|-----------|---------------|-----------------|---------------|--------|------|
| 1      | 21.34           | n.a.      | 27.153        | 24.680          | 4.93          | n.a.   | BM * |
| 2      | 25.19           | n.a.      | 406.388       | 475.913         | 95.07         | n.a.   | MB*  |
| Total: |                 |           | 433.541       | 500.593         | 100.00        | 0.000  |      |

## Olive oil (S36):

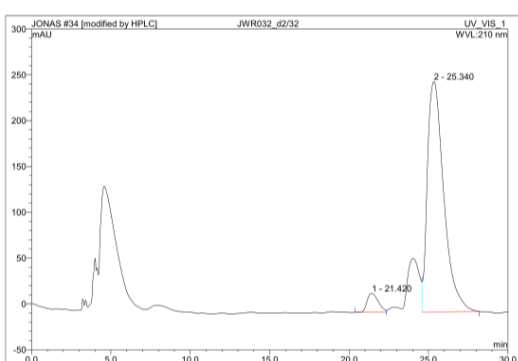

| No.    | Ret.Time<br>min | Peak Name | Height<br>mAU | Area<br>mAU*min | Rel.Area<br>% | Amount | Type |
|--------|-----------------|-----------|---------------|-----------------|---------------|--------|------|
| 1      | 21.42           | n.a.      | 20.477        | 16.950          | 5.33          | n.a.   | BM * |
| 2      | 25.34           | n.a.      | 251.399       | 301.333         | 94.67         | n.a.   | MB*  |
| Total: |                 |           | 271.876       | 318.284         | 100.00        | 0.000  |      |



## **<sup>1</sup>H NMR spectra of the reactions in the presence of H-DPro-MePro-Glu-NH<sub>2</sub> 2:**

A sample of 50  $\mu\text{L}$  from the crude reaction mixture was added to an NMR tube that contained 600  $\mu\text{L}$   $\text{CDCl}_3$ . Vigorous shaking or vortexing ensured extraction of the reaction products from the mixture. Conversion was determined by comparing the integrals of the olefinic signal of nitrostyrene and the  $\text{RCH=O}$  signals of the  $\gamma$ -nitroaldehyde. The diastereomeric ratio was determined by integration of the  $\text{RCH=O}$  signals of the  $\gamma$ -nitroaldehyde.

### **MilliQ water (S1):**

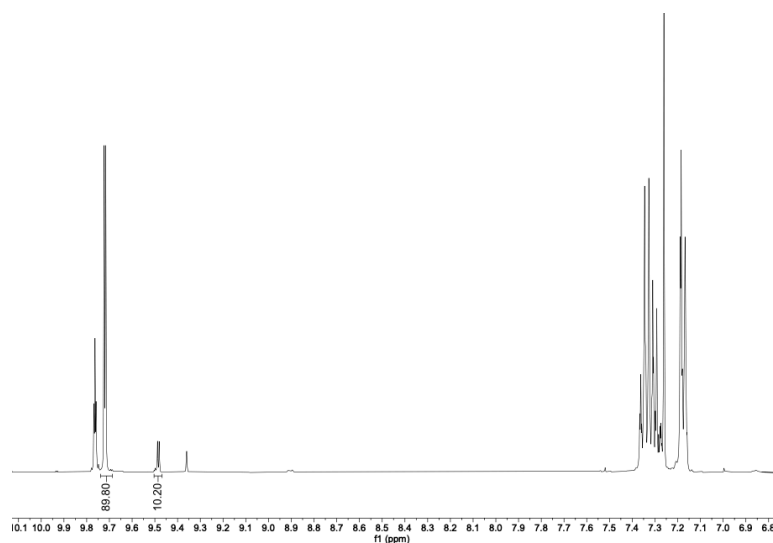

### **Tab water (S2):**

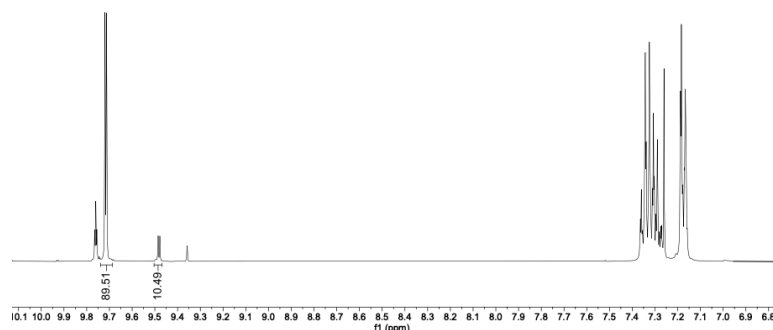

### Lake Zürich water (S3):

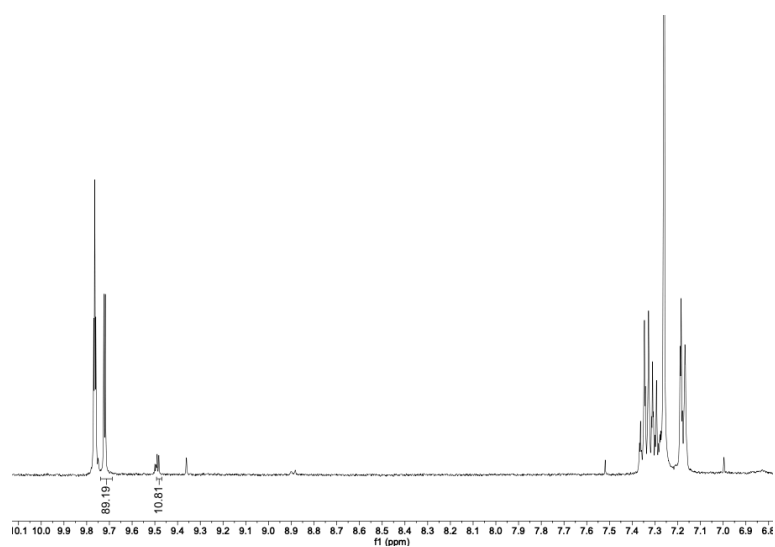

### River Limmat water (S4):

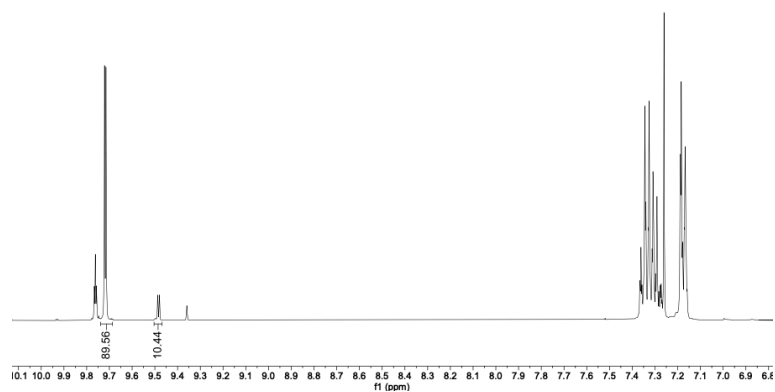

### Milk (S5):

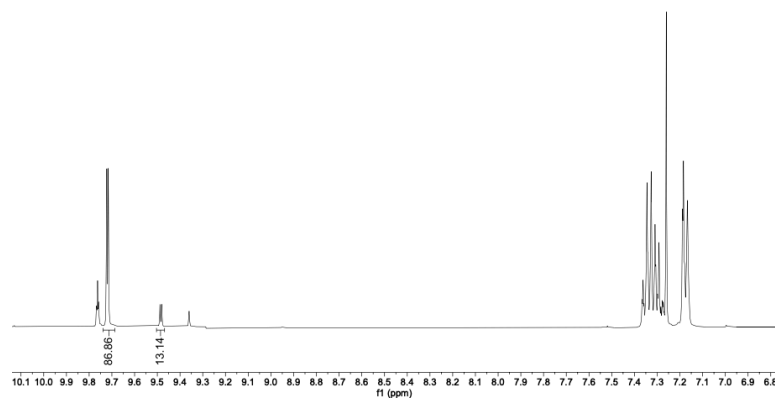

### Low fat milk (S6):

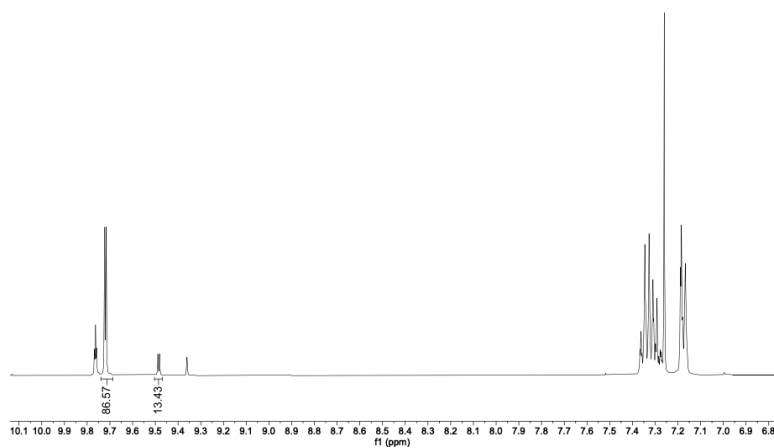

### Soya milk (S7):

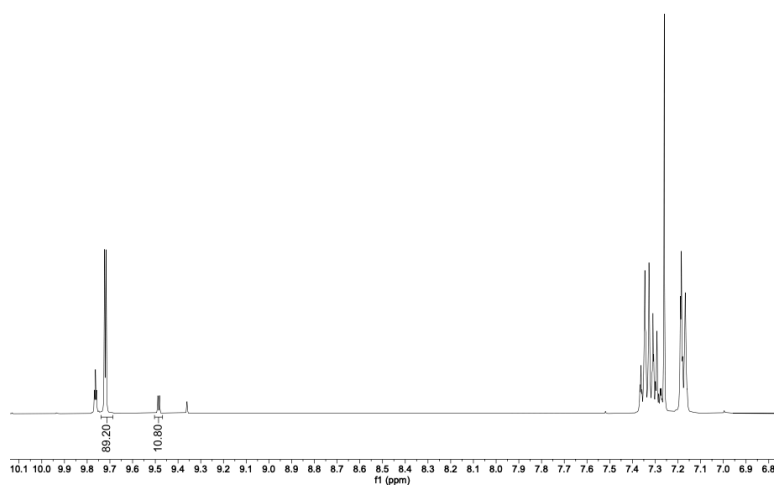

### Almond milk (S8):

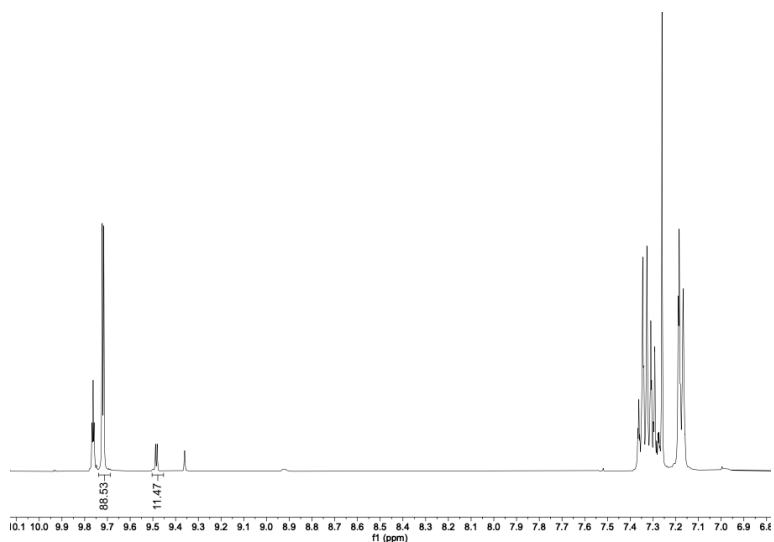

### Rice milk (S9):

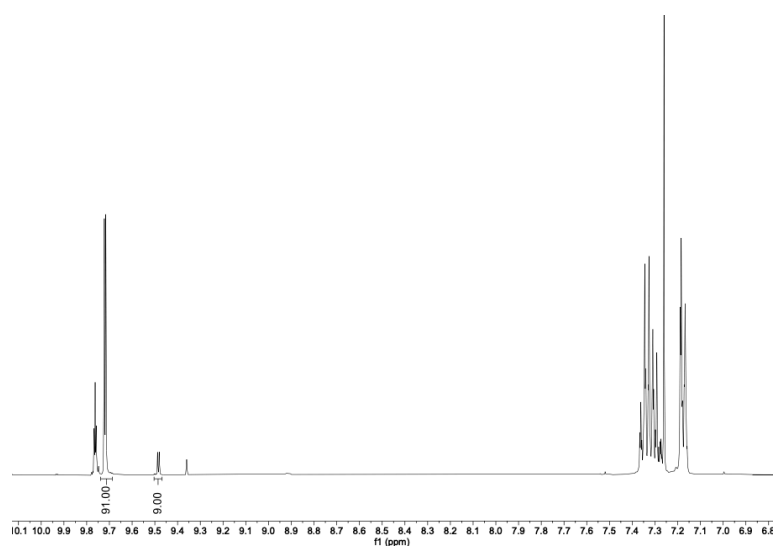

### Orange juice (S10):

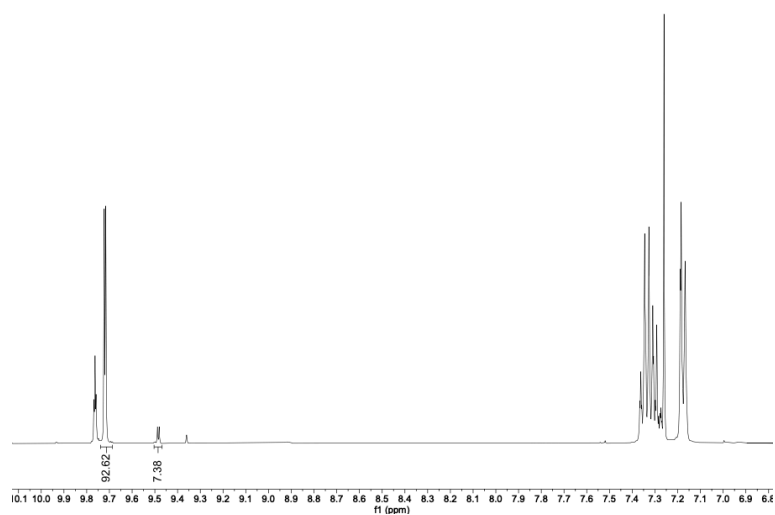

### Blood orange juice (S11):

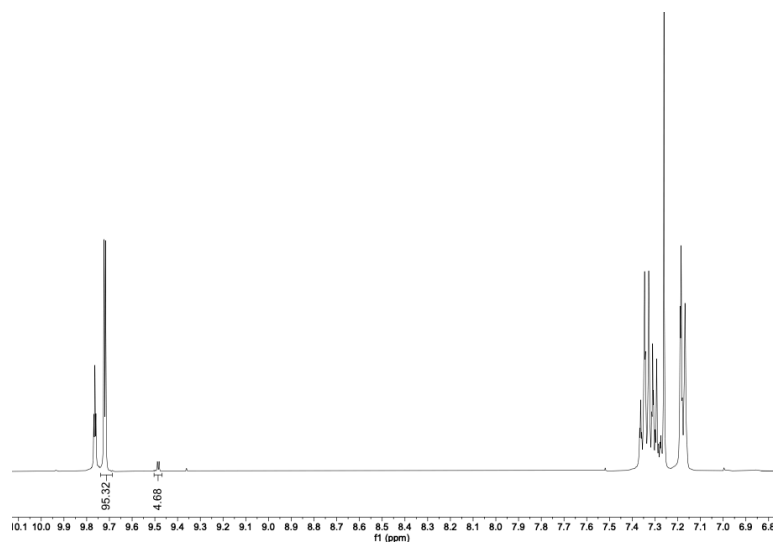

### Apple juice (S12):

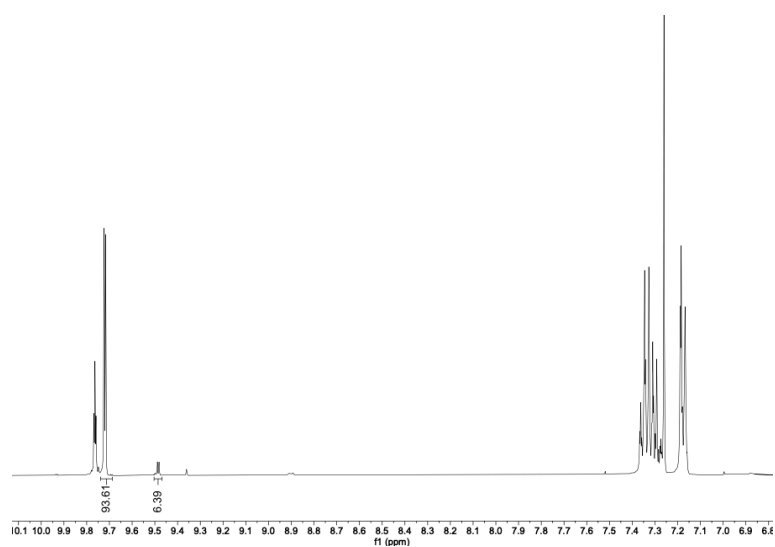

### Coconut water (S13):

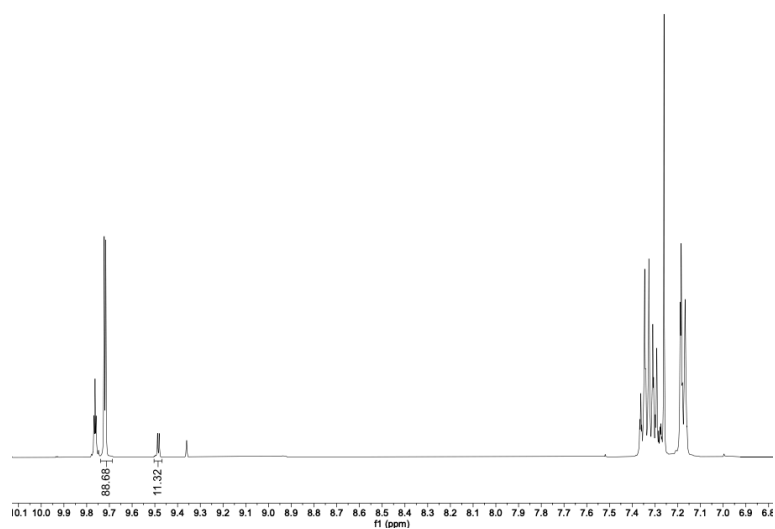

### Carrot juice (S14):

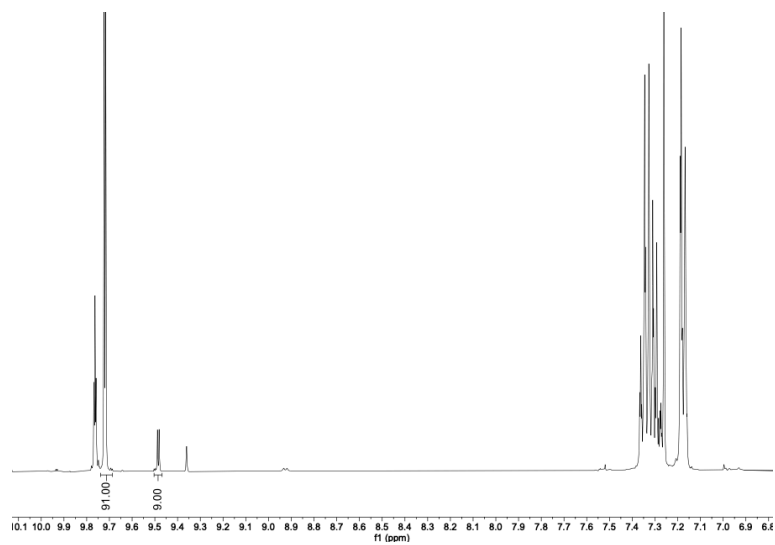

### Beetroot juice (S15):

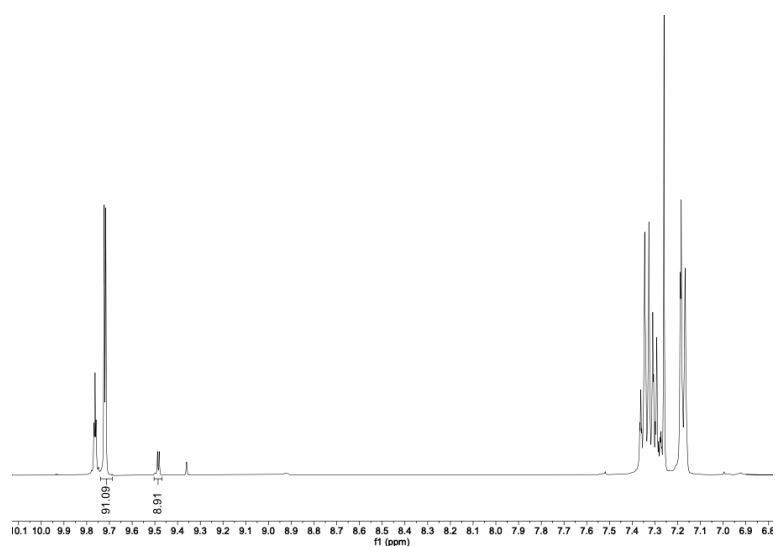

### Coffee (S16):

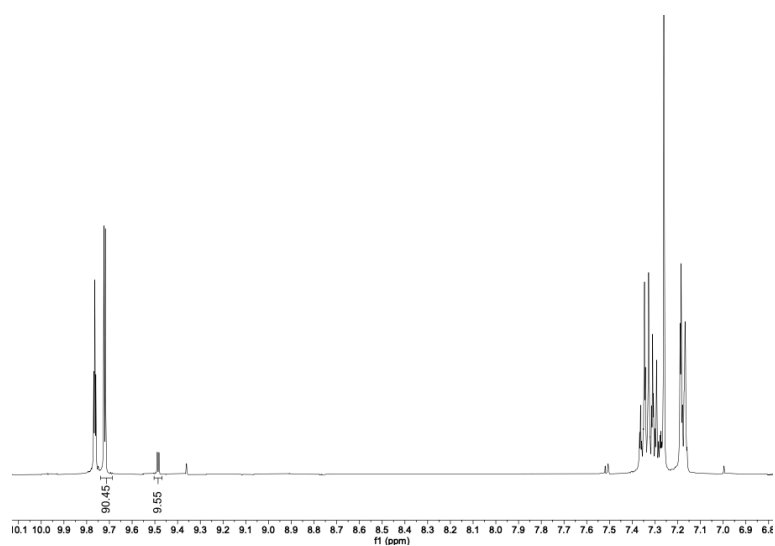

### Green tea (S17):

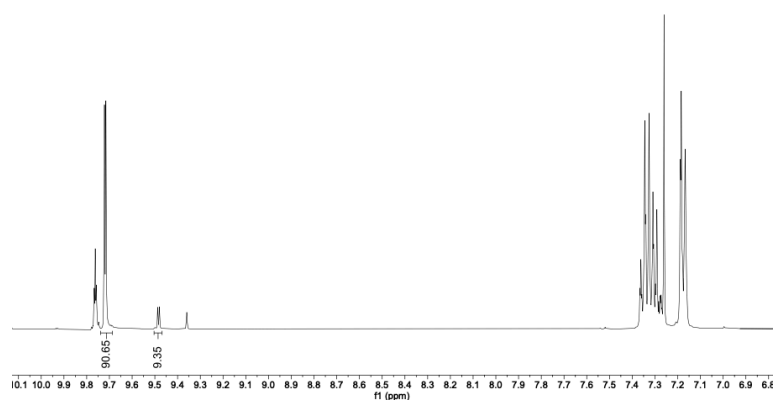

### Black tea (S18):

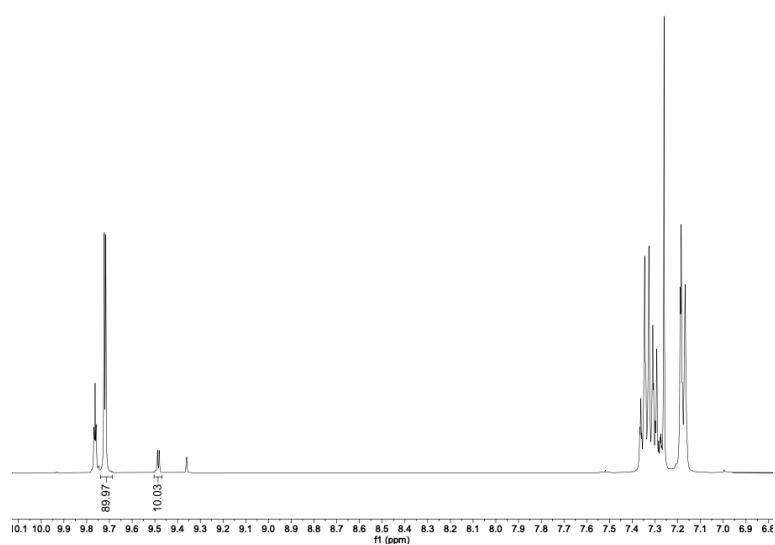

### Peppermint tea (S19):

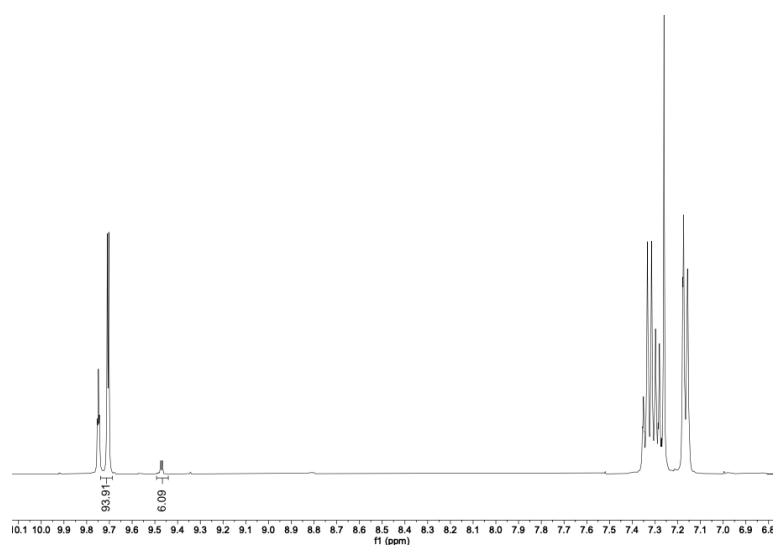

### Fruit tea (S20):

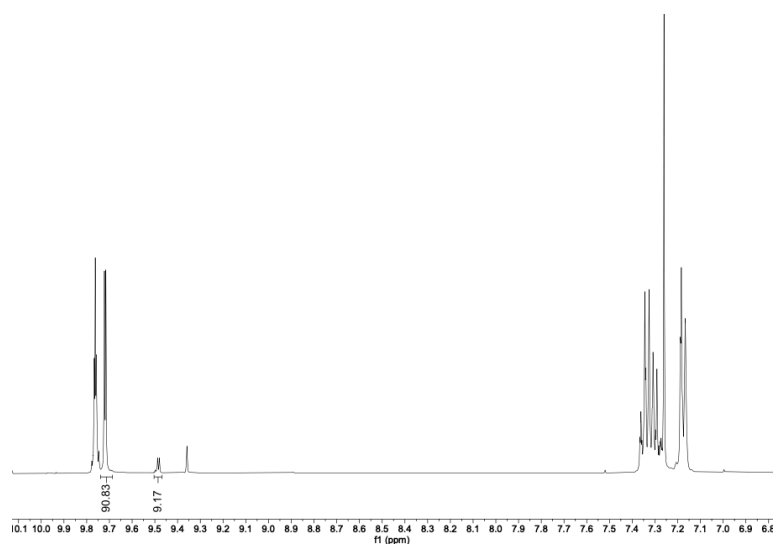

**Honey solution 5 wt% (S21):**

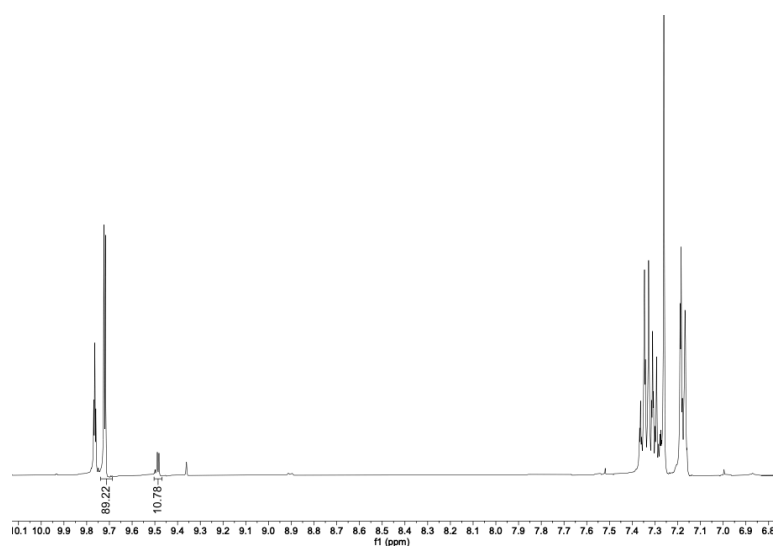

**Coke (S22):**

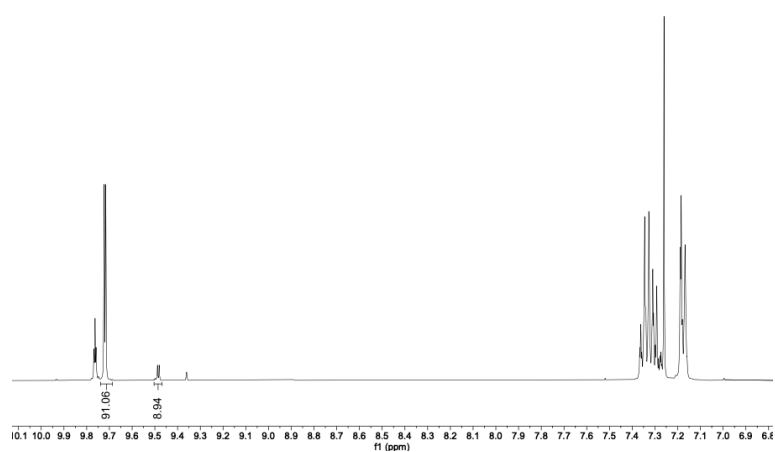

**Rivella (S23):**

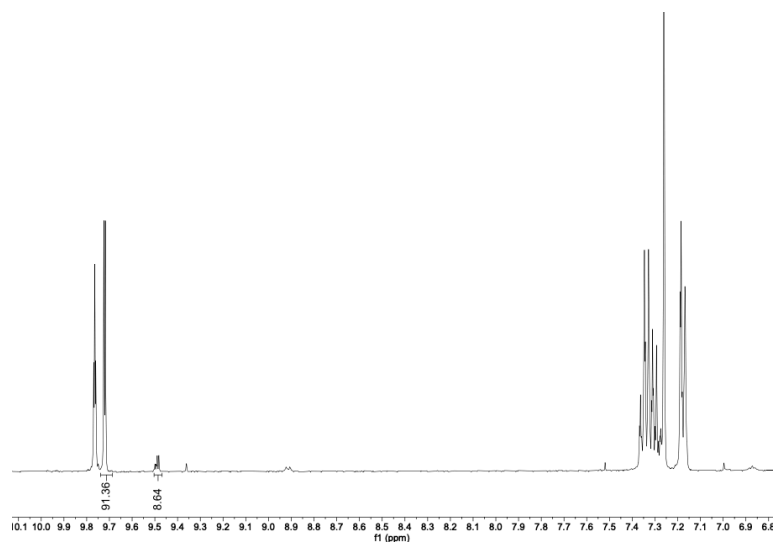



### Diet Rivella (S24):

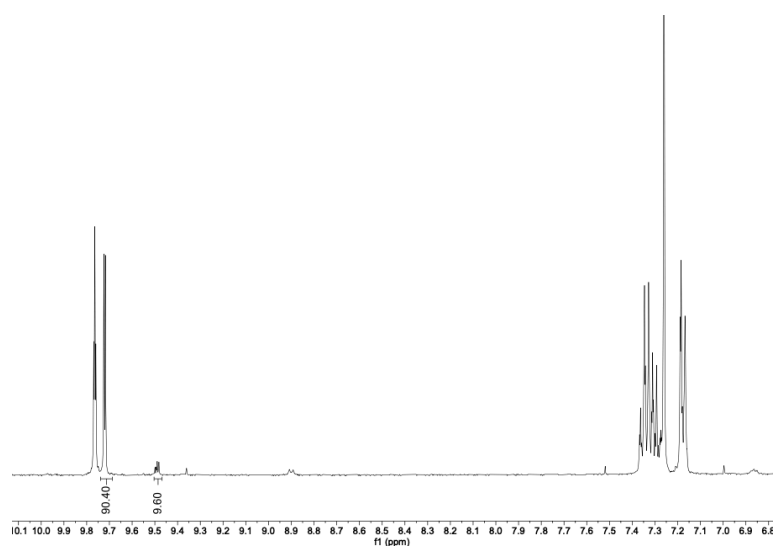

### Ice tea (S25):

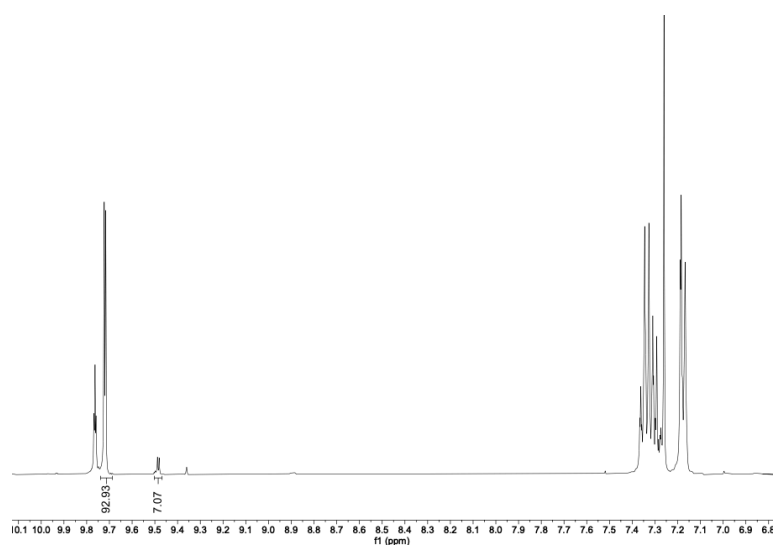

### Beer (S26):

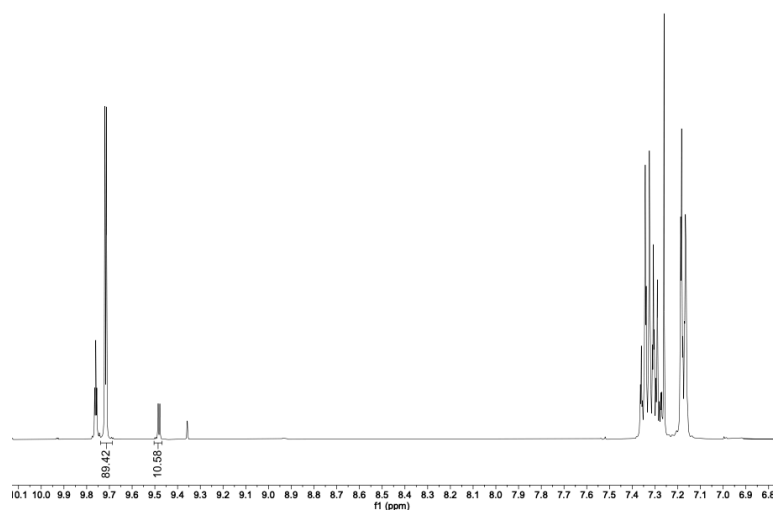

### Red wine (S27):

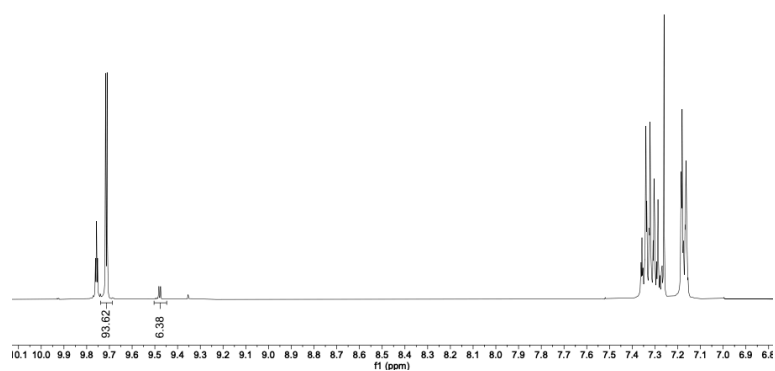

### Amaretto (S28):

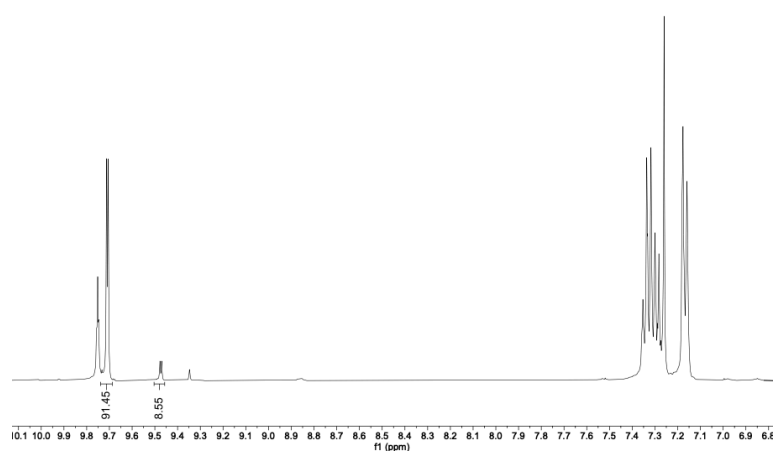

### Herb Liqueur – “Jägermeister” (S29):

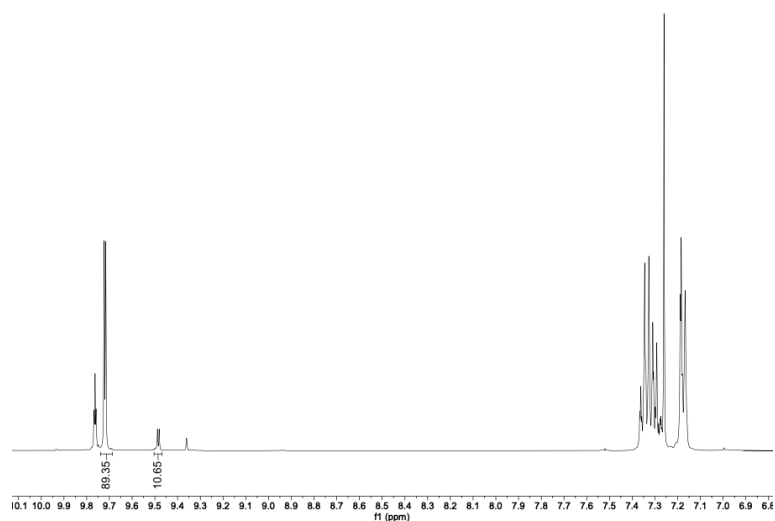

### Scotch Whisky – Aberlour 18 y (S30):

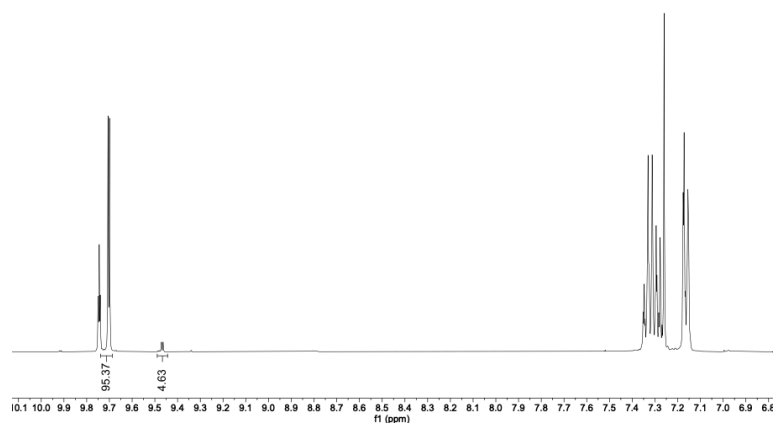

### Vodka (S31):

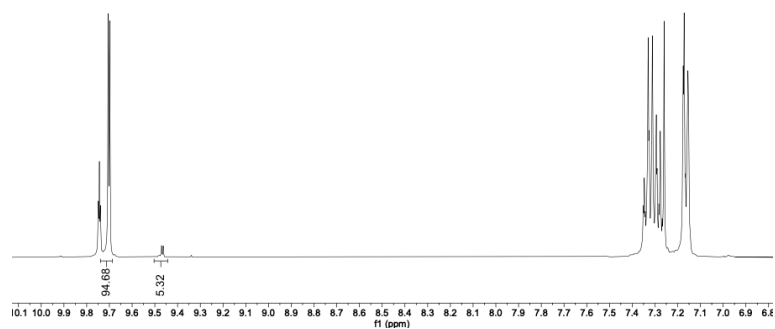

### Gin (S32):

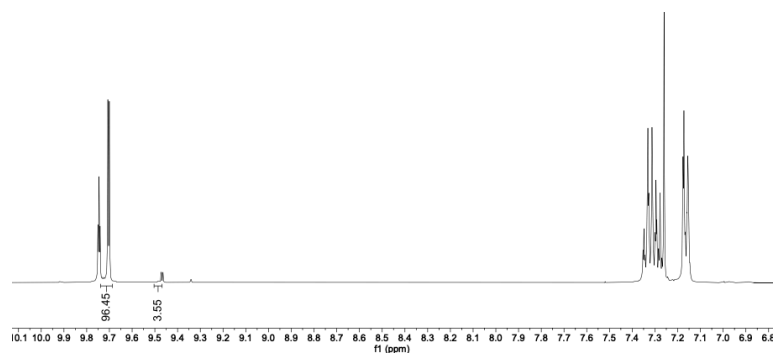

### Rum (S33):

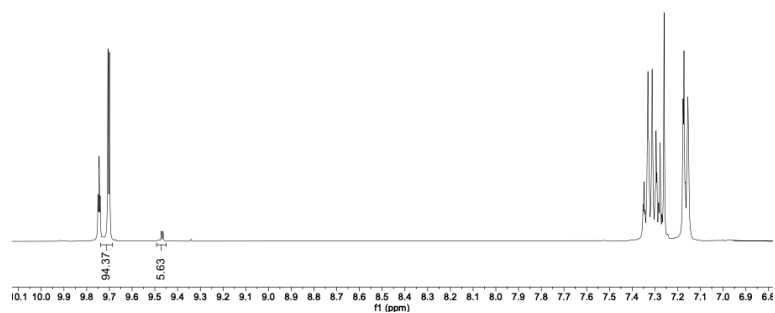

### Aceto balsamico (S34):

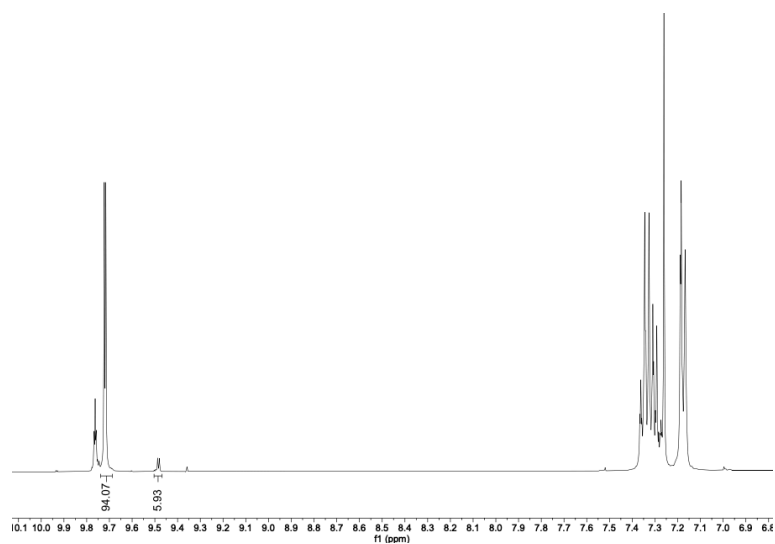

### Herb vinegar (S35):

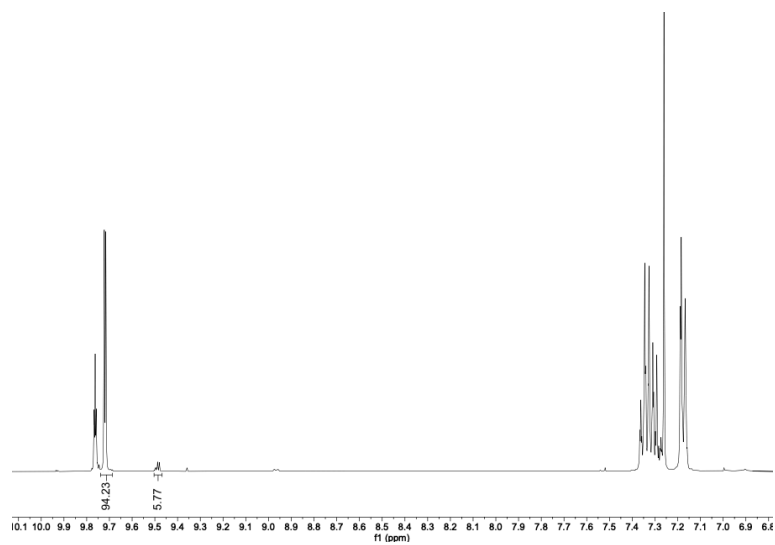

### Olive oil (S36):

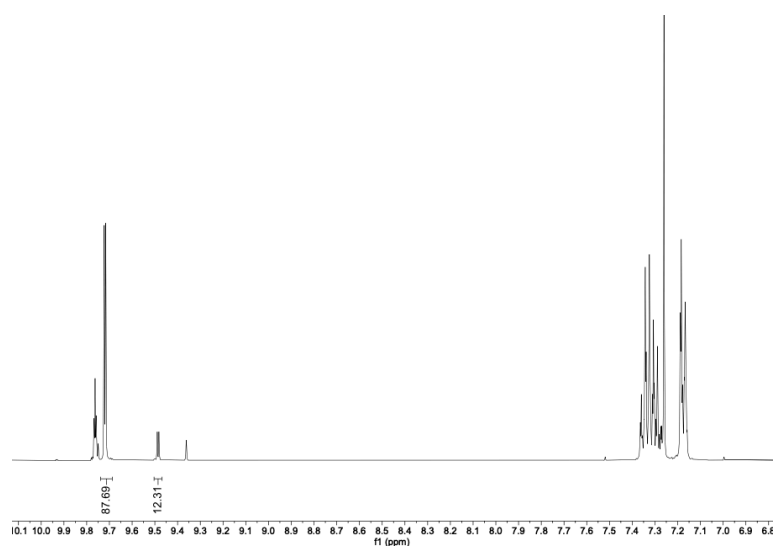

### Control Experiments (Reaction without Catalyst in complex mixtures):

#### MilliQ water (S1):

See ref 1.

#### Tab water (S2):

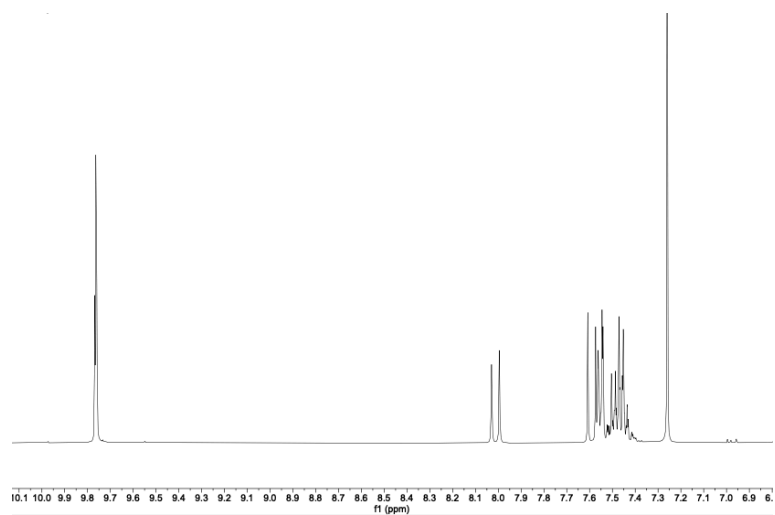

### Lake Zürich water (S3):

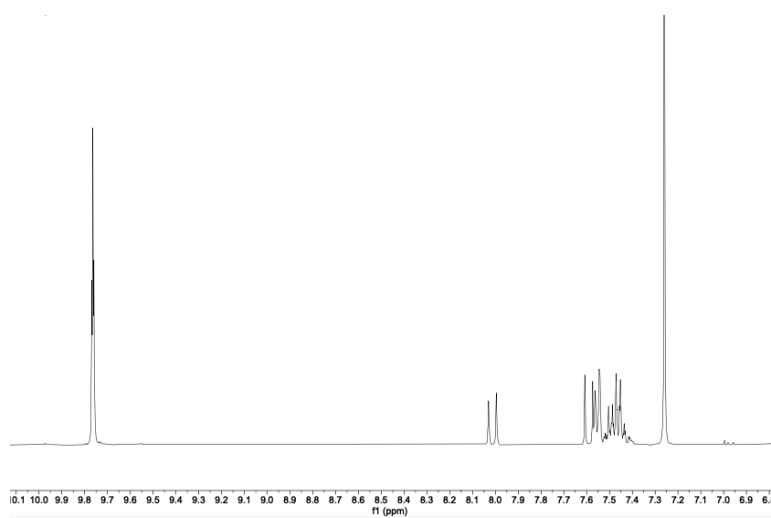

### River Limmat water (S4):

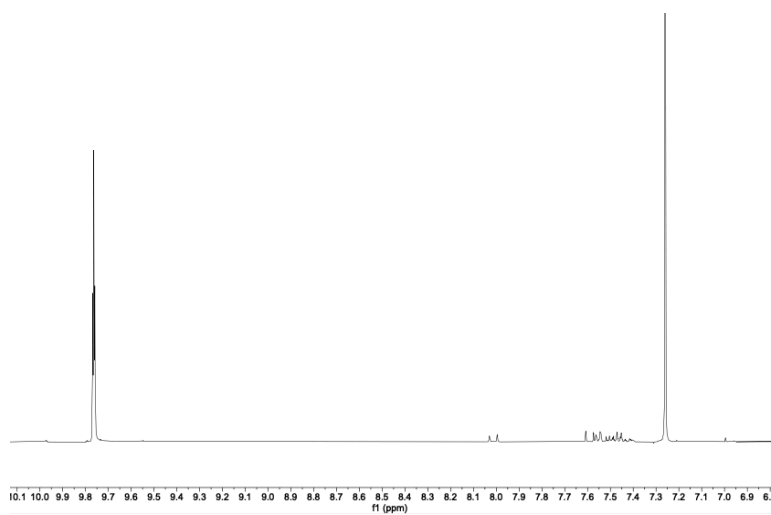

### Milk (S5):

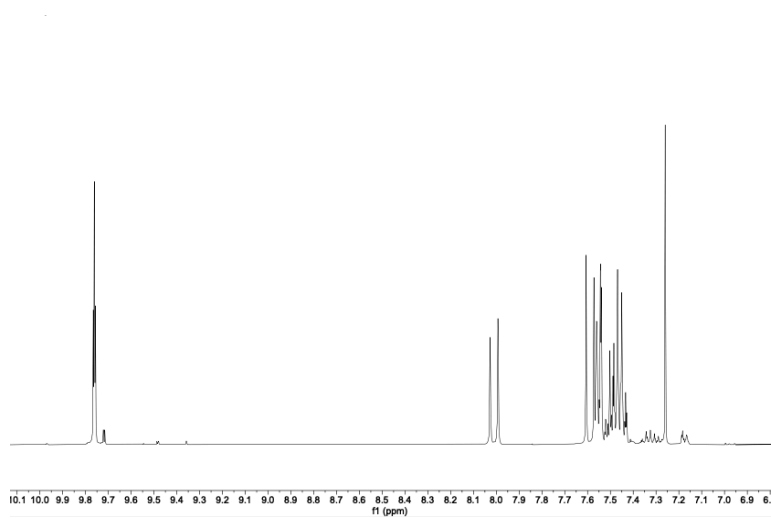

### Low fat milk (S6):

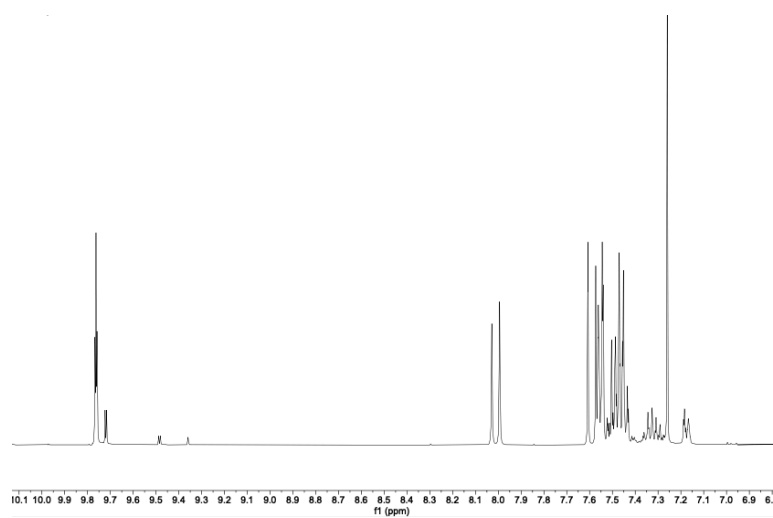

### Soya milk (S7):

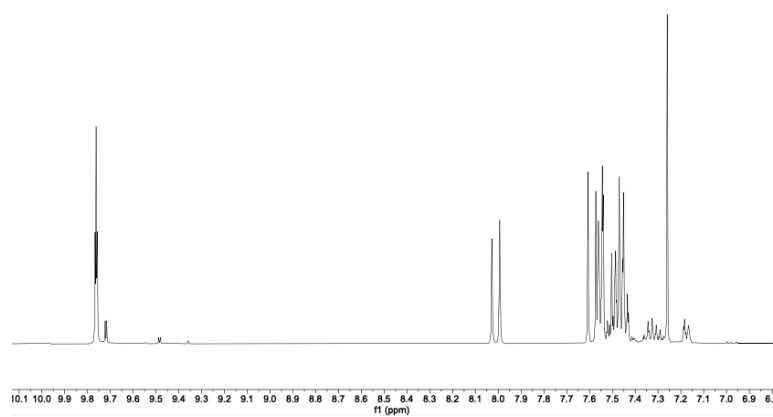

### Almond milk (S8):

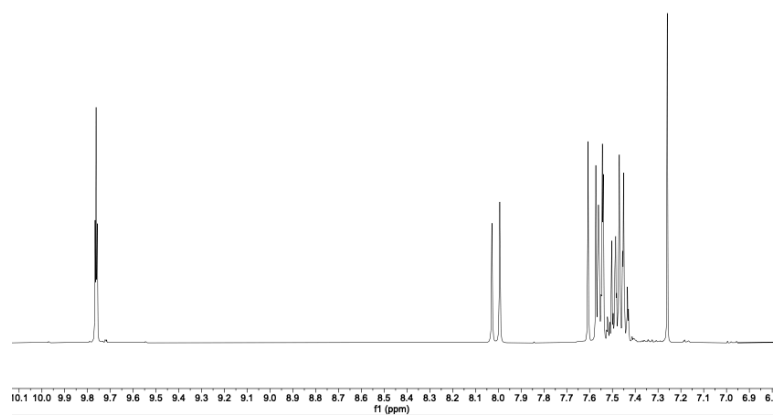

**Rice milk (S9):**

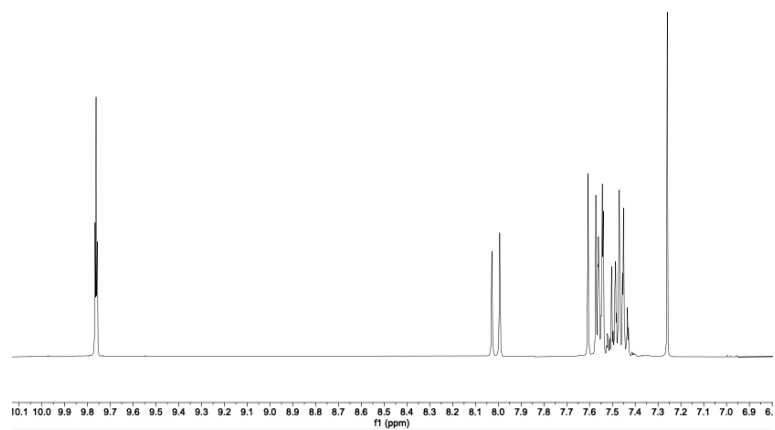

**Orange juice (S10):**

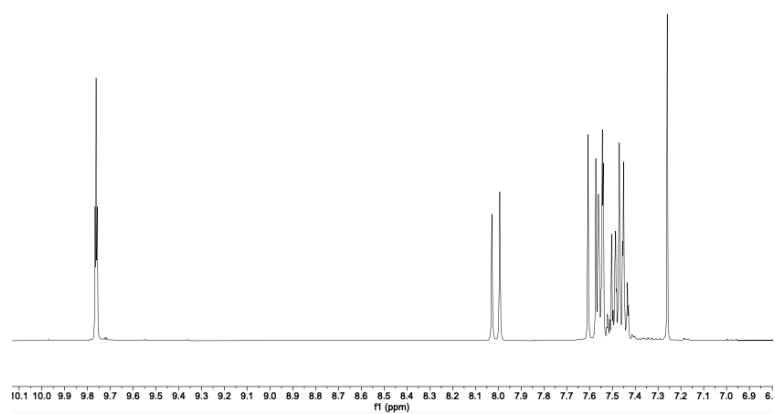

**Blood orange juice (S11):**

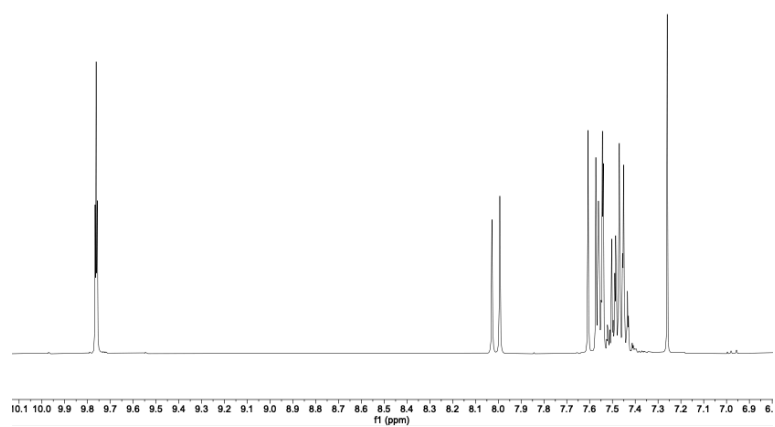



**Apple juice (S12):**

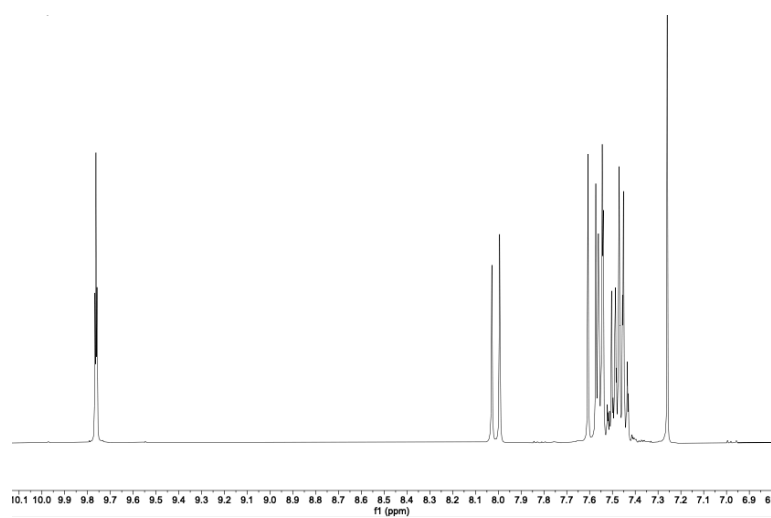

**Coconut water (S13):**

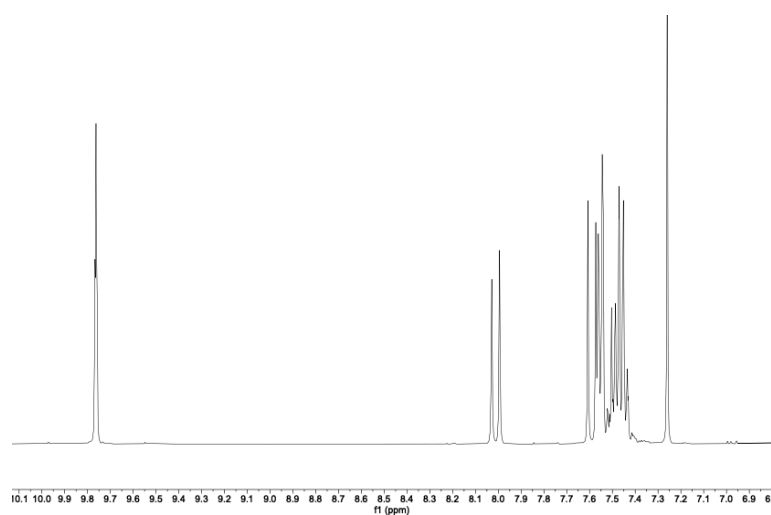

**Carrot juice (S14):**

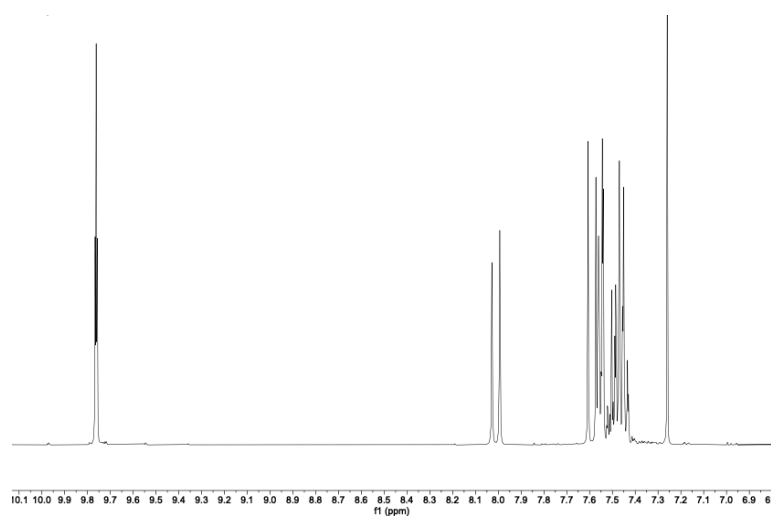

### Beetroot juice (S15):

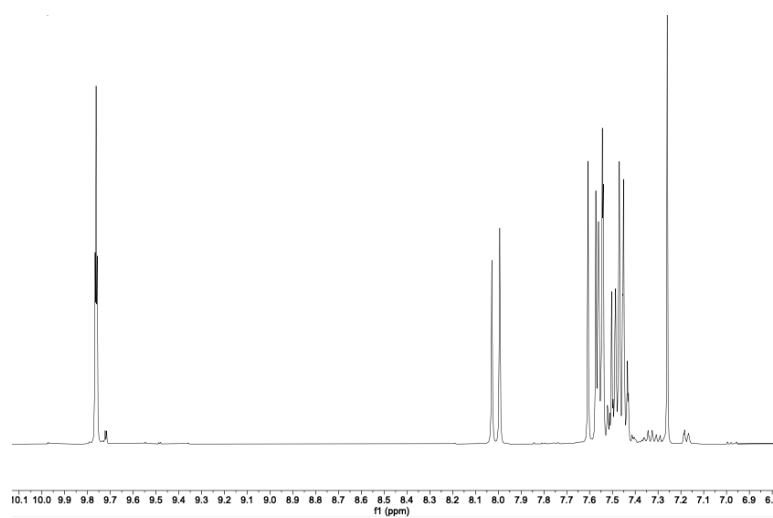

### Coffee (S16):

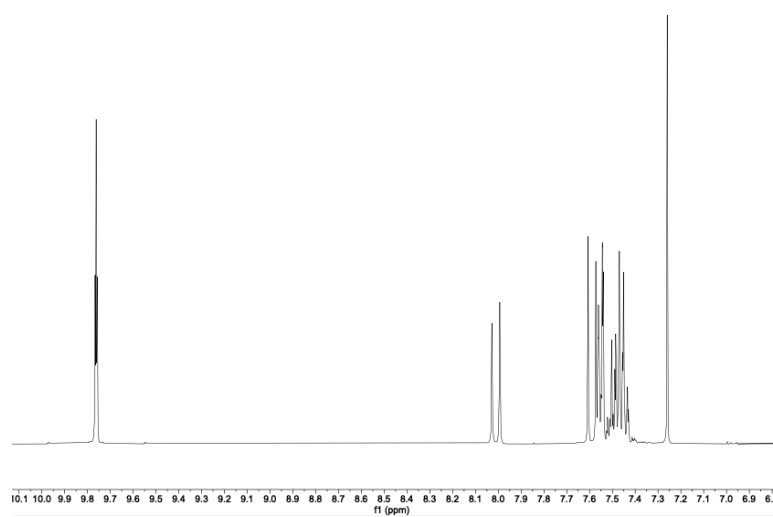

### Green tea (S17):

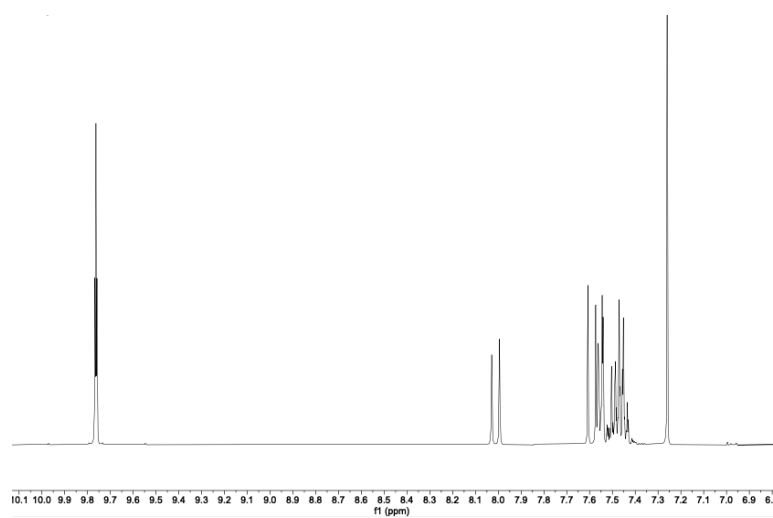

**Black tea (S18):**

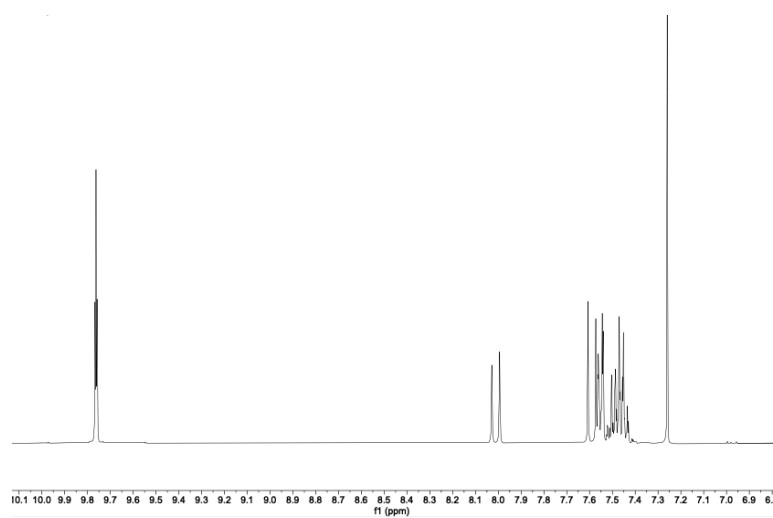

**Peppermint tea (S19):**

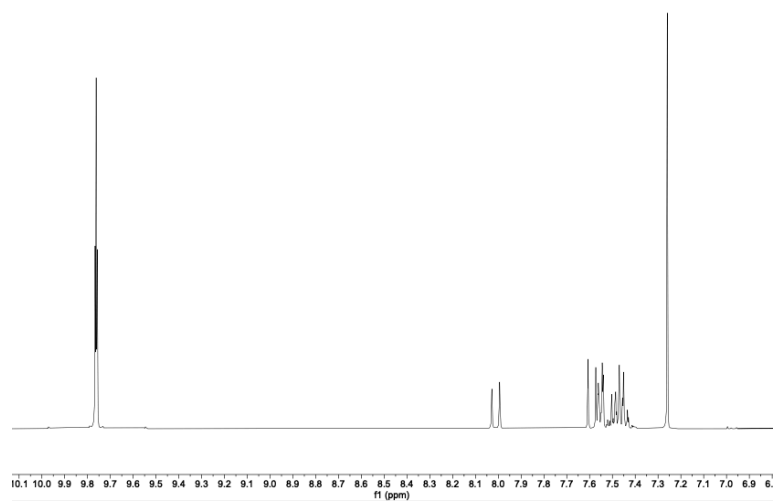

**Fruit tea (S20):**

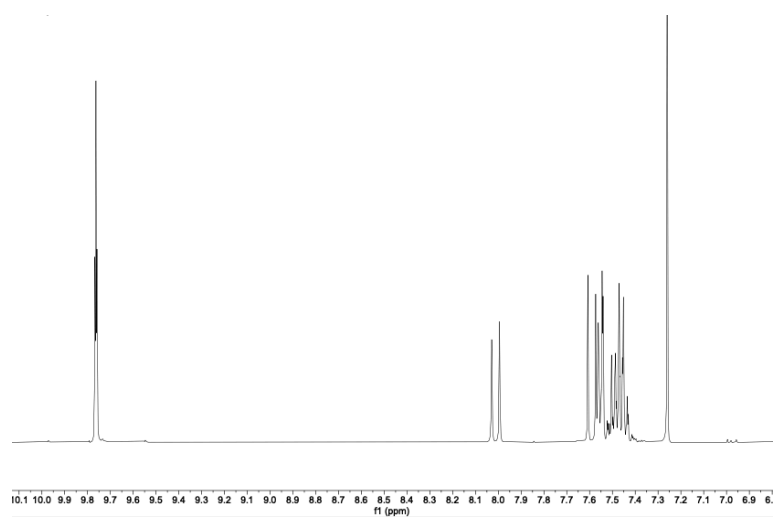

**Honey solution 5 wt% (S21):**

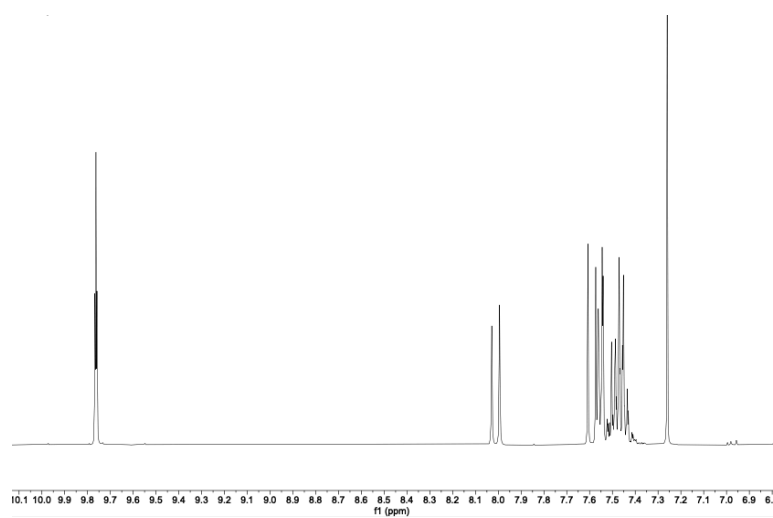

**Coke (S22):**

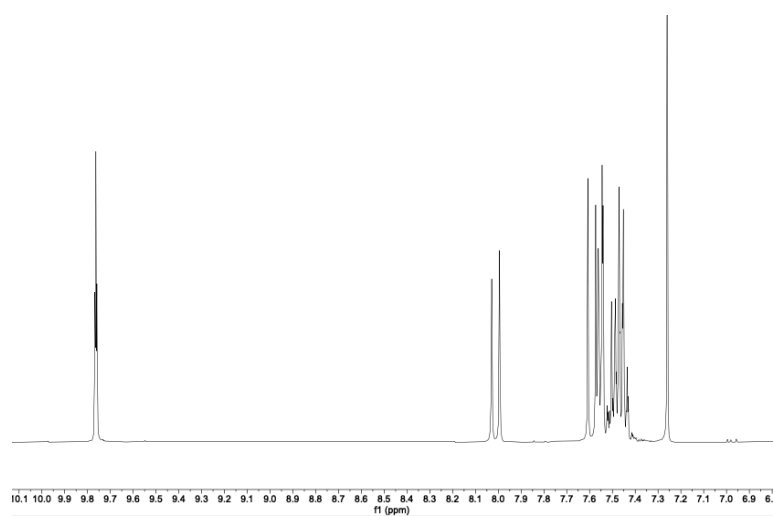

**Rivella (S23):**

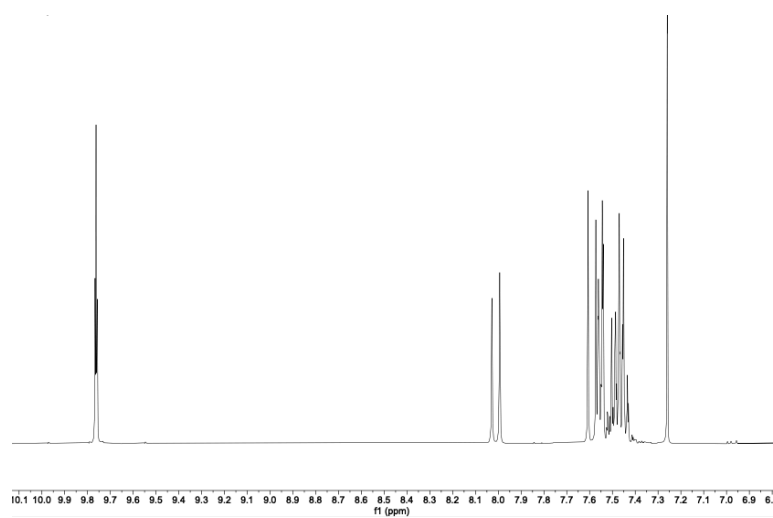

### Diet Rivella (S24):

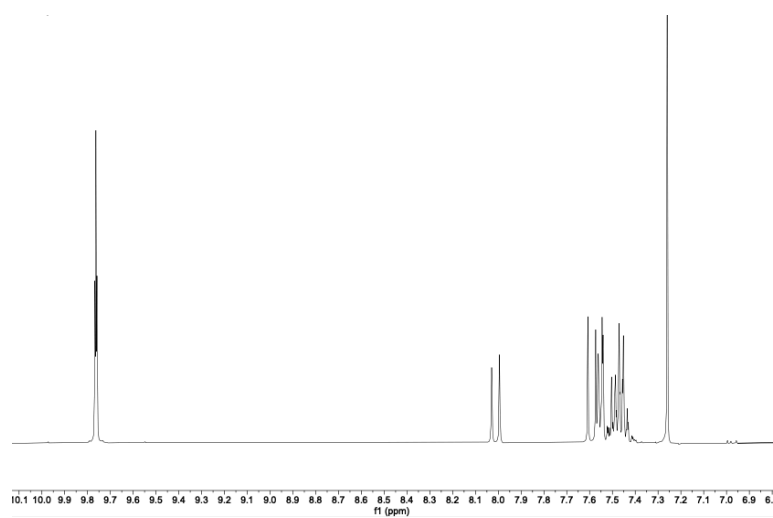

### Ice tea (S25):

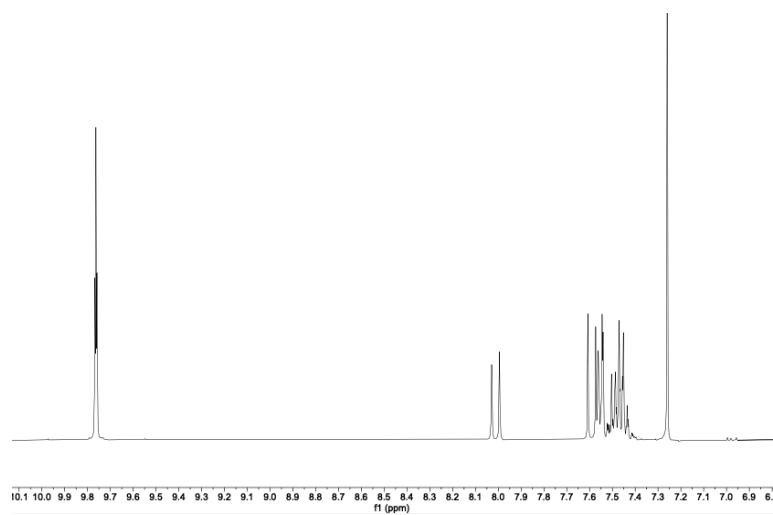

### Beer (S26):

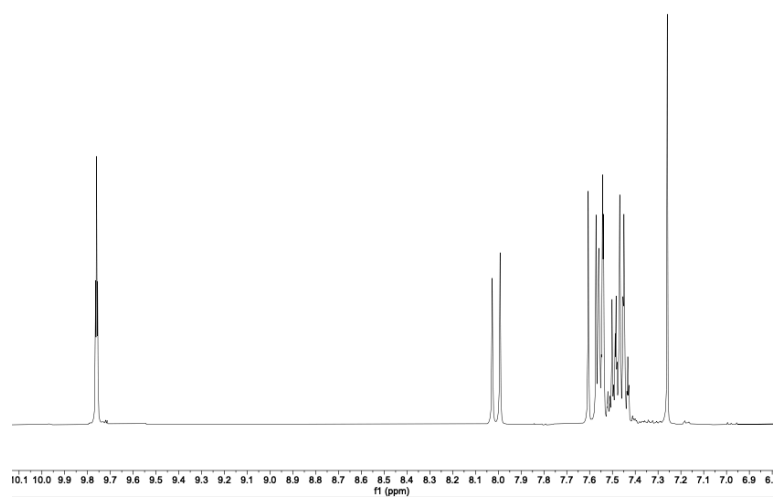

**Red wine (S27):**

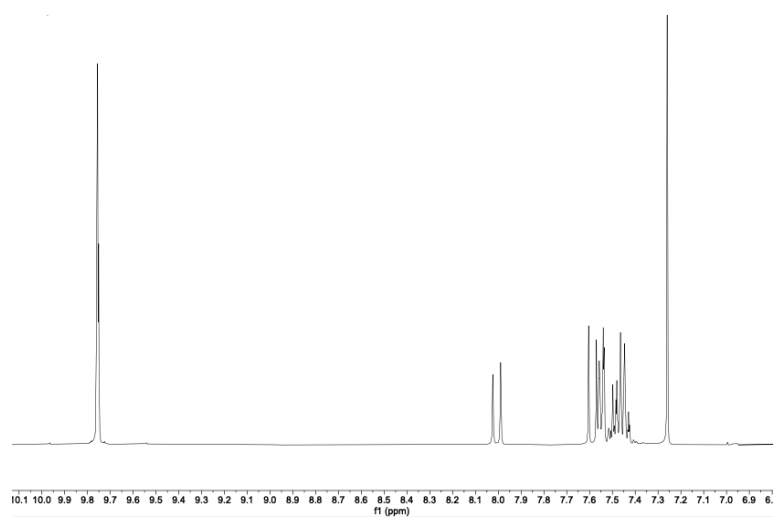

**Amaretto (S28):**

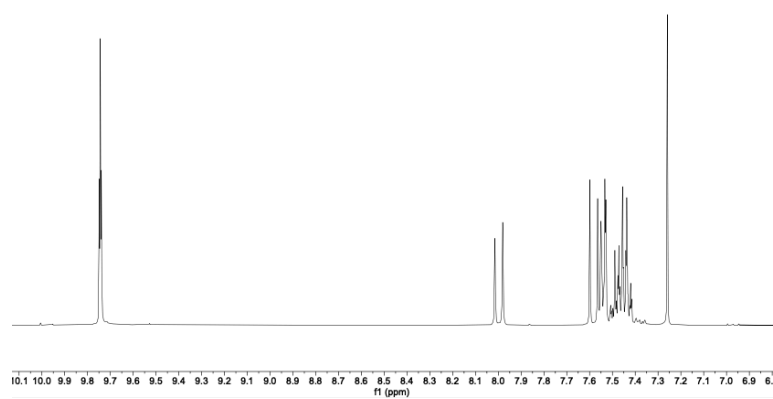

**Herb Liqueur – “Jägermeister” (S29):**

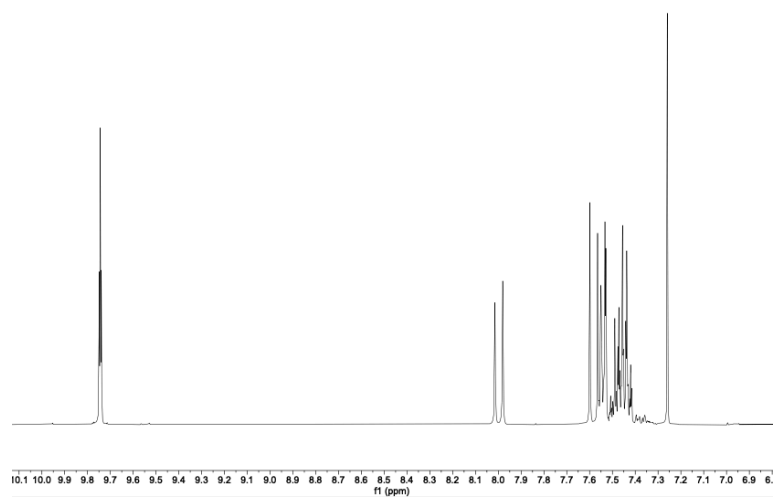

**Scotch Whisky – Aberlour 18 y (S30):**

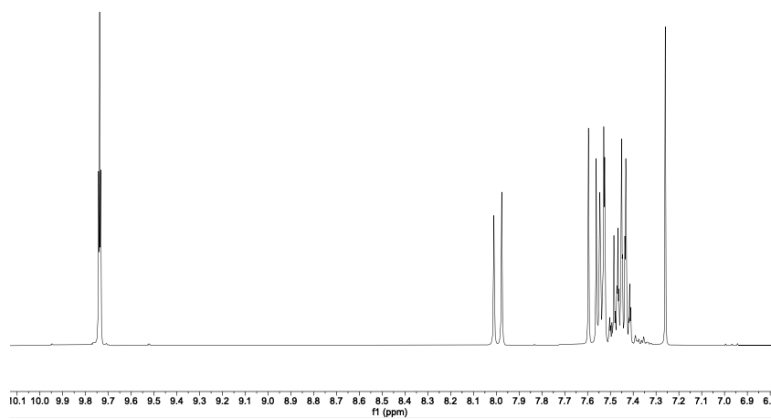

**Vodka (S31):**

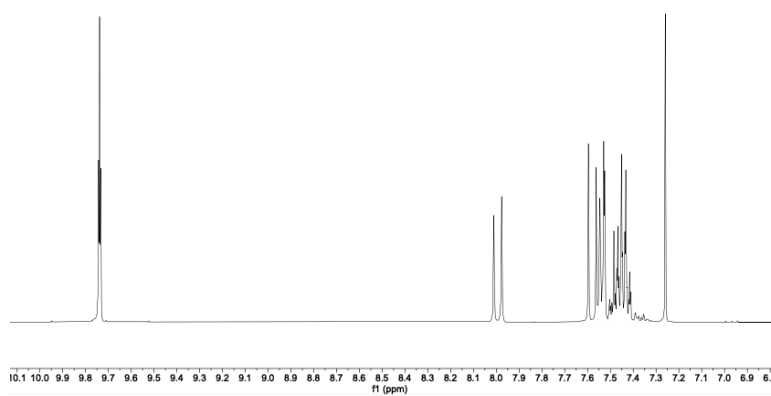

**Gin (S32):**

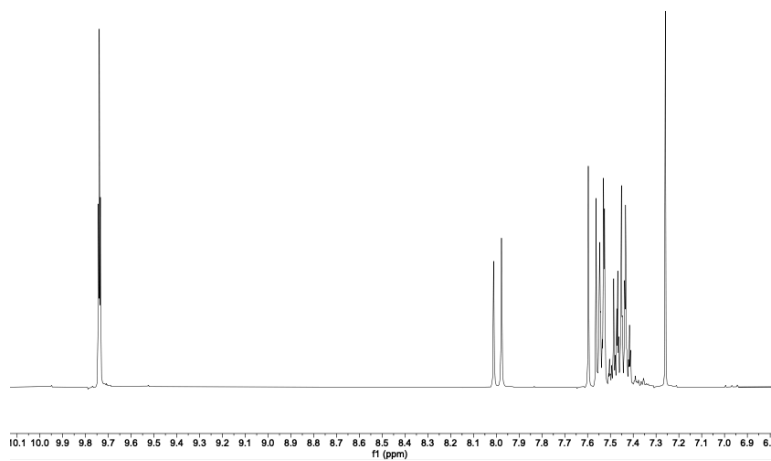

### Rum (S33):

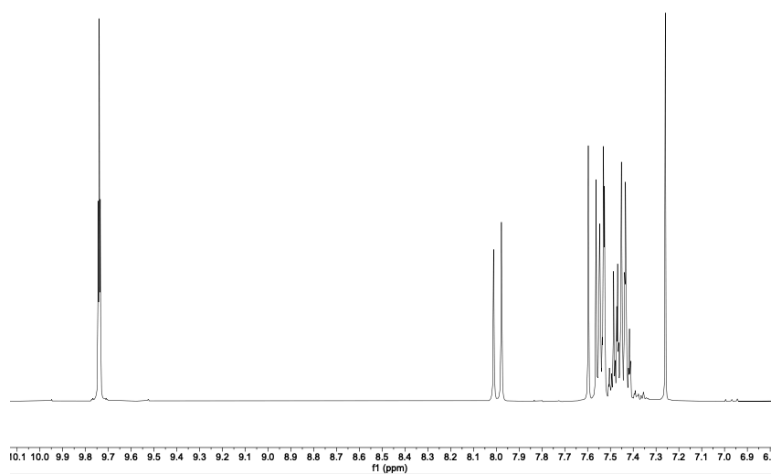

### Aceto balsamico (S34):

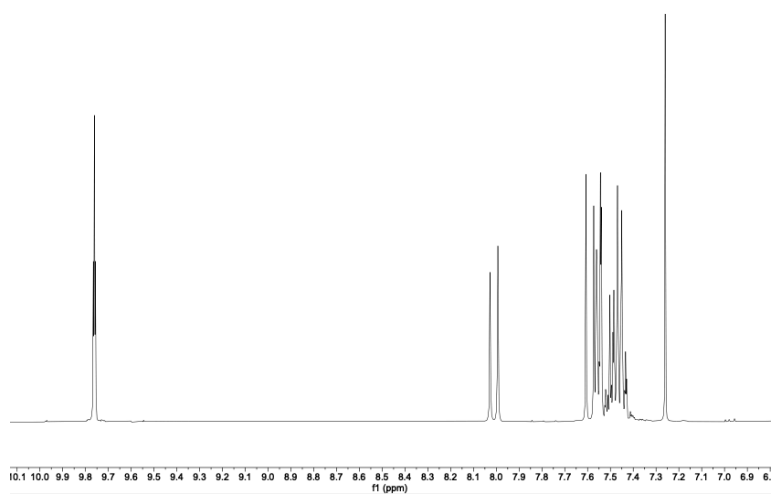

### Herb vinegar (S35):

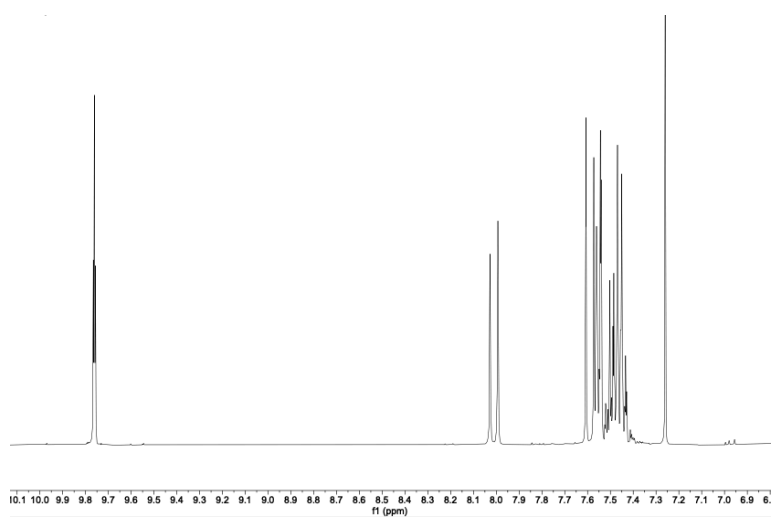



**Olive oil (S36):**

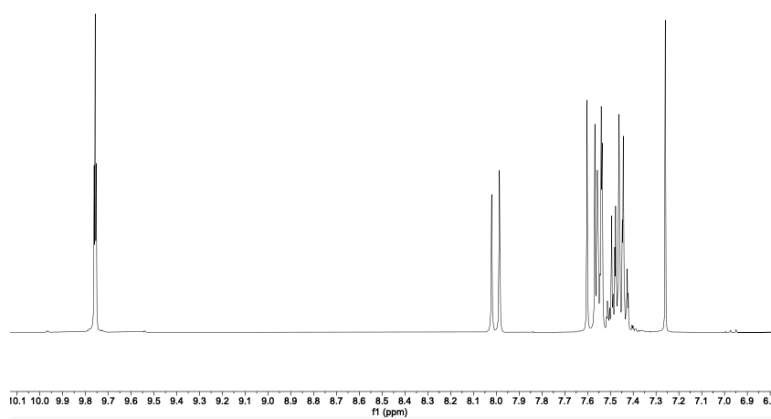

## HPLC chromatograms of the reactions in the presence of H-DPro-MePro-Glu-NH<sub>2</sub> 2:

### MilliQ water (S1):

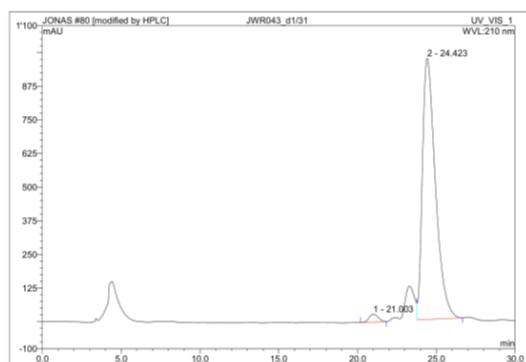

| No.    | Ret.Time<br>min | Peak Name | Height<br>mAU | Area<br>mAU*min | Rel.Area<br>% | Amount | Type |
|--------|-----------------|-----------|---------------|-----------------|---------------|--------|------|
| 1      | 21.00           | n.a.      | 29.210        | 19.385          | 2.05          | n.a.   | BMb* |
| 2      | 24.42           | n.a.      | 970.010       | 927.759         | 97.95         | n.a.   | MB*  |
| Total: |                 |           | 999.220       | 947.144         | 100.00        | 0.000  |      |

### Tab water (S2):

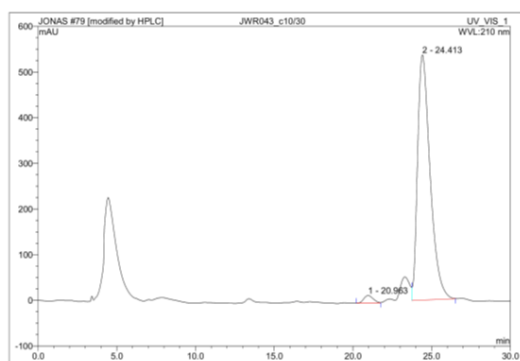

| No.    | Ret.Time<br>min | Peak Name | Height<br>mAU | Area<br>mAU*min | Rel.Area<br>% | Amount | Type |
|--------|-----------------|-----------|---------------|-----------------|---------------|--------|------|
| 1      | 20.96           | n.a.      | 16.378        | 11.290          | 2.23          | n.a.   | BM * |
| 2      | 24.41           | n.a.      | 536.467       | 495.298         | 97.77         | n.a.   | MB*  |
| Total: |                 |           | 552.845       | 506.588         | 100.00        | 0.000  |      |

### Lake Zürich water (S3):

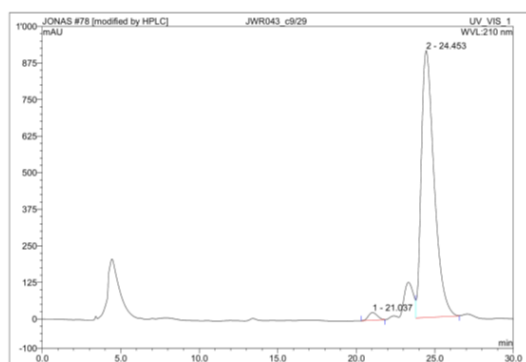

| No.    | Ret.Time<br>min | Peak Name | Height<br>mAU | Area<br>mAU*min | Rel.Area<br>% | Amount | Type |
|--------|-----------------|-----------|---------------|-----------------|---------------|--------|------|
| 1      | 21.04           | n.a.      | 25.973        | 16.668          | 1.89          | n.a.   | BM * |
| 2      | 24.45           | n.a.      | 911.933       | 864.343         | 98.11         | n.a.   | MB*  |
| Total: |                 |           | 937.905       | 881.011         | 100.00        | 0.000  |      |

## River Limmat water (S4):

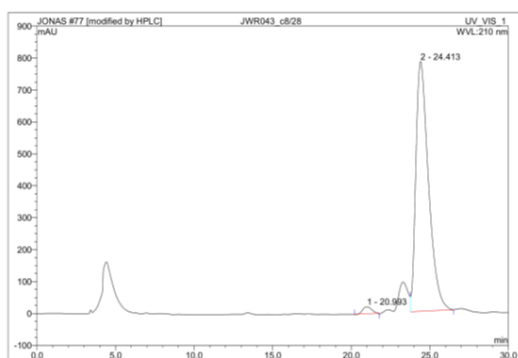

| No.    | Ret.Time<br>min | Peak Name | Height<br>mAU | Area<br>mAU*min | Rel.Area<br>% | Amount | Type |
|--------|-----------------|-----------|---------------|-----------------|---------------|--------|------|
| 1      | 20.99           | n.a.      | 21.947        | 14.071          | 1.89          | n.a.   | BM * |
| 2      | 24.41           | n.a.      | 782.243       | 729.215         | 98.11         | n.a.   | MB*  |
| Total: |                 |           | 804.191       | 743.286         | 100.00        | 0.000  |      |

## Milk (S5):

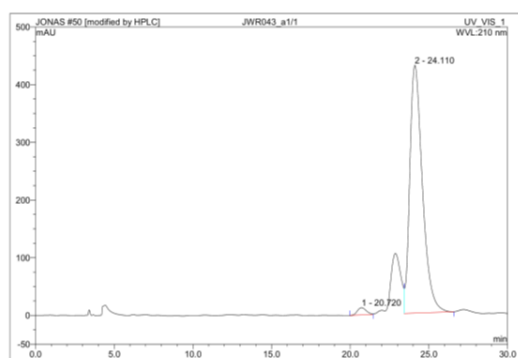

| No.    | Ret.Time<br>min | Peak Name | Height<br>mAU | Area<br>mAU*min | Rel.Area<br>% | Amount | Type |
|--------|-----------------|-----------|---------------|-----------------|---------------|--------|------|
| 1      | 20.72           | n.a.      | 12.654        | 8.399           | 2.06          | n.a.   | BM * |
| 2      | 24.11           | n.a.      | 429.742       | 400.276         | 97.94         | n.a.   | MB*  |
| Total: |                 |           | 442.397       | 408.675         | 100.00        | 0.000  |      |

## Low fat milk (S6):

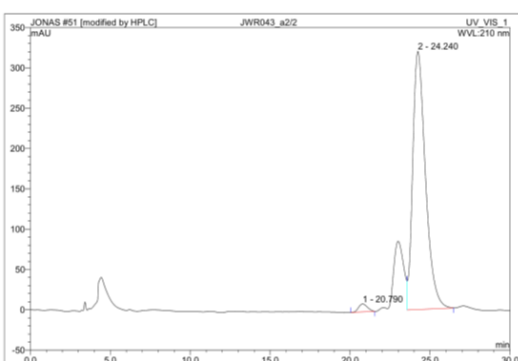

| No.    | Ret.Time<br>min | Peak Name | Height<br>mAU | Area<br>mAU*min | Rel.Area<br>% | Amount | Type |
|--------|-----------------|-----------|---------------|-----------------|---------------|--------|------|
| 1      | 20.79           | n.a.      | 9.737         | 6.217           | 2.05          | n.a.   | BM * |
| 2      | 24.24           | n.a.      | 320.170       | 296.910         | 97.95         | n.a.   | MB*  |
| Total: |                 |           | 329.906       | 303.127         | 100.00        | 0.000  |      |

## Soya milk (S7):

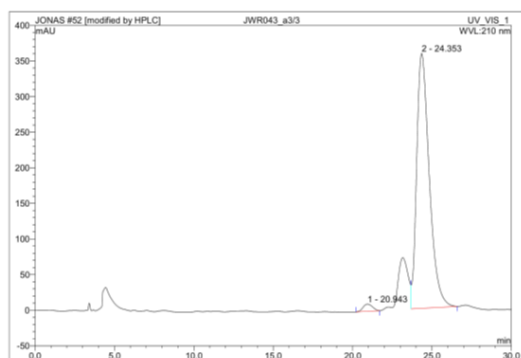

| No.    | Ret.Time<br>min | Peak Name | Height<br>mAU | Area<br>mAU*min | Rel.Area<br>% | Amount | Type |
|--------|-----------------|-----------|---------------|-----------------|---------------|--------|------|
| 1      | 20.94           | n.a.      | 10.075        | 6.822           | 2.03          | n.a.   | BM * |
| 2      | 24.35           | n.a.      | 357.946       | 329.730         | 97.97         | n.a.   | MB*  |
| Total: |                 |           | 368.021       | 336.552         | 100.00        | 0.000  |      |

## Almond milk (S8):

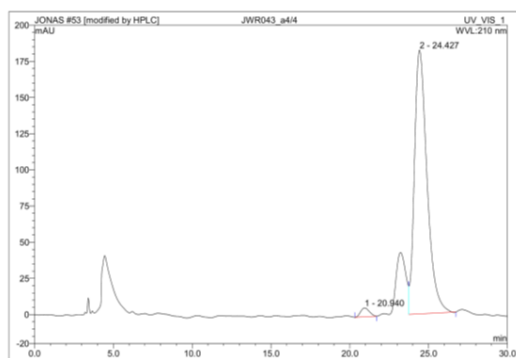

| No.    | Ret.Time<br>min | Peak Name | Height<br>mAU | Area<br>mAU*min | Rel.Area<br>% | Amount | Type |
|--------|-----------------|-----------|---------------|-----------------|---------------|--------|------|
| 1      | 20.94           | n.a.      | 6.085         | 3.852           | 2.23          | n.a.   | BM * |
| 2      | 24.43           | n.a.      | 182.319       | 169.099         | 97.77         | n.a.   | MB*  |
| Total: |                 |           | 188.404       | 172.951         | 100.00        | 0.000  |      |

## Rice milk (S9):

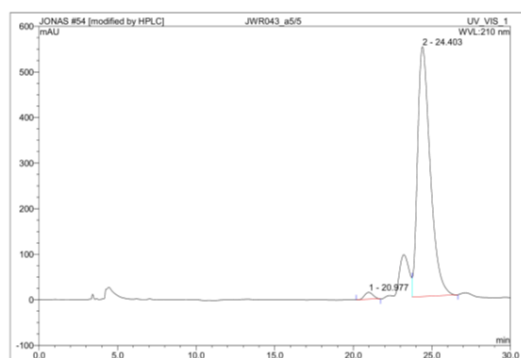

| No.    | Ret.Time<br>min | Peak Name | Height<br>mAU | Area<br>mAU*min | Rel.Area<br>% | Amount | Type |
|--------|-----------------|-----------|---------------|-----------------|---------------|--------|------|
| 1      | 20.98           | n.a.      | 14.830        | 9.099           | 1.75          | n.a.   | BM * |
| 2      | 24.40           | n.a.      | 547.501       | 511.252         | 98.25         | n.a.   | MB*  |
| Total: |                 |           | 562.331       | 520.351         | 100.00        | 0.000  |      |

## Orange juice (S10):

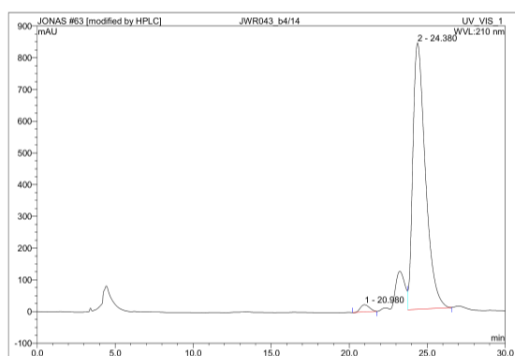

| No.    | Ret.Time<br>min | Peak Name | Height<br>mAU | Area<br>mAU*min | Rel.Area<br>% | Amount | Type |
|--------|-----------------|-----------|---------------|-----------------|---------------|--------|------|
| 1      | 20.98           | n.a.      | 22.640        | 15.048          | 1.89          | n.a.   | BM * |
| 2      | 24.38           | n.a.      | 839.987       | 782.223         | 98.11         | n.a.   | MB*  |
| Total: |                 |           | 862.627       | 797.271         | 100.00        | 0.000  |      |

## Blood orange juice (S11):

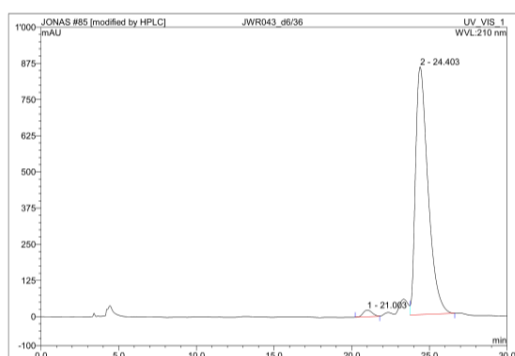

| No.    | Ret.Time<br>min | Peak Name | Height<br>mAU | Area<br>mAU*min | Rel.Area<br>% | Amount | Type |
|--------|-----------------|-----------|---------------|-----------------|---------------|--------|------|
| 1      | 21.00           | n.a.      | 23.124        | 15.466          | 1.90          | n.a.   | BM * |
| 2      | 24.40           | n.a.      | 856.129       | 799.582         | 98.10         | n.a.   | MB*  |
| Total: |                 |           | 879.253       | 815.049         | 100.00        | 0.000  |      |

## Apple juice (S12):

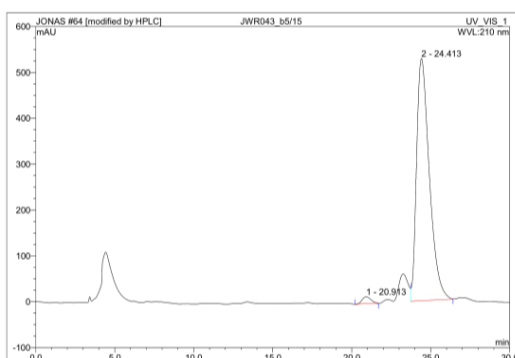

| No.    | Ret.Time<br>min | Peak Name | Height<br>mAU | Area<br>mAU*min | Rel.Area<br>% | Amount | Type |
|--------|-----------------|-----------|---------------|-----------------|---------------|--------|------|
| 1      | 20.91           | n.a.      | 14.801        | 9.042           | 1.79          | n.a.   | BM * |
| 2      | 24.41           | n.a.      | 527.873       | 495.119         | 98.21         | n.a.   | MB*  |
| Total: |                 |           | 542.674       | 504.160         | 100.00        | 0.000  |      |

## Coconut water (S13):

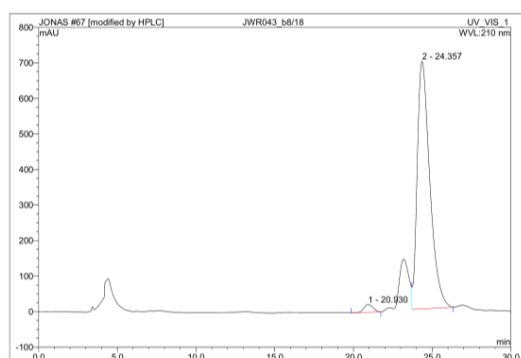

| No.    | Ret.Time<br>min | Peak Name | Height<br>mAU | Area<br>mAU*min | Rel.Area<br>% | Amount | Type |
|--------|-----------------|-----------|---------------|-----------------|---------------|--------|------|
| 1      | 20.93           | n.a.      | 21.620        | 14.532          | 2.20          | n.a.   | BMb* |
| 2      | 24.36           | n.a.      | 696.821       | 645.004         | 97.80         | n.a.   | MB*  |
| Total: |                 |           | 718.442       | 659.536         | 100.00        | 0.000  |      |

## Carrot juice (S14):

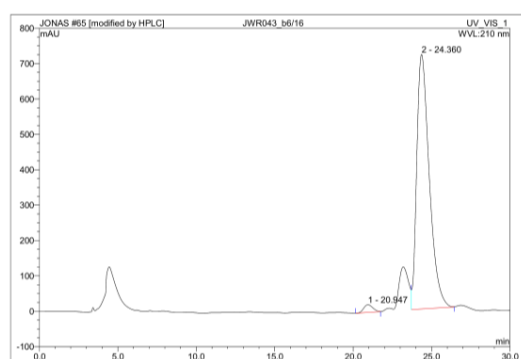

| No.    | Ret.Time<br>min | Peak Name | Height<br>mAU | Area<br>mAU*min | Rel.Area<br>% | Amount | Type |
|--------|-----------------|-----------|---------------|-----------------|---------------|--------|------|
| 1      | 20.95           | n.a.      | 21.606        | 14.331          | 2.10          | n.a.   | BM * |
| 2      | 24.36           | n.a.      | 719.542       | 667.189         | 97.90         | n.a.   | MB*  |
| Total: |                 |           | 741.148       | 681.520         | 100.00        | 0.000  |      |

## Beetroot juice (S15):

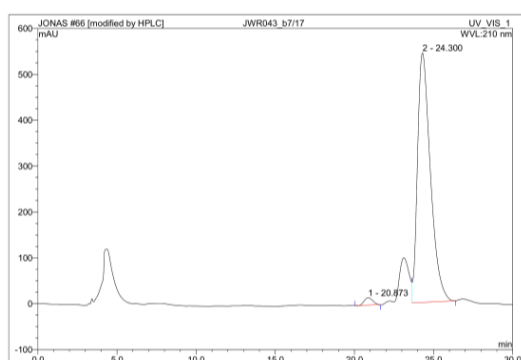

| No.    | Ret.Time<br>min | Peak Name | Height<br>mAU | Area<br>mAU*min | Rel.Area<br>% | Amount | Type |
|--------|-----------------|-----------|---------------|-----------------|---------------|--------|------|
| 1      | 20.87           | n.a.      | 15.857        | 9.741           | 1.86          | n.a.   | BM * |
| 2      | 24.30           | n.a.      | 543.804       | 513.048         | 98.14         | n.a.   | MB*  |
| Total: |                 |           | 559.661       | 522.789         | 100.00        | 0.000  |      |

## Coffee (S16):

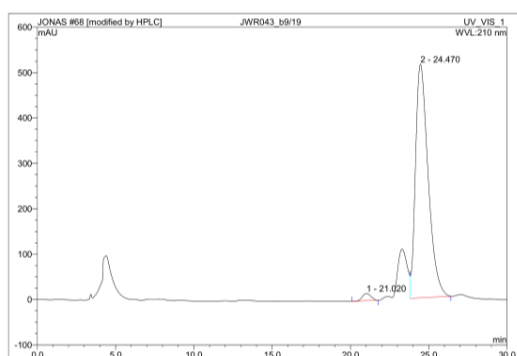

| No.    | Ret.Time<br>min | Peak Name | Height<br>mAU | Area<br>mAU*min | Rel.Area<br>% | Amount | Type |
|--------|-----------------|-----------|---------------|-----------------|---------------|--------|------|
| 1      | 21.02           | n.a.      | 15.732        | 9.719           | 1.98          | n.a.   | BM * |
| 2      | 24.47           | n.a.      | 514.141       | 480.802         | 98.02         | n.a.   | MB*  |
| Total: |                 |           | 529.873       | 490.521         | 100.00        | 0.000  |      |

## Green tea (S17):

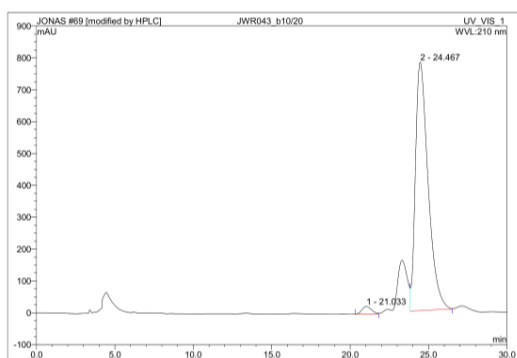

| No.    | Ret.Time<br>min | Peak Name | Height<br>mAU | Area<br>mAU*min | Rel.Area<br>% | Amount | Type |
|--------|-----------------|-----------|---------------|-----------------|---------------|--------|------|
| 1      | 21.03           | n.a.      | 23.191        | 16.494          | 2.21          | n.a.   | BM * |
| 2      | 24.47           | n.a.      | 779.537       | 731.374         | 97.79         | n.a.   | MB*  |
| Total: |                 |           | 802.729       | 747.869         | 100.00        | 0.000  |      |

## Black tea (S18):

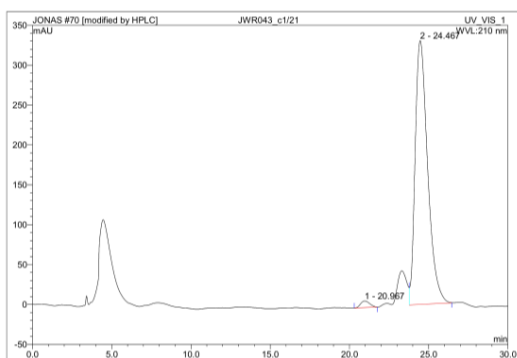

| No.    | Ret.Time<br>min | Peak Name | Height<br>mAU | Area<br>mAU*min | Rel.Area<br>% | Amount | Type |
|--------|-----------------|-----------|---------------|-----------------|---------------|--------|------|
| 1      | 20.97           | n.a.      | 8.321         | 5.478           | 1.78          | n.a.   | BMb* |
| 2      | 24.47           | n.a.      | 330.712       | 302.249         | 98.22         | n.a.   | MB*  |
| Total: |                 |           | 339.033       | 307.726         | 100.00        | 0.000  |      |

## Peppermint tea (S19):

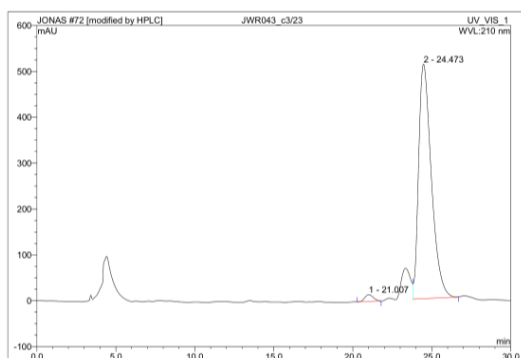

| No.    | Ret.Time<br>min | Peak Name | Height<br>mAU | Area<br>mAU*min | Rel.Area<br>% | Amount | Type |
|--------|-----------------|-----------|---------------|-----------------|---------------|--------|------|
| 1      | 21.01           | n.a.      | 14.384        | 8.735           | 1.80          | n.a.   | BM * |
| 2      | 24.47           | n.a.      | 510.826       | 476.276         | 98.20         | n.a.   | MB*  |
| Total: |                 |           | 525.210       | 485.011         | 100.00        | 0.000  |      |

## Fruit tea (S20):

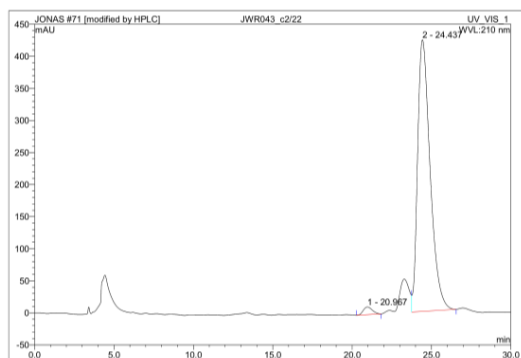

| No.    | Ret.Time<br>min | Peak Name | Height<br>mAU | Area<br>mAU*min | Rel.Area<br>% | Amount | Type |
|--------|-----------------|-----------|---------------|-----------------|---------------|--------|------|
| 1      | 20.97           | n.a.      | 11.957        | 7.747           | 1.96          | n.a.   | BM * |
| 2      | 24.44           | n.a.      | 423.507       | 387.196         | 98.04         | n.a.   | MB*  |
| Total: |                 |           | 435.463       | 394.943         | 100.00        | 0.000  |      |

## Honey solution 5 wt% (S21):

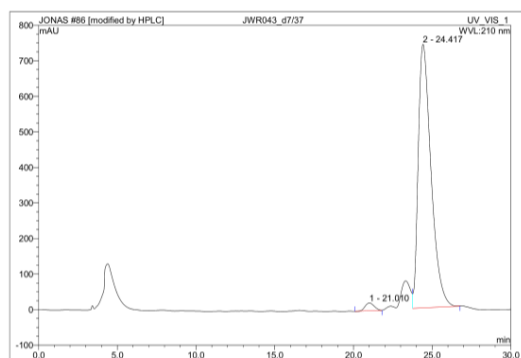

| No.    | Ret.Time<br>min | Peak Name | Height<br>mAU | Area<br>mAU*min | Rel.Area<br>% | Amount | Type |
|--------|-----------------|-----------|---------------|-----------------|---------------|--------|------|
| 1      | 21.01           | n.a.      | 21.903        | 14.502          | 2.04          | n.a.   | BMb* |
| 2      | 24.42           | n.a.      | 741.871       | 697.140         | 97.96         | n.a.   | MB*  |
| Total: |                 |           | 763.774       | 711.642         | 100.00        | 0.000  |      |



## Coke (S22):

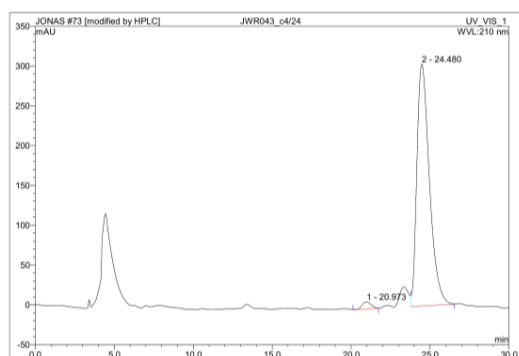

| No.    | Ret.Time<br>min | Peak Name | Height<br>mAU | Area<br>mAU*min | Rel.Area<br>% | Amount | Type |
|--------|-----------------|-----------|---------------|-----------------|---------------|--------|------|
| 1      | 20.97           | n.a.      | 8.942         | 5.858           | 2.06          | n.a.   | BM * |
| 2      | 24.48           | n.a.      | 303.729       | 279.025         | 97.94         | n.a.   | MB*  |
| Total: |                 |           | 312.672       | 284.883         | 100.00        | 0.000  |      |

## Rivella (S23):

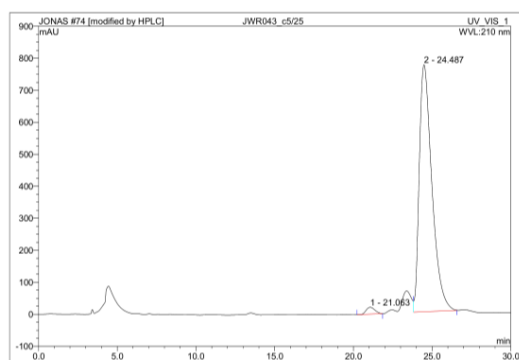

| No.    | Ret.Time<br>min | Peak Name | Height<br>mAU | Area<br>mAU*min | Rel.Area<br>% | Amount | Type |
|--------|-----------------|-----------|---------------|-----------------|---------------|--------|------|
| 1      | 21.06           | n.a.      | 21.416        | 13.640          | 1.87          | n.a.   | BM * |
| 2      | 24.49           | n.a.      | 772.117       | 717.078         | 98.13         | n.a.   | MB*  |
| Total: |                 |           | 793.533       | 730.718         | 100.00        | 0.000  |      |

## Diet Rivella (S24):

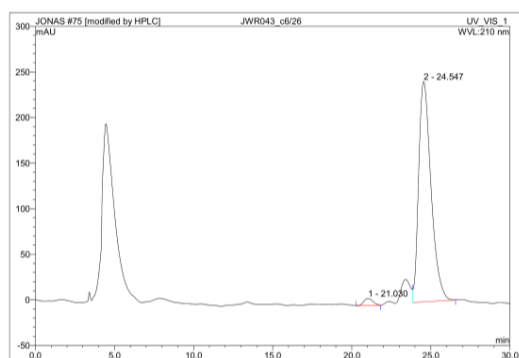

| No.    | Ret.Time<br>min | Peak Name | Height<br>mAU | Area<br>mAU*min | Rel.Area<br>% | Amount | Type |
|--------|-----------------|-----------|---------------|-----------------|---------------|--------|------|
| 1      | 21.03           | n.a.      | 7.957         | 5.493           | 2.45          | n.a.   | BM * |
| 2      | 24.55           | n.a.      | 241.584       | 218.486         | 97.55         | n.a.   | MB*  |
| Total: |                 |           | 249.541       | 223.979         | 100.00        | 0.000  |      |

## Ice tea (S25):

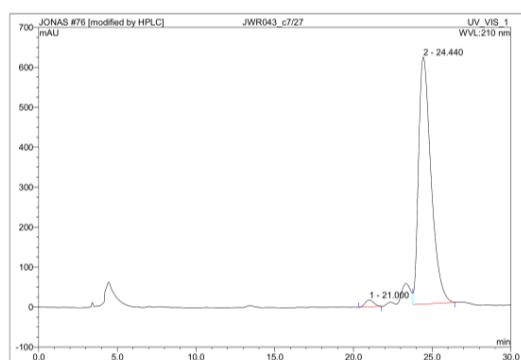

| No.    | Ret.Time<br>min | Peak Name | Height<br>mAU | Area<br>mAU*min | Rel.Area<br>% | Amount | Type |
|--------|-----------------|-----------|---------------|-----------------|---------------|--------|------|
| 1      | 21.00           | n.a.      | 16.980        | 10.524          | 1.82          | n.a.   | BM * |
| 2      | 24.44           | n.a.      | 617.923       | 567.100         | 98.18         | n.a.   | MB*  |
| Total: |                 |           | 634.903       | 577.624         | 100.00        | 0.000  |      |

## Beer (S26):

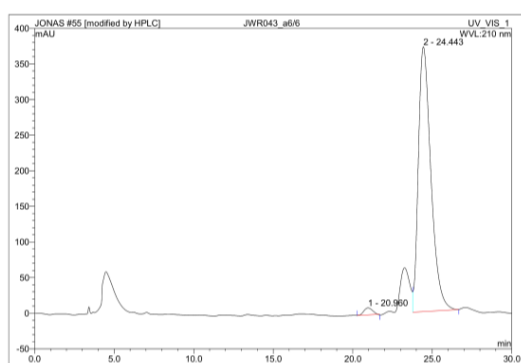

| No.    | Ret.Time<br>min | Peak Name | Height<br>mAU | Area<br>mAU*min | Rel.Area<br>% | Amount | Type |
|--------|-----------------|-----------|---------------|-----------------|---------------|--------|------|
| 1      | 20.96           | n.a.      | 9.718         | 5.920           | 1.71          | n.a.   | BM * |
| 2      | 24.44           | n.a.      | 371.655       | 339.861         | 98.29         | n.a.   | MB*  |
| Total: |                 |           | 381.373       | 345.780         | 100.00        | 0.000  |      |

## Red wine (S27):

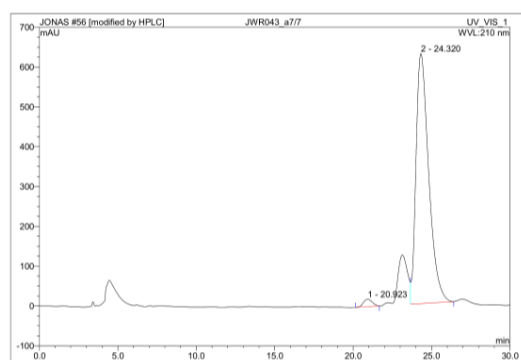

| No.    | Ret.Time<br>min | Peak Name | Height<br>mAU | Area<br>mAU*min | Rel.Area<br>% | Amount | Type |
|--------|-----------------|-----------|---------------|-----------------|---------------|--------|------|
| 1      | 20.92           | n.a.      | 18.580        | 11.995          | 2.00          | n.a.   | BM * |
| 2      | 24.32           | n.a.      | 627.586       | 588.543         | 98.00         | n.a.   | MB*  |
| Total: |                 |           | 646.166       | 600.537         | 100.00        | 0.000  |      |

## Amaretto (S28):

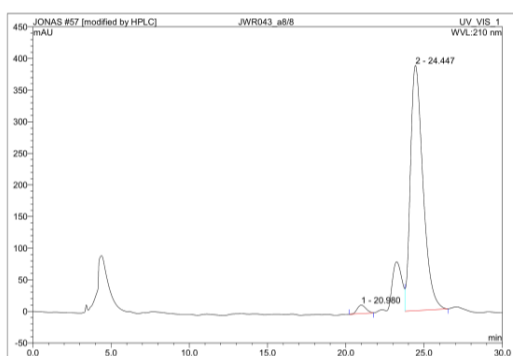

| No.    | Ret.Time<br>min | Peak Name | Height<br>mAU | Area<br>mAU*min | Rel.Area<br>% | Amount | Type |
|--------|-----------------|-----------|---------------|-----------------|---------------|--------|------|
| 1      | 20.98           | n.a.      | 13.345        | 8.611           | 2.33          | n.a.   | BM * |
| 2      | 24.45           | n.a.      | 387.959       | 361.102         | 97.67         | n.a.   | MB*  |
| Total: |                 |           | 401.304       | 369.713         | 100.00        | 0.000  |      |

## Herb Liqueur – “Jägermeister” (S29):

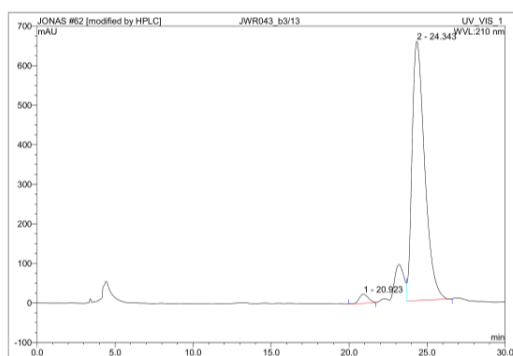

| No.    | Ret.Time<br>min | Peak Name | Height<br>mAU | Area<br>mAU*min | Rel.Area<br>% | Amount | Type |
|--------|-----------------|-----------|---------------|-----------------|---------------|--------|------|
| 1      | 20.92           | n.a.      | 22.721        | 15.510          | 2.46          | n.a.   | BM * |
| 2      | 24.34           | n.a.      | 655.145       | 614.155         | 97.54         | n.a.   | MB*  |
| Total: |                 |           | 677.866       | 629.665         | 100.00        | 0.000  |      |

## Scotch Whisky – Aberlour 18 y (S30):

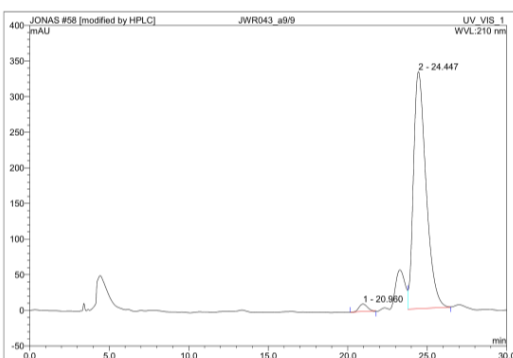

| No.    | Ret.Time<br>min | Peak Name | Height<br>mAU | Area<br>mAU*min | Rel.Area<br>% | Amount | Type |
|--------|-----------------|-----------|---------------|-----------------|---------------|--------|------|
| 1      | 20.96           | n.a.      | 10.425        | 6.040           | 1.94          | n.a.   | BM * |
| 2      | 24.45           | n.a.      | 332.624       | 304.990         | 98.06         | n.a.   | MB*  |
| Total: |                 |           | 343.049       | 311.030         | 100.00        | 0.000  |      |

## Vodka (S31):

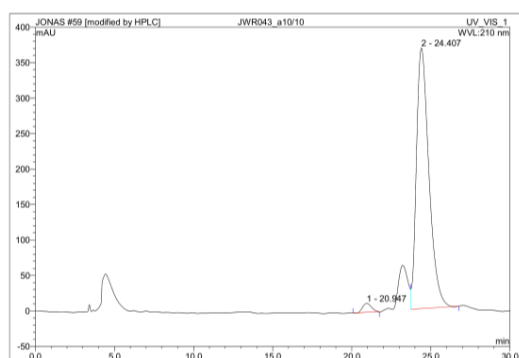

| No.    | Ret.Time<br>min | Peak Name | Height<br>mAU | Area<br>mAU*min | Rel.Area<br>% | Amount | Type |
|--------|-----------------|-----------|---------------|-----------------|---------------|--------|------|
| 1      | 20.95           | n.a.      | 12.410        | 7.755           | 2.26          | n.a.   | BM * |
| 2      | 24.41           | n.a.      | 367.373       | 336.060         | 97.74         | n.a.   | MB*  |
| Total: |                 |           | 379.782       | 343.815         | 100.00        | 0.000  |      |

## Gin (S32):

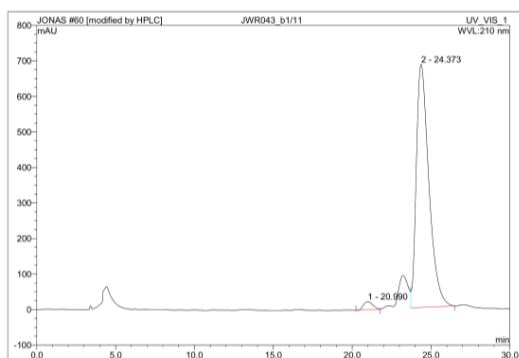

| No.    | Ret.Time<br>min | Peak Name | Height<br>mAU | Area<br>mAU*min | Rel.Area<br>% | Amount | Type |
|--------|-----------------|-----------|---------------|-----------------|---------------|--------|------|
| 1      | 20.99           | n.a.      | 22.852        | 15.414          | 2.38          | n.a.   | BM * |
| 2      | 24.37           | n.a.      | 683.924       | 631.365         | 97.62         | n.a.   | MB*  |
| Total: |                 |           | 706.777       | 646.778         | 100.00        | 0.000  |      |

## Rum (S33):

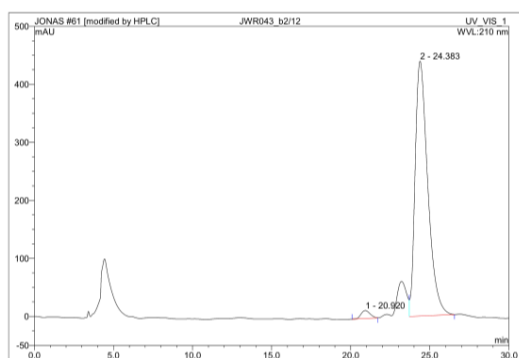

| No.    | Ret.Time<br>min | Peak Name | Height<br>mAU | Area<br>mAU*min | Rel.Area<br>% | Amount | Type |
|--------|-----------------|-----------|---------------|-----------------|---------------|--------|------|
| 1      | 20.92           | n.a.      | 13.664        | 8.889           | 2.14          | n.a.   | BM * |
| 2      | 24.38           | n.a.      | 439.257       | 406.511         | 97.86         | n.a.   | MB*  |
| Total: |                 |           | 452.921       | 415.400         | 100.00        | 0.000  |      |

## Aceto balsamico (S34):

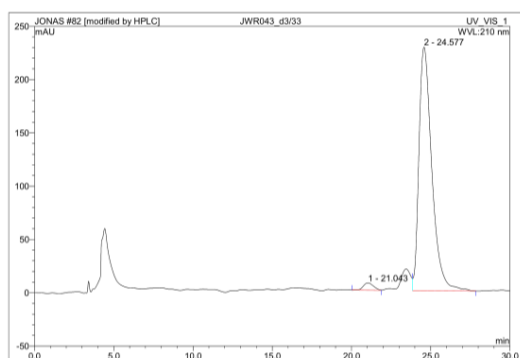

| No.    | Ret.Time<br>min | Peak Name | Height<br>mAU | Area<br>mAU*min | Rel.Area<br>% | Amount | Type |
|--------|-----------------|-----------|---------------|-----------------|---------------|--------|------|
| 1      | 21.04           | n.a.      | 6.799         | 5.014           | 2.27          | n.a.   | BM * |
| 2      | 24.58           | n.a.      | 228.498       | 215.640         | 97.73         | n.a.   | MB*  |
| Total: |                 |           | 235.296       | 220.654         | 100.00        | 0.000  |      |

## Herb vinegar (S35):

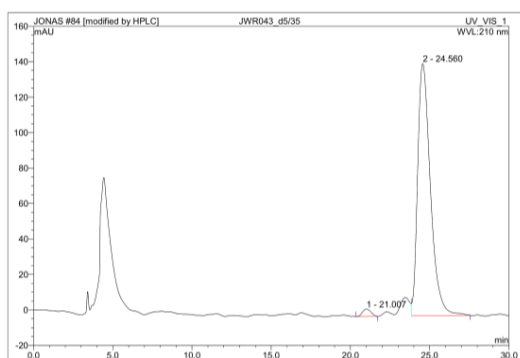

| No.    | Ret.Time<br>min | Peak Name | Height<br>mAU | Area<br>mAU*min | Rel.Area<br>% | Amount | Type |
|--------|-----------------|-----------|---------------|-----------------|---------------|--------|------|
| 1      | 21.01           | n.a.      | 3.982         | 2.393           | 1.78          | n.a.   | BM * |
| 2      | 24.56           | n.a.      | 142.201       | 132.381         | 98.22         | n.a.   | MB*  |
| Total: |                 |           | 146.183       | 134.773         | 100.00        | 0.000  |      |

## Olive oil (S36):

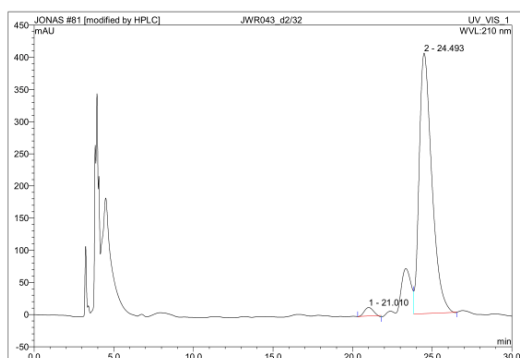

| No.    | Ret.Time<br>min | Peak Name | Height<br>mAU | Area<br>mAU*min | Rel.Area<br>% | Amount | Type |
|--------|-----------------|-----------|---------------|-----------------|---------------|--------|------|
| 1      | 21.01           | n.a.      | 13.226        | 8.155           | 2.14          | n.a.   | BM * |
| 2      | 24.49           | n.a.      | 405.240       | 373.412         | 97.86         | n.a.   | MB*  |
| Total: |                 |           | 418.466       | 381.568         | 100.00        | 0.000  |      |

## 8. Conjugate Addition Reaction in Cell Lysate:

### Preparation of the cell lysate:

Hep G2 cells were seeded in a *TPP® Tissue Culture Flask 300* culture plate and grown to approximately 80% confluence in a cell culture incubator at 37 °C and 5% CO<sub>2</sub>. The cells were washed three times with phosphate-buffered saline (PBS), then harvested off the bottom of the flask by cell scrapers into PBS buffer. The solution was transferred into conical *Falcon®* tubes. The collected cells were sonicated using a *Branson SFX 250 Sonifier®* while kept in an ice bath through the whole process. The cell lysate protein concentration was quantified at  $\lambda = 280$  nm using a *NanoDrop™* spectrophotometer.

### <sup>1</sup>H NMR spectra:

*Reaction with H-DPro-Pro-Glu-NH<sub>2</sub> 1 (440 mM nitrostyrene)*

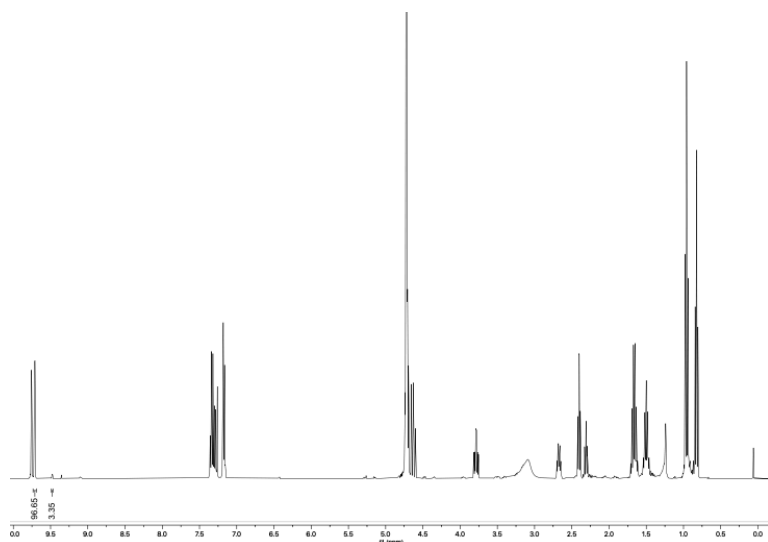

*Reaction with H-DPro-MePro-Glu-NH<sub>2</sub> 2 (440 mM nitrostyrene)*

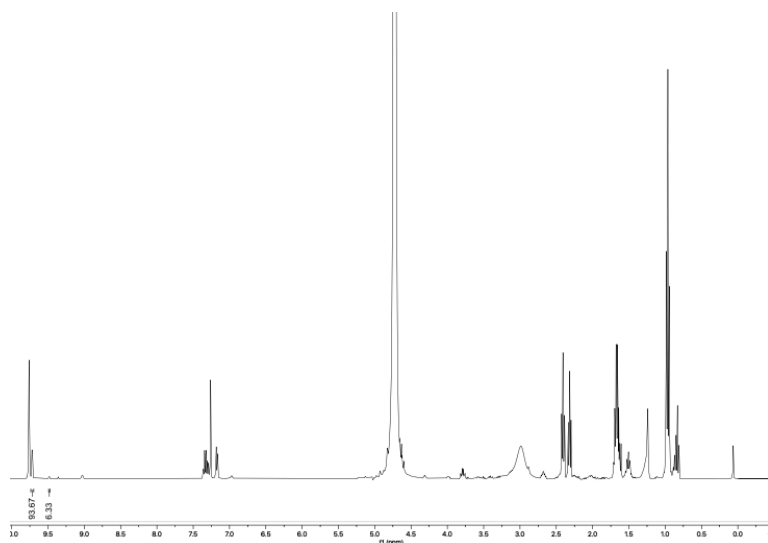

*Reaction with H-DPro-Pro-Glu-NH<sub>2</sub> 1 (44 mM nitrostyrene)*

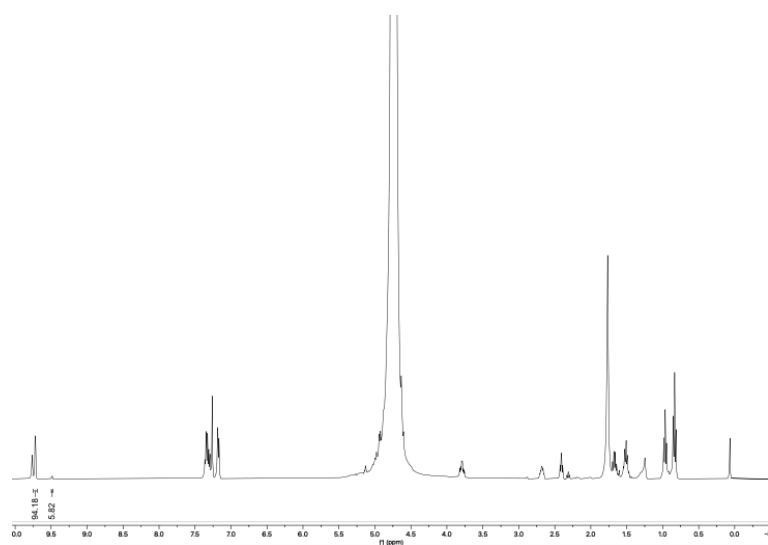

*Reaction with H-DPro-MePro-Glu-NH<sub>2</sub> 2 (44 mM nitrostyrene)*

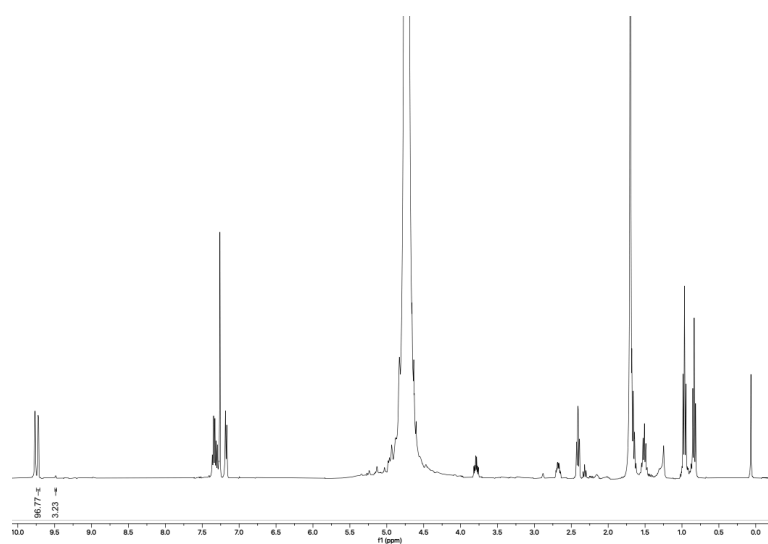

*Reaction with H-DPro-Pro-Glu-NH<sub>2</sub> 1 (4 mM nitrostyrene)*

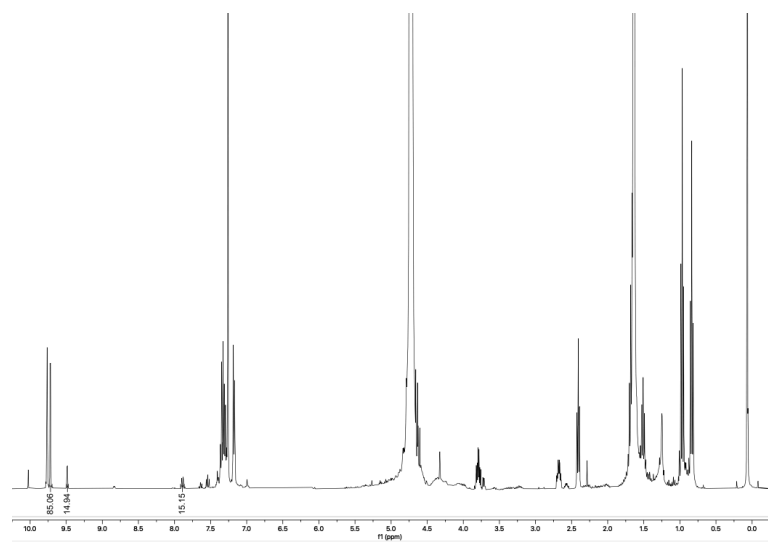

*Reaction with H-DPro-MePro-Glu-NH<sub>2</sub> 2 (4 mM nitrostyrene)*

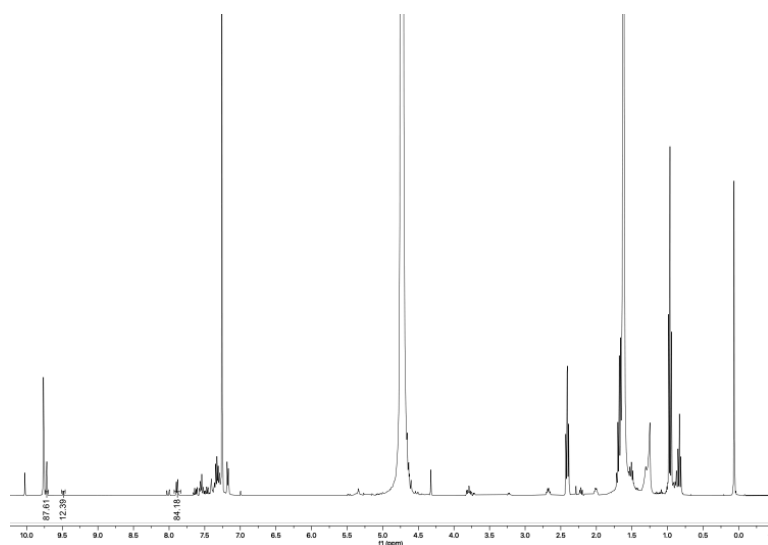



## HPLC chromatograms:

*Racemic sample:*

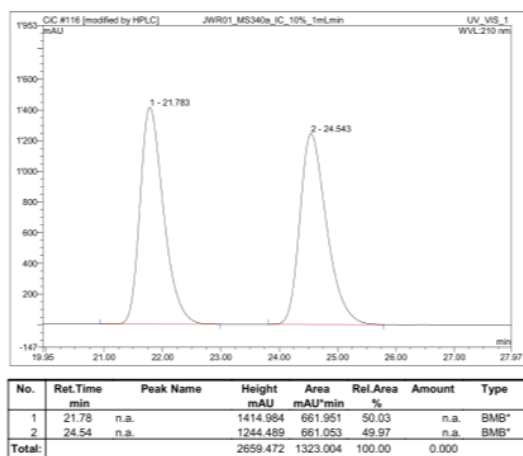

*Reaction with H-DPro-Pro-Glu-NH<sub>2</sub> 1 (440 mM nitrostyrene)*

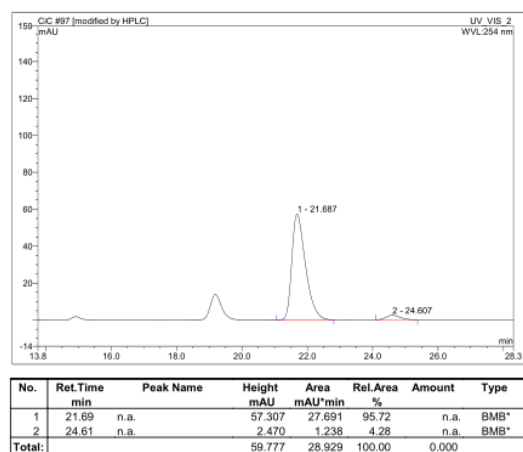

*Reaction with H-DPro-MePro-Glu-NH<sub>2</sub> 2 (440 mM nitrostyrene)*

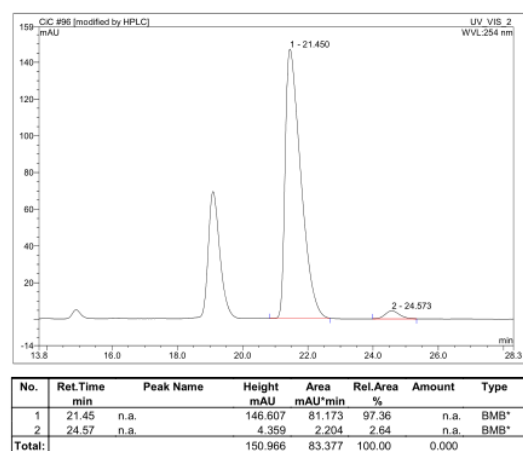

*Reaction with H-DPro-Pro-Glu-NH<sub>2</sub> 1 (44 mM nitrostyrene)*

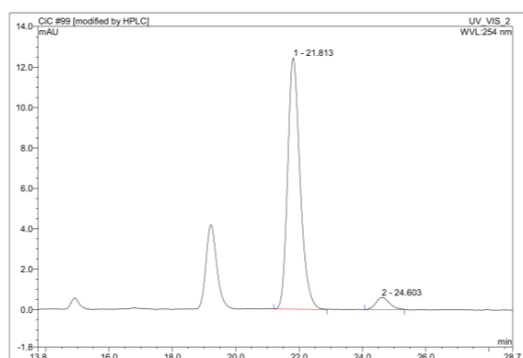

| No.    | Ret.Time<br>min | Peak Name | Height<br>mAU | Area<br>mAU*min | Rel.Area<br>% | Amount | Type |
|--------|-----------------|-----------|---------------|-----------------|---------------|--------|------|
| 1      | 21.81           | n.a.      | 12.434        | 5.652           | 94.90         | n.a.   | BMB* |
| 2      | 24.60           | n.a.      | 0.600         | 0.304           | 5.10          | n.a.   | BMB* |
| Total: |                 |           | 13.034        | 5.956           | 100.00        | 0.000  |      |

*Reaction with H-DPro-MePro-Glu-NH<sub>2</sub> 2 (44 mM nitrostyrene)*

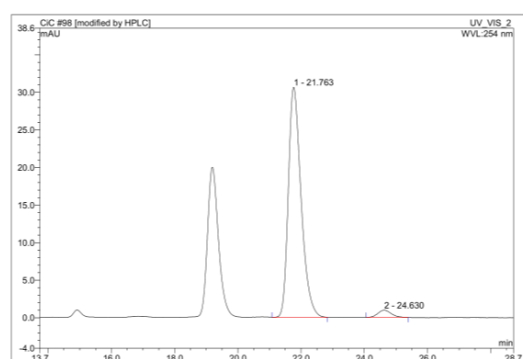

| No.    | Ret.Time<br>min | Peak Name | Height<br>mAU | Area<br>mAU*min | Rel.Area<br>% | Amount | Type |
|--------|-----------------|-----------|---------------|-----------------|---------------|--------|------|
| 1      | 21.76           | n.a.      | 30.608        | 14.280          | 96.80         | n.a.   | BMB* |
| 2      | 24.63           | n.a.      | 0.963         | 0.473           | 3.20          | n.a.   | BMB* |
| Total: |                 |           | 31.571        | 14.753          | 100.00        | 0.000  |      |

*Reaction with H-DPro-Pro-Glu-NH<sub>2</sub> 1 (4 mM nitrostyrene)*

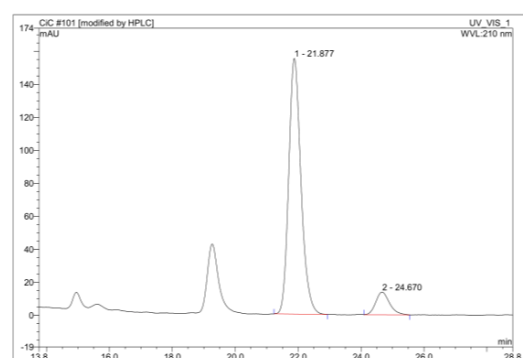

| No.    | Ret.Time<br>min | Peak Name | Height<br>mAU | Area<br>mAU*min | Rel.Area<br>% | Amount | Type |
|--------|-----------------|-----------|---------------|-----------------|---------------|--------|------|
| 1      | 21.88           | n.a.      | 155.009       | 69.924          | 90.90         | n.a.   | BMB* |
| 2      | 24.67           | n.a.      | 13.774        | 7.000           | 9.10          | n.a.   | BMB* |
| Total: |                 |           | 168.782       | 76.924          | 100.00        | 0.000  |      |

*Reaction with H-DPro-MePro-Glu-NH<sub>2</sub> 2 (4 mM nitrostyrene)*

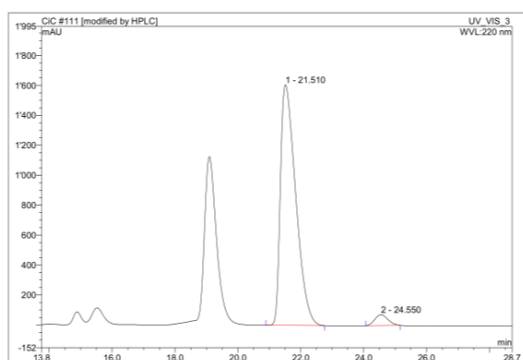

| No.    | Ret.Time<br>min | Peak Name | Height<br>mAU | Area<br>mAU*min | Rel.Area<br>% | Amount | Type |
|--------|-----------------|-----------|---------------|-----------------|---------------|--------|------|
| 1      | 21.51           | n.a.      | 1607.298      | 905.346         | 96.27         | n.a.   | BMB* |
| 2      | 24.55           | n.a.      | 72.930        | 35.093          | 3.73          | n.a.   | BMB* |
| Total: |                 |           | 1680.228      | 940.439         | 100.00        | 0.000  |      |

## 9. References

1. J. Duschmalé, S. Kohrt and H. Wennemers, *Chem. Commun.*, 2014, **50**, 8109.
2. M. Wiesner, M. Neuburger and H. Wennemers, *Chem. Eur. J.*, 2009, **15**, 10103.
3. C. Rigling, J. K. Kisunzu, J. Duschmalé, D. Häussinger, M. Wiesner, M. O. Ebert and H. Wennemers, *J. Am. Chem. Soc.*, 2018, **140**, 10829.
4. O. V. Dolomanov, L. J. Bourhis, R. J. Gildea, J. A. K. Howard and H. Puschmann, *J. Appl. Crystallogr.*, 2009, **42**, 339.
5. G. M. Sheldrick, *Acta Crystallogr. Sect. A Found. Adv.*, 2015, **71**, 3.
6. G. M. Sheldrick, *Acta Crystallogr. Sect. A Found. Crystallogr.*, 2008, **64**, 112.
7. T. Schnitzer and H. Wennemers, *J. Am. Chem. Soc.*, 2017, **139**, 15356.
